# Supplementary material for: Cash transfer programmes in lower-income and middle-income countries: understanding pathways to nutritional change—a realist review protocol
Source: PubMed Central journal article supplement — BMJ Open. 2019 May 27;9(5):e028314. doi: 10.1136/bmjopen-2018-028314 (PMC6537996; doi:10.1136/bmjopen-2018-028314), 2019-05-27
Supplement: bmjopen-2018-028314.draft_revisions.pdf [file bmjopen-2018-028314.draft_revisions.pdf]

# BMJ Open

BMJ Open is committed to open peer review. As part of this commitment we make the peer review history of every article we publish publicly available.

When an article is published we post the peer reviewers' comments and the authors' responses online. We also post the versions of the paper that were used during peer review. These are the versions that the peer review comments apply to.

The versions of the paper that follow are the versions that were submitted during the peer review process. They are not the versions of record or the final published versions. They should not be cited or distributed as the published version of this manuscript.

BMJ Open is an open access journal and the full, final, typeset and author-corrected version of record of the manuscript is available on our site with no access controls, subscription charges or pay-per-view fees (<http://bmjopen.bmj.com>).

If you have any questions on BMJ Open's open peer review process please email [info.bmjopen@bmj.com](mailto:info.bmjopen@bmj.com)

# BMJ Open

## **Cash Transfer Programmes in low-income countries, understanding pathways to nutritional change – A realist review protocol**

|                               |                                                                                                                                                                                             |
|-------------------------------|---------------------------------------------------------------------------------------------------------------------------------------------------------------------------------------------|
| Journal:                      | <i>BMJ Open</i>                                                                                                                                                                             |
| Manuscript ID                 | bmjopen-2018-028314                                                                                                                                                                         |
| Article Type:                 | Protocol                                                                                                                                                                                    |
| Date Submitted by the Author: | 04-Dec-2018                                                                                                                                                                                 |
| Complete List of Authors:     | Floate, Hilary; University of Queensland, School of Public Health<br>Marks, Geoffrey; University of Queensland, School of Public Health<br>Durham, Jo; Queensland University of Technology, |
| Keywords:                     | cash transfer programmes, realist review, nutrition status, nutrition-sensitive, children, food security                                                                                    |
|                               |                                                                                                                                                                                             |

SCHOLARONE™  
Manuscripts

1  
2  
3  
4 1 Cash Transfer Programmes in low-income countries, understanding pathways to nutritional  
5 2 change – A realist review protocol  
6 3  
7

8 4 Floate, Hilary<sup>1</sup>; Marks, Geoffrey C.<sup>2</sup>; Durham, Jo<sup>3</sup>  
9

10 5 <sup>1</sup> The University of Queensland, School of Public Health, Herston, Qld 4006 Australia; email:  
11 6 hilary.floate@uqconnect.edu.au  
12  
13

14 7 <sup>2</sup> The University of Queensland, School of Public Health, Herston, Qld 4006 Australia; email:  
15 8 g.marks1@uq.edu.au  
16  
17

18 9 <sup>3</sup> Queensland University of Technology, School of Public Health and Social Work, Kelvin  
19 10 Grove, Qld 4059 Australia; email: joanne.durham@qut.edu.au  
20  
21

22 11 Corresponding author: [hilary.floate@uqconnect.edu.au](mailto:hilary.floate@uqconnect.edu.au)  
23  
24

25 12  
26  
27 13 Word Count: 5136 (excluding title page, abstract, references and acknowledgements)  
28  
29

30 14  
31 15 PROSPERO Registration Number: CRD42018110735  
32  
33  
34  
35  
36  
37  
38  
39  
40  
41  
42  
43  
44  
45  
46  
47  
48  
49  
50  
51  
52  
53  
54  
55  
56  
57  
58  
59  
60

## 31 **Abstract**

32 **Introduction:** Child malnutrition continues to be a significant global public health concern.  
33 Nutrition-related interventions have changed and diversified over the last two decades, with  
34 increasing emphasis on nutrition-sensitive programmes which address the underlying  
35 determinants of child malnutrition. Cash transfer programmes (CTPs) are used with increasing  
36 popularity in low-middle-income countries to improve both food/nutrition insecurity and  
37 resilience. Available studies have provided mixed findings on the outcomes of CTPs on child  
38 nutritional status. The purpose of this review is to understand how, why, for whom and in what  
39 circumstances CTPs can consistently and positively influence child nutritional status.

40 **Methods and analysis:** This realist review is informed by RAMSES guidelines and recent  
41 protocols for reviews in similar contextual environments. A five-step process is to be  
42 followed. To ensure rigour and validity we adopt accepted and validated analytic techniques.  
43 Early scoping of the literature and a conceptual framing exercise has identified potential  
44 contextual factors and underlying mechanisms, providing the basis for tentative preliminary  
45 theories expressed as a series of If/Then statements and context-mechanism-outcome  
46 configurations. The analysis will apply a realist logic to identify patterns and  
47 regularities/demi-regularities in these configurations until programme theory (s) are refined.  
48 A final literature search, quality appraisal and data extraction will be undertaken to further  
49 test the theory(s). Final steps involve analysis and synthesis, and dissemination of a  
50 preliminary theory. The various CMOs constructed through our analysis will inform research  
51 to be undertaken following this review, involving primary data collection and expert  
52 consultations to extend our review findings.

53 **Ethics and dissemination:** This stage of the study will not involve primary research; however,  
54 ethical clearance has been sought through the University of Queensland for the next steps of  
55 the research project. Findings will be presented in accordance with RAMESES guidelines and  
56 published in a peer-reviewed journal.

57 **Keywords:** nutrition-sensitive, cash-transfers, unconditional cash transfer, conditional cash  
58 transfer, nutrition insecurity, malnutrition, nutrition status, children, food insecurity,  
59 implementation, realist review

## 60 **Article Summary**

### 61 **Strengths and Limitations of this study**

- 62 ➤ The use of realist review methods enables explicit examination of contextual factors  
63 and underpinning mechanisms to explain how various cash transfer programme  
64 (CTP) implementation structures, services and practices influence child nutritional  
65 status

1  
2  
3  
4  
5  
6  
7  
8  
9  
10  
11  
12  
13  
14  
15  
16  
17  
18  
19  
20  
21  
22  
23  
24  
25  
26  
27  
28  
29  
30  
31  
32  
33  
34  
35  
36  
37  
38  
39  
40  
41  
42  
43  
44  
45  
46  
47  
48  
49  
50  
51  
52  
53  
54  
55  
56  
57  
58  
59  
60

- 66 ➤ The review will provide a middle-range theory (MRT) and CMO configurations as a
- 67 summary of current understandings that can be empirically tested through the
- 68 collection and analysis of primary data
- 69 ➤ The method includes a broad range of evidence from various data sources, including
- 70 grey literature; while strengthening understandings of context it may also affect data
- 71 quality
- 72 ➤ The quality appraisal and data extraction stage of the review will adopt standard
- 73 approaches to ensure rigour and validity
- 74 ➤ Maintaining an audit trail throughout the review process will ensure decision-making
- 75 is structured and reproduceable
- 76

For peer review only

## 95 Background

96 Poor nutrition in low-resource countries continues to be an underlying cause of at least one  
97 third of all child deaths and approximately twenty percent of maternal mortality annually<sup>1</sup>.  
98 Evidence suggests however, that sufficient and adequate nutrition during the first 1000 days  
99 of life (from conception to a child's second birthday) would increase longer-term resilience to  
100 economic shocks at the individual, household, community, and national levels<sup>2</sup>. Based on a  
101 review of the evidence and with a focus on low-income countries, UNICEF has identified  
102 numerous factors that contribute to poor child nutrition status, and has consolidated these in  
103 a conceptual framework of the determinants of child nutritional status<sup>3</sup>. UNICEF categorises  
104 these determinants into the basic (e.g. political and economic structures), underlying (e.g.  
105 household food security/health environment/care for mothers and children), and immediate  
106 (e.g. child's dietary intake and child's health status)<sup>3</sup>. As with other social determinants of  
107 health, addressing the determinants of child nutritional status therefore requires interventions  
108 targeting not only child health, but the structural, environmental and resource related causes  
109 (i.e. underlying and basic determinants), affecting child nutritional status.

110 Based on the UNICEF Framework, interventions to improve maternal and child nutrition are  
111 typically categorised as nutrition-sensitive or nutrition-specific. Nutrition-sensitive strategies  
112 aim to address the underlying and basic determinants of child nutritional status and can  
113 support nutrition-specific interventions, such as feeding programmes and typically target  
114 women of reproductive age, pregnant and lactating women and children under the age of five.  
115 This is because children under the age of five are the most vulnerable to malnutrition and  
116 associated morbidities, and the prevention of largely irreversible outcomes (i.e. failure to  
117 thrive/stunting) must be addressed in the first 1000 days of life. Nutrition-sensitive  
118 interventions include for example, agricultural programmes, infrastructure development,  
119 education, asset support and social protection initiatives<sup>1</sup>. To address the basic and  
120 underlying determinants of child nutritional status, increasingly, donors and governments have  
121 been using cash transfer programmes (CTPs), to alleviate chronic and acute food and nutrition  
122 insecurity in vulnerable populations, rather than food aid<sup>4</sup>.

123 CTPs can be either conditional or unconditional. Examples of conditional cash transfers are  
124 incentives for school enrolment, immunisation programmes, childcare benefit schemes and  
125 unemployment benefits with job-seeking requirements<sup>5</sup>. This type of cash transfer is  
126 commonly used in more advanced economies. Unconditional cash transfers are those  
127 provided without conditions for recipients to meet certain behaviours, they can be offered  
128 through the provision of cash only or a package of assistance interventions, dependent on  
129 context. Examples include, monthly cash transfers during hunger gap periods to help  
130 households manage risk, continuous transfers to orphans and vulnerable households, or a  
131 combination of cash and in-kind assistance (e.g. food rations, if food availability in local  
132 markets is low). This form of cash transfer is more commonly employed in lower-middle-  
133 income countries, especially those with large rural populations, because of high rates of food  
134 insecurity and dependence on external support during periods of economic hardship (e.g.  
135 between harvest periods). For example, in Kenya, the Hunger Safety Net Programme (HSNP),  
136 provides unconditional cash transfers to pastoralist households in the North and East of the  
137 country during periods of low rainfall, to improve food security, reduce dependence on food  
138 aid and prevent the sale of assets.

139 The underlying theory of unconditional CTPs is that during periods of economic hardship, cash  
140 is provided in a timely manner (i.e. before the depletion of household assets and accumulation  
141 of debts), in sufficient quantities to meet essential household expenditures to facilitate positive,  
142 rather than negative, household risk management strategies. The underlying assumption of  
143 nutrition-sensitive CTPs is that by increasing household income, households will be able to

1  
2  
3 144 buy adequate quantities of food and of sufficient diversity, which in turn will benefit child  
4 145 nutrition and prevent both acute (e.g. wasting) and chronic (e.g. stunting) malnutrition.  
5 146 Improving nutritional outcomes through cash transfers however, is only one strategy and is  
6 147 usually complemented by other initiatives that aim to address the underlying and immediate  
7 148 determinants of child nutritional status <sup>16-8</sup>. For example, improving health services and health-  
8 149 seeking behaviours, increasing the capacity of primary health care workers to deliver nutrition  
9 150 education for caregivers, improving household agricultural productivity and work opportunities.

11  
12 151 While the underlying pathways of how CTPs may affect child nutritional status in times of  
13 152 economic hardship are illustrated in frameworks such as those provided by the UNICEF  
14 153 Framework, as scholars such as Leroy et al <sup>7</sup>, Black et al <sup>1</sup> and De Groot et al <sup>6</sup> observe,  
15 154 nutrition interventions such as CTPs are implemented in complex social systems with  
16 155 outcomes influenced by various contextual factors. Furthermore, while several studies have  
17 156 demonstrated CTPs can impact positively on food consumption, agricultural yields, and asset  
18 157 depletion <sup>7 9-12</sup>, there is limited research that explains how, in what circumstances and over  
19 158 what timeframe, various CTP implementation structures, services and practices influence child  
20 159 nutritional status. The purpose of this review is to understand how, why, for whom, in what  
21 160 circumstances, in what respect and over what duration, CTPs can consistently and positively  
22 161 influence child nutritional status. Applying a realist logic of enquiry will facilitate our exploration  
23 162 and explanation of the avenues in which CTPs reach intended and unintended child nutrition  
24 163 outcomes.

27 164 The review and evidence synthesis outlined in this protocol is the first stage of a research  
28 165 project that employs a theory-driven realist approach <sup>13</sup>. The results of tentative theories  
29 166 developed in this review will be empirically tested in Kenya and Ethiopia (currently  
30 167 implementing large-scale CTPs). We have selected a realist approach because CTPs have  
31 168 been implemented in different ways and in different contexts and available studies have  
32 169 provided mixed findings on the outcomes of CTPs on child nutrition, suggesting context may  
33 170 play a key role in how and in what circumstances different causal mechanisms are triggered  
34 171 to generate nutritional outcomes. Furthermore, using a realist synthesis will allow us to use  
35 172 evidence from a broad range of data sources from international development, nutrition, food  
36 173 security and CTPs, providing novel insights into CTP programme development and  
37 174 implementation. This will allow us to develop tentative theories that can then be tested  
38 175 empirically to provide a deeper understanding of CTP implementation structures and  
39 176 practices.

## 42 177 **Methods**

### 43 178 **Realist Review Methodology**

44 179 The realist approach to synthesising evidence has become accepted as a rigorous alternative  
45 180 method to systematic reviews, where the intent is to understand causation. Other forms of  
46 181 systematic reviews were investigated (e.g. meta-analysis), however, while providing  
47 182 information on outcomes, other methods often fail to explain how or why programmes worked  
48 183 and do not easily account for the complexity found in real-world nutrition related CTPs <sup>14</sup>.

51 184 Publication standards have been issued by the RAMESES (Realist and Meta-Narrative  
52 185 Evidence Synthesis: Evolving Standards) project, and realist reviews are utilised with greater  
53 186 frequency in complex intervention evaluations, particularly those related to human behaviour  
54 187 change outcomes, such as CTPs <sup>15-19</sup>. The approach is a theory-based approach to  
55 188 understanding 'what works for whom in what circumstances' and importantly, *why and in what*  
56 189 *context?* <sup>13</sup>.

59 190 The realist approach as proposed by Pawson and Tilley <sup>13</sup>, is based on a specific philosophical  
60 191 approach, that is, realism and more specifically, scientific realism, sitting somewhere between

1  
2  
3 192 positivism (the belief that knowledge must be scientifically tested with systematic  
4 193 mathematical or logical proof) and constructivism (the theory that knowledge is constructed  
5 194 by humans through their own experiences)<sup>20 21</sup>. The approach is based on the understanding  
6 195 that there is a social reality, but this is socially constructed. Outcomes (O) are generated by  
7 196 mechanism(s) (M) that are triggered within certain contexts (C). The mechanism(s) from a  
8 197 realist perspective (in socially contingent interventions) is usually hidden and is the reaction  
9 198 or response of people to resources introduced by the intervention within a certain context and  
10 199 can be enabling or disabling. Context relates to the setting in which the programme operates,  
11 200 including systems such as health, political, environmental, and social systems. The context  
12 201 can have several layers and can be separated into the outer and inner contexts of an  
13 202 intervention.

16 203 In a realist approach, the researcher seeks to understand interventions through the concept  
17 204 of generative causation that is hypothesised and tested through context-mechanism-  
18 205 configurations (CMOs)<sup>22</sup>. A key task for the researcher is to identify situations where  
19 206 interventions have had effective and/or ineffective implementation, achieving either planned  
20 207 or unplanned outcomes, and to examine the causes of these<sup>23</sup>. Typically, to achieve this  
21 208 differentiation, potential preliminary theory(s) (or candidate theory(s)) of the context,  
22 209 mechanisms and outcomes in which a programme is or will be implemented are generated  
23 210 throughout the review, to account for the processes of an intervention that lead to an outcome  
24 211<sup>24</sup>. CMO configurations and potential theories are then analysed to inform the creation of  
25 212 protocols for data collection for the review and analysis. Realist evaluations typically use data  
26 213 from various sources, including qualitative, quantitative or mixed methods studies. An  
27 214 evidence-informed programme theory answering the realist question of what works, for whom,  
28 215 under what circumstances, is the result of the inquiry<sup>13</sup>. All phases of a realist inquiry are  
29 216 iterative, to allow for constant refinement of potential theories and CMOs. Developing and  
30 217 testing CMO configurations can help ensure external validity, by enabling a level of abstraction  
31 218 for the theory, or theories, that can be useful in other contexts.

35 219 A realist synthesis, which is synonymous with the realist review, applies a realist philosophy  
36 220 to collate findings from various studies that are related to either a single research questions  
37 221 or a collection of questions<sup>25 26</sup>. The steps of a realist review, as recommended by Pawson et  
38 222 al<sup>22</sup> are as follows: 1. Clarifying the scope of the review 2. Searching for evidence 3.  
39 223 Appraising primary studies and extracting data 4. Synthesising evidence and drawing  
40 224 conclusions 5. Disseminating, implementing and evaluating. All phases of a realist inquiry are  
41 225 iterative, to allow for constant refinement of potential theories and CMOs. Developing and  
42 226 testing CMO configurations can help ensure external validity, by enabling a level of abstraction  
43 227 for the theory, or theories, that can be useful in other contexts. Step 1 of the review has been  
44 228 completed, step 2 is currently in progress.

#### 47 229 Protocol and Review Methods

48 230 The approach for this protocol has been informed by peer-reviewed realist review protocols  
49 231 published in the last ten years, RAMESES guidelines and the work of Ray Pawson<sup>13 27-37</sup>. We  
50 232 conducted a search of databases such as Medline, Scopus, and Google Scholar, using search  
51 233 terms including “realist review” and “protocol”. Our search yielded 68 records, of which 13  
52 234 were found to be pertinent for our review. Relevant protocols were chosen based on  
53 235 similarities in programme contextual factors, such as national operating systems, multiple  
54 236 implementing agencies, multifaceted causal chains, and potential outcomes. These have  
55 237 informed the protocol below.

58 238 To ensure rigour and validity, we adopt accepted and validated analytic techniques. The use  
59 239 of these techniques will allow us to compare and consolidate key multidisciplinary



1  
2  
3 240 implementation attributes and their relationships<sup>27</sup>. We used the PRISMA-P checklist when  
4 241 writing our report<sup>38</sup>.

## 6 242 Review objectives

7 243 To understand the relationships between cash transfer programmes and child nutritional  
8 244 status the objectives of our review are to:

- 10 245 1) identify the underlying programme theory (s) of CTPs with nutrition objectives,  
11 246 targeting children under five and pregnant and lactating women in low income  
12 247 countries
- 14 248 2) explore how and why these interventions influence nutritional status of children under  
15 249 five, particularly in the context of large-scale, multi-stakeholder interventions, driven by  
16 250 external donors
- 17 251 3) identify how cash transfer programmes achieve or propose to achieve nutrition  
18 252 outcomes in the context of large-scale social protection programmes in low- and  
19 253 middle-income countries
- 20 254 4) understand the key contextual factors that interreact with the resources (i.e. cash  
21 255 transfer) and the reasoning of participants to generate nutrition outcomes.

## 24 257 Patient and Public Involvement

25 258 The public and/or patients were not involved in this stage of the research project

## 27 259 Step 1: Theoretical and conceptual framework

28 260  
29 261 The initial theoretical and conceptual frameworks of how nutrition sensitive programmes are  
30 262 theorised to influence child nutrition status were identified based on an initial review of the  
31 263 literature, discussions with relevant stakeholders (e.g. donors, community members,  
32 264 development practitioners) working in nutrition and food security and the first author's practical  
33 265 experience. The initial literature search revealed four potentially relevant frameworks<sup>1 6-8</sup>.  
34 266 Based on these frameworks and the UNICEF conceptual framework<sup>1 3 6-8</sup>, and complemented  
35 267 by stakeholder interviews and practical experience, we identified common themes across the  
36 268 frameworks and possible gaps in knowledge. We then mapped the proposed pathways and  
37 269 underlying assumptions of how CTPs influence child nutritional status in a conceptual framing  
38 270 exercise (using the UNICEF and other relevant frameworks as our foundation) and then began  
39 271 the process of identifying potential CMO configurations and tentative theories. The results  
40 272 included several potential CMOs, and a series of If/Then statements to facilitate in the creation  
41 273 of tentative theories. The CMOs have been categorised into four main domains, that were  
42 274 chosen through the grouping of common concepts and themes. The four main domains of  
43 275 implementation structures, contextual influences, food and community response, as  
44 276 represented in Figure 1. Implementation practices have been identified as a key contributing  
45 277 factor in CTPs achieving nutrition outcomes. Therefore, this review will also draw on the  
46 278 practical concepts of implementation research guidelines to help with our understanding of  
47 279 what elements of CTPs contribute to planned or unplanned outcomes

51  
52 280 An example of two of our hypothesised CMOs and tentative theories categorised under the  
53 281 domain of implementation structures and associated capacity building are as follows:

- 55 282 • Nutrition education provided by a health professional (C), who is skilled in  
56 283 behaviour change techniques (resource M) and able to create nutrition  
57 284 awareness in recipients (response M) that will ensure CTP recipients provide  
58 285 food to their children in sufficient quantity and diversity and prevent/treat  
59 286 diseases, reducing chronic malnutrition rates in children under five (O)

- 1  
2  
3 287 OR  
4 288 • Nutrition education provided by CTP employees (e.g. government workers or  
5 289 programme monitors) (C), unskilled in behaviour change techniques but trained  
6 290 in CTP protocols (resource M), deliver appropriate nutrition messages and  
7 291 health-seeking advice, guaranteeing CTP recipients diversify their child's daily  
8 292 dietary intake and prevent diseases (response M), reducing chronic  
9 293 malnutrition rates in children under the age of five (O)

## 12 294 **Step 2: Identifying relevant literature to develop preliminary programme theories**

13 295 Following the identification of our tentative programme theory (s), the next stage in our review  
14 296 will be to identify the relevant literature for inclusion in the review. The purpose of this step is  
15 297 to identify a broad range of studies relating to CTPs and their outcomes from quantitative,  
16 298 qualitative and mixed methods empirical studies.

### 18 299 **Literature search strategy**

19 300 Following the RAMESES guidelines for a realist review, in this step we will undertake an  
20 301 iterative approach to searching for relevant literature, allowing relevant new studies to be  
21 302 included continuously into findings and the overall synthesis.

23 303 We expect databases such as Medline, ProQuest, Cochrane, Scopus, Web of Science and  
24 304 Google Scholar to be most instrumental in our search of the extant literature. The search will  
25 305 be conducted in English, the research questions and theoretical framework will inform  
26 306 selection of search terms, including for example: cash transfer, nutrition, children, pregnant  
27 307 and lactating women, women of reproductive age, nutrition sensitive, conditional cash transfer,  
28 308 unconditional cash transfer, social safety nets, financial incentives, food security, food  
29 309 consumption, dietary diversity, acute, chronic malnutrition, low-income, middle-income, social  
30 310 protection, implementation, World Bank, WFP, UNICEF, WHO, DFID, USAID. The search  
31 311 strategy will include variations of the following examples of term combinations:

- 34 312 • “cash transfers” AND “nutrition”  
35 313 • “cash transfers” AND “nutrition” AND “children”  
36 314 • “cash transfers” OR “social safety nets” OR “financial incentives” AND “nutrition” OR  
37 315 “nutritional status”  
38 316 • “cash transfers” OR “conditional cash transfer” OR “unconditional cash transfer” AND  
39 317 “nutrition”  
40 318 • “cash transfers” AND “food security”

43 319 All searches will be limited to those published from 1990 (reflecting the start of Latin American  
44 320 CTP programmes, where the first large-scale conditional cash transfers were implemented) to  
45 321 present.

### 47 322 **Inclusion and exclusion criteria**

48 323 As per the realist approach, in this study, we are less concerned with whether an evaluation  
49 324 meets traditional epidemiological methodological standards, (e.g. must be a randomised  
50 325 controlled trial or case-control trial), but rather what type of information may be gathered from  
51 326 studies about how, why and for whom CTPs achieve nutritional change, and under what  
52 327 circumstances. Our inclusion and exclusion criteria have been designed to reflect this, by  
53 328 including a variety of studies regardless of study design. The studies will be included or  
54 329 excluded based on programme elements at this stage of the literature search, as per the  
55 330 following:  
56 331  
57  
58  
59  
60

### 331 Included

- 332 1) Programmes targeting children under the age of five, including pregnant and lactating
- 333 women
- 334 2) Programmes with >1000 recipients
- 335 3) Programmes implemented through government systems at national level with external
- 336 donor support
- 337 4) Welfare programmes in high-income countries
- 338 5) Programmes targeting increased food consumption, dietary diversity, and reduction of
- 339 malnutrition rates as primary outcomes
- 340 6) Programmes measuring at least one proximal outcome, such as maternal child care
- 341 practices, IYCF practices and micronutrient deficiencies in women and children

### 342 Excluded

- 343 1) Programmes targeting school-aged children, adolescents, and adults (except pregnant
- 344 and lactating women (PLWs))
- 345 2) Small-scale emergency relief cash transfer programmes implemented as a one-off
- 346 intervention
- 347 3) Studies that do not measure at least one proximal outcome (e.g. dietary diversity,
- 348 household food consumption, maternal childcare practices)

### 349 Article Screening

350 One reviewer will generate a list of articles and abstracts (if available), based on the search  
 351 strategy mentioned above. These will be separated among the review team and titles and  
 352 abstracts will be reviewed by individual reviewers to see if they 1) focused on CTPs  
 353 (regardless of modality) and if 2) they appear to fit with the inclusion/exclusion criteria.  
 354 Reviewers will list the articles as 'include', 'exclude' and 'maybe'<sup>39</sup>. In the absence of an  
 355 abstract, titles of articles will be used to determine if they are appropriate for review (e.g.  
 356 mention of CTPs and nutrition outcomes). If the title is ambiguous, the article will remain in the  
 357 'maybe' group for the next stage of the review. Following Velonis (2016), we will ensure inner-  
 358 rater reliability, through a randomly selected number of article titles and abstracts, each being  
 359 reviewed independently to determine if the study should be included. In the case of  
 360 discrepancies, agreements will be reached collectively.

361 Following the initial screening, articles that have been labelled 'included' and 'maybe' will be/  
 362 reviewed a second time by the reviewers. Once completed, the reviewers will discuss and  
 363 collate results, in cases where an article has been 'included' by one reviewer and 'excluded'  
 364 by the second reviewer, reasoning will be discussed, and a consensus reached.

365 The complete article or paper for titles included at this stage will then be obtained for the final  
 366 stage of the screening. Inter-rater reliability will be assessed again by having the reviewers  
 367 read the same randomly selected five articles, make their own recommendations on inclusion  
 368 and exclusion, then meet to discuss as a group<sup>39</sup>. Results will be discussed collectively  
 369 between the reviewers to ascertain any differences between findings, points of difference in  
 370 categorisation will be discussed and consensus reached mutually. The remaining articles will  
 371 be distributed amongst the reviewers and skim read to make a final decision as to their  
 372 inclusion or exclusion, findings will again be shared, and consensus reached. Articles will be  
 373 used as input for step 3 of the review.

### 374 Analysis

#### 375 Step 3: Refining programme theories

376 This step seeks to refine our tentative programme theories and CMOs following the initial  
 377 screening of the literature as outlined in steps 1 and 2 of the protocol as per RAMESES and  
 378 Pawson recommendations for realist reviews<sup>22,30</sup>. In this step we will seek to review the articles

1  
2  
3 379 identified in step 2 and consider them in relation to our programme theories for integrity,  
4 380 adjudicate between rival programme theories and review the same theories in comparative  
5 381 settings<sup>22</sup>. These three strategies will facilitate in the consolidation of our programme theories.  
6 382 A final literature search, quality appraisal and data extraction of included studies is also  
7 383 included in this step of the review.  
8

9 384 1) Reviewing for programme theory integrity

10 385 The purpose of this strategy is to study how programmes have been implemented in  
11 386 what contexts and what results they have generated for whom. According to Pawson  
12 387 et al<sup>22</sup>, in a realist synthesis, this strategy can aid in the discovery of typical weak  
13 388 points in the history of the programme under review. For this review, this will mean for  
14 389 example, examining the history of CTPs to identify if changes and deviations in  
15 390 implementation structures have had an influence on child nutrition outcomes.  
16 391

17 392 For example (hypothesised theory):

- 18 393
- 19 394 • CTPs implemented by national governments without external support (C) using  
20 395 standardised CTP protocols and clear guidelines with nutrition objectives (M  
21 396 resource), ensuring CTP implementers have a clear understanding of  
22 397 programme priorities and how to deliver them (M response), are more  
23 398 successful in changing traditional food beliefs (O).

24 399 2) Reviewing to adjudicate between rival programme theories

25 400 The purpose of this strategy is to identify which variations of mechanisms are most  
26 401 successful in driving different outcomes, by uncovering evidence from competing  
27 402 programme theories<sup>22</sup>. The conceptual frameworks, tentative theories and CMOs  
28 403 identified in Step 1 of the review, highlight the numerous possible pathways a CTP  
29 404 may improve child nutrition status. By adjudicating between rival programme theories,  
30 405 we will elicit key causal factors that may be driving changes in outcomes in large-scale  
31 406 CTPs, through analysis of both relevant literature and consultation with a range of  
32 407 stakeholders, to identify what works for whom in what circumstances.  
33 408

34 409 For example (hypothesised theory):

- 35 410
- 36 411 • CTPs provided with nutrition education training (C) are more successful in  
37 412 improving maternal child care practices (O), when delivered by a local  
38 413 midwife/traditional birth attendant (M resource) as women are more likely to  
39 414 trust messages given by established community members (M response).  
40 415 OR
  - 41 416 • CTPs delivered through condition of attendance to maternal child health  
42 417 services (C), ensure women will improve child care practices (O) or they will  
43 418 not receive monthly cash payments (M resource) and positive nutrition  
44 419 awareness (M response) will only be achieved through constant monitoring.

45 420 3) Reviewing the same theory in comparative settings

46 421 This strategy addresses the core of realist evaluation to identify patterns in the context  
47 422 in which interventions interact with participant reasoning to generate outcomes<sup>22</sup>. Our  
48 423 theories will be compared between settings with similar CTP modalities in terms of the  
49 424 four domains highlighted in Figure 1.  
50 425

51 426 For example (hypothesised theory):

- 52 427
- 53 428 • Conditional CTPs implemented by national and local governments (C) ensure  
attendance at MCH clinics for health and nutrition screening, provided by skilled

1  
2  
3 429 health professionals (M resource), recipients will attend and receive nutrition  
4 430 education, creating positive behaviour change (M response) that will improve  
5 431 the nutrition status of children in recipient households (O).

6 432 OR

- 7 433 • Unconditional CTPs provided by INGOs and NGOs (C), with positive  
8 434 implementation histories, will provide nutrition education programmes in  
9 435 conjunction with cash transfers, through skilled outreach workers (M resource)  
10 436 who are trusted by the community (M response) and diversify diets for children  
11 437 in recipient households (O).

#### 14 438 Literature search strategy

15 439 The purpose of a literature search in this step of the review is to further explore evidence from  
16 440 a wide range of programmes, including empirical studies, policy and protocol documents,  
17 441 evaluations, systematic reviews, grey literature (non-peer reviewed documents) from the field  
18 442 (e.g. programme proposals, monitoring reports and donor updates) that will add to the search  
19 443 from step 2 in the development of our programme theory. The search in this phase will be  
20 444 more purposive in nature than in step 2. Reference and citation searches from articles  
21 445 identified in step 2 will be tracked through 'snowballing' search techniques to identify additional  
22 446 documents<sup>22</sup>. Additional articles will be selected at this stage according to whether they add  
23 447 to our emerging theories or areas of explanatory potential in terms of context, mechanism and  
24 448 outcome patterns<sup>30</sup>. New targeted search terms, not included in the original search will be  
25 449 used in this stage of the literature search, as per realist evidence searching recommendations  
26 450<sup>30 40</sup>.

29 451 Searching for new documents will end at the point of theoretical saturation, that is, when we  
30 452 have established there is sufficient evidence to establish our MRT<sup>25</sup>.

32 453 Agency project proposals, donor progress reports, protocol documents and descriptive  
33 454 evaluations will be required for use in the identification of effective or ineffective  
34 455 implementation practices. Whilst these will not have methodological rigour, they are  
35 456 considered essential documents in the construction of our programme theory. Quality issues  
36 457 will be addressed as per the section below.

#### 39 458 Quality appraisal and Data Extraction

40 459 One reviewer (HF) has commenced searching databases as per step 2 of the protocol and  
41 460 article screening has commenced. Articles will be appraised by two reviewers based on  
42 461 relevance and demonstration of sufficient rigour (methods used to generate data will be  
43 462 appraised in the analysis and synthesis)<sup>25</sup>. The MMAT (Mixed Methods Appraisal Tool) will be  
44 463 used to assess the rigour and validity of articles. It is recommended by RAMESES to appraise  
45 464 the quality of quantitative, qualitative and mixed methods studies and has been independently  
46 465 tested for efficiency and reliability<sup>14 41 42</sup>. A third reviewer will review approximately 10% of  
47 466 included papers against the MMAT tool to further ensure rigour and reliability. Implementation  
48 467 practices have been identified as one of the key influencing factors for CTPs to achieve  
49 468 nutrition outcomes in our preliminary programme theory, therefore, we will also use the Egan  
50 469 et al (2008) implementation appraisal checklist to guide our appraisal of the quality of reporting  
51 470 of implementation practices from the articles included in our review<sup>43</sup>. The checklist will require  
52 471 some modification due to differing contexts, however, several themes from the Egan et al  
53 472 (2008) checklist are consistent with the organisational-level workplace interventions of the  
54 473 CTPs we are evaluating (e.g. motivation, theory-of-change, employee support, resources  
55 474 provided, differential effects and population characteristics)<sup>43</sup>. These techniques and tools will  
56 475 only be applied to the relevant aspects of the studies that relate to our programme theory  
57 476 rather than the study as a whole<sup>14</sup>.

1  
2  
3 477 Data extraction will focus on key context, mechanism and outcome findings that will contribute  
4 478 to the further development and refinement of CMO configurations and programme theories.  
5 479 An excel spreadsheet for extracting data from articles based on their relevance and rigour,  
6 480 following the article screening step of step 2, will be formulated and agreed on between the  
7 481 reviewers. Reviewers will use the spreadsheet to record the following information: 1) the  
8 482 programme elements that are described, 2) what nutrition outcomes are measured and how  
9 483 they are measured, 3) what proximal outcomes (e.g. improved maternal child care practices  
10 484 through nutrition education support) are measured and how they are measured, 4) contextual  
11 485 factors that are mentioned in the article, 5) mechanisms that lead to outcomes that are  
12 486 mentioned in the article, 6) the study design and rigour (e.g. making note of potential bias or  
13 487 validity issues using the MMAT tool and Implementation Appraisal checklist) of the article. The  
14 488 findings of the review will provide an overall impression of the depth of the data available and  
15 489 how much it will contribute to our programme theory <sup>39</sup>.

#### 18 490 Step 4: Analysis and Synthesis

19 491 This step will involve the examination of the gathered data and determining whether it refutes  
20 492 or supports our preliminary programme theory and theoretical framework. We will explore the  
21 493 various evaluations pertaining to proximal child nutrition outcomes (e.g. maternal child care  
22 494 practices, food security and availability of health resources) and assess how the data extracted  
23 495 from these studies informs our understanding of how cash transfer programmes achieve  
24 496 nutritional change in children under the age of five. We will use the data to create CMOs for  
25 497 each programme, or ‘family of programmes’ under investigation. The various CMOs  
26 498 constructed through our analysis will be tested in research to be undertaken following this  
27 499 review involving primary data collection methods and consultation with experts and key  
30 500 programme stakeholders to extend our review findings and construct our middle range theory  
31 501 (MRT).

#### 33 502 Step 5: Presentation and Dissemination

34 503 The findings from the review will be presented in accordance with the RAMESES guidelines  
35 504 as recommended by Wong et al <sup>25</sup>. Findings will be published in a peer-reviewed journal. The  
36 505 results will be disseminated to policymakers, external donors, relevant governments, and  
37 506 research institutes (e.g. IFPRI), through formal or informal presentations, conferences and  
38 507 reports.

#### 40 508 Discussion

41 509 Cash transfer programmes are inherently complex, involving numerous programme  
42 510 components, systems for implementation, aiming to produce a variety of outcomes. They are  
43 511 heterogeneous interventions, ranging from conditional cash transfers to cash and in-kind  
44 512 assistance (e.g. food aid distribution), provided in a diverse range of settings to a variety of  
45 513 recipients. In theory, CTPs should be able to achieve positive nutrition outcomes through their  
46 514 ability to influence the determinants of nutrition status and CTPs are rapidly replacing  
47 515 traditional food security programmes, as a strategy to alleviate chronic poverty for households  
48 516 vulnerable to economic shocks and to improve both food security and nutrition resilience.  
49 517 Evidence suggests CTPs have a positive impact on household food consumption and asset  
50 518 holdings. However, child nutrition outcomes are not routinely achieved through social safety  
51 519 net programmes <sup>44</sup> and there is limited understanding of how they can be optimally  
52 520 implemented to consistently influence child nutrition status.

56 521 One of the key contributions of this review, in relation to other CTP impact evaluations and  
57 522 systematic reviews is our focus on how the various CTP programme elements and  
58 523 implementation structures can be implemented synergistically to improve nutrition status,  
59 524 rather than evaluating the impact effect on nutrition through the cash transfer itself. To our

1  
2  
3 525 knowledge this is the first realist review of these types of interventions. The use of this  
4 526 approach in conjunction with other methods for data analysis and synthesis, will offer a deeper  
5 527 understanding of the mechanisms and contextual factors required to address the various  
6 528 determinants of child nutrition status throughout CTP implementation processes. We believe  
7 529 our choice of study design and evidence synthesis will provide strong explanatory evidence of  
8 530 how and why CTPs produce nutrition outcomes, in what circumstances and for whom. Our  
9 531 initial review of the literature indicates an existing and current evidence base related to CTP  
10 532 impact on both child nutrition indicators and proximal outcomes, such as household food  
11 533 consumption and maternal childcare practices. However, evaluations of the entire  
12 534 implementation process have been limited. Theorising programme CMO configurations  
13 535 through a realist-informed evidence synthesis will expand the knowledge surrounding  
14 536 implementation processes and structures that may be pivotal for CTPs to achieve nutrition  
15 537 change. These concepts may not have been fully explored using existing conceptual  
16 538 frameworks. The realist review method has limitations and findings may not be easily  
17 539 reproduced due to its theoretical causal relationships and inability to analyse data across  
18 540 several disciplines. These limitations will be addressed using other complementary methods,  
19 541 such as meta-ethnography in the data analysis and synthesis phases. The strength of the  
20 542 realist review method is its ability to be flexible and adaptable, which suits the complexity of  
21 543 large-scale social safety net programmes with external donor support.

22  
23  
24  
25 544 The research will facilitate in the development of strategies to be included in CTP project  
26 545 design and implementation guidelines to produce consistent nutrition outcomes in contexts  
27 546 where large-scale, multi-sectoral safety social net programmes are a core poverty alleviation  
28 547 policy.

29  
30  
31 548 **[Figure 1 near here]**

32 549

33 550 **Acknowledgements:**

34 551 The authors would like to thank the reviewers for their invaluable comments

35  
36 552 **Author Contributions:**

37 553 All authors contributed to the conception and design of the study, protocol and manuscript. All  
38 554 authors read and approved the final manuscript

39  
40 555 **Funding:**

41 556 This research received no specific grant from any funding agency in the public, commercial or  
42 557 non-for-profit sectors

43  
44 558 **Competing Interests:**

45 559 None to declare

46  
47 560 **Data Statement:**

48 561 This paper describes a protocol for undertaking a literature review. As such data are not yet  
49 562 available for lodging with a repository

50  
51 563

52  
53 564

54  
55 565

56  
57 566

58  
59 567

568

569 **References**

- 570 1. Black RE, Alderman H, Bhutta ZA, et al. Maternal and child nutrition: building momentum  
571 for impact. *Lancet (London, England)* 2013;382(9890):372-75. doi: 10.1016/S0140-  
572 6736(13)60988-5
- 573 2. Bhutta Z.A, Ahmed T, Black RE, et al. What works? Interventions for maternal and child  
574 undernutrition and survival. *The Lancet* 2008;371(9610):417-40.
- 575 3. UNICEF. Conceptual framework of the causes of malnutrition. *New York: UNICEF* 1991
- 576 4. Ruel MT, Alderman H, Maternal, et al. Nutrition-sensitive interventions and programmes:  
577 how can they help to accelerate progress in improving maternal and child nutrition?  
578 *Lancet (London, England)* 2013;382(9891):536. doi: 10.1016/S0140-6736(13)60843-  
579 0
- 580 5. Medgyesi M, Temesváry Z. GINI DP 84: Conditional cash transfers in high- income OECD  
581 countries and their effects on human capital accumulation. *IDEAS Working Paper*  
582 *Series from RePEc* 2013
- 583 6. de Groot R, Palermo T, Handa S, et al. Cash Transfers and Child Nutrition: Pathways and  
584 Impacts. *Development Policy Review* 2017;35(5):621-43. doi: 10.1111/dpr.12255
- 585 7. Leroy J, Ruel M, Verhofstadt E. The impact of conditional cash transfer programmes on  
586 child nutrition: a review of evidence using a programme theory framework. *Journal of*  
587 *Development Effectiveness* 2009;1(2):103-29. doi: 10.1080/19439340902924043
- 588 8. Fenn B, Sangrasi GM, Puett C, et al. The REFANI Pakistan study--a cluster randomised  
589 controlled trial of the effectiveness and cost-effectiveness of cash-based transfer  
590 programmes on child nutrition status: study protocol. *BMC public health*  
591 2015;15:1044. doi: 10.1186/s12889-015-2380-3 [published Online First: 2015/10/16]
- 592 9. Debela BL, Shively G, Holden ST. Does Ethiopia's Productive Safety Net Program  
593 improve child nutrition? *Food Security* 2015;7(6):1273-89. doi: 10.1007/s12571-015-  
594 0499-9
- 595 10. Berhane G, Gilligan DO, Hoddinott J, et al. Can Social Protection Work in Africa? The  
596 Impact of Ethiopia's Productive Safety Net Programme. *Economic Development and*  
597 *Cultural Change* 2014;63(1):1-26.
- 598 11. Gilligan DO, Hoddinott J, Taffesse AS. The Impact of Ethiopia's Productive Safety Net  
599 Programme and its Linkages. *The Journal of Development Studies*  
600 2009;45(10):1684-706. doi: 10.1080/00220380902935907
- 601 12. Kumar N. The impact of Ethiopia's Productive Safety Net Programme on the nutritional  
602 status of children: 2008–2012: International Food Policy Research Institute (IFPRI),  
603 2017.
- 604 13. Pawson R, Tilley N. Realistic evaluation. Thousand Oaks, Calif;London;: Sage 1997.
- 605 14. Iyengar S, Katz A, Durham J. Role of institutional entrepreneurship in building adaptive  
606 capacity in community-based healthcare organisations: realist review protocol. *BMJ*  
607 *Open* 2016;6(3) doi: 10.1136/bmjopen-2015-010915
- 608 15. Greenhalgh T, Humphrey C, Hughes J, et al. How Do You Modernize a Health Service?  
609 A Realist Evaluation of Whole-Scale Transformation in London. *Milbank Quarterly*  
610 2009;87(2):391-416. doi: 10.1111/j.1468-0009.2009.00562.x
- 611 16. Schierhout G, Hains J, Si D, et al. Evaluating the effectiveness of a multifaceted,  
612 multilevel continuous quality improvement program in primary health care:  
613 Developing a realist theory of change. *Implementation Science* 2013;8(1)
- 614 17. Nilsson D, Baxter G, Butler JRA, et al. How do community-based conservation programs  
615 in developing countries change human behaviour? A realist synthesis. *Biological*  
616 *Conservation* 2016;200:93-103. doi: 10.1016/j.biocon.2016.05.020
- 617 18. Gillespie B, Marshall A. Implementation of safety checklists in surgery: a realist synthesis  
618 of evidence. *Implementation Science* 2015;10
- 619 19. Gilmore B, Adams B, Bartoloni A, et al. Improving the performance of community health  
620 workers in humanitarian emergencies: a realist evaluation protocol for the PIECES  
621 programme. *BMJ Open* 2016;6(8) doi: 10.1136/bmjopen-2016-011753



1  
2  
3  
4  
5  
6  
7  
8  
9  
10  
11  
12  
13  
14  
15  
16  
17  
18  
19  
20  
21  
22  
23  
24  
25  
26  
27  
28  
29  
30  
31  
32  
33  
34  
35  
36  
37  
38  
39  
40  
41  
42  
43  
44  
45  
46  
47  
48  
49  
50  
51  
52  
53  
54  
55  
56  
57  
58  
59  
60

- 622 20. Westhorp G. Realist impact evaluation: An introduction (Methods Lab). London:  
623 Overseas Development Institute, 2014.
- 624 21. Westhorp G. Using complexity-consistent theory for evaluating complex systems.  
625 *Evaluation* 2012;18(4):405-20. doi: 10.1177/1356389012460963
- 626 22. Pawson R, Greenhalgh T, Harvey G, et al. Realist review-a new method of systematic  
627 review designed for complex policy interventions. *Journal of Health Services*  
628 *Research & Policy* 2005;10(1\_suppl):21-34.
- 629 23. Pawson R. Protocols, policy making and scientific progress. *Journal of Epidemiology and*  
630 *Community Health* (1979-) 2012;66(5):386-87. doi: 10.1136/jech-2012-201061
- 631 24. Marchal B, van Belle S, van Olmen J, et al. Is realist evaluation keeping its promise? A  
632 review of published empirical studies in the field of health systems research.  
633 *Evaluation* 2012;18(2):192-212. doi: 10.1177/1356389012442444
- 634 25. Wong G, Greenhalgh T, Westhorp G, et al. RAMESES publication standards: realist  
635 syntheses. *BMC medicine* 2013;11(1):1-14. doi: 10.1186/1741-7015-11-21
- 636 26. Pawson R. Evidence-based policy: a realist perspective. London: SAGE 2006.
- 637 27. Kastner M, Estey E, Perrier L, et al. Understanding the relationship between the  
638 perceived characteristics of clinical practice guidelines and their uptake: protocol for  
639 a realist review. *Implementation Science* 2011;6:69. doi: 10.1186/1748-5908-6-69  
640 [published Online First: 2011/07/08]
- 641 28. Hudon C, Chouinard MC, Aubrey-Bassler K, et al. Case management in primary care  
642 among frequent users of healthcare services with chronic conditions: protocol of a  
643 realist synthesis. *BMJ Open* 2017;7(9):e017701. doi: 10.1136/bmjopen-2017-017701  
644 [published Online First: 2017/09/06]
- 645 29. Papoutsis C, Hargreaves D, Colligan G, et al. Group clinics for young adults with diabetes  
646 in an ethnically diverse, socioeconomically deprived setting (TOGETHER study):  
647 protocol for a realist review, co-design and mixed methods, participatory evaluation  
648 of a new care model. *BMJ Open* 2017;7(6):e017363. doi: 10.1136/bmjopen-2017-  
649 017363 [published Online First: 2017/06/24]
- 650 30. Cooper C, Lhussier M, Shucksmith J, et al. Protocol for a realist review of complex  
651 interventions to prevent adolescents from engaging in multiple risk behaviours. *BMJ*  
652 *Open* 2017;7(9) doi: 10.1136/bmjopen-2016-015477
- 653 31. Wiese A, Kilty C, Bergin C, et al. Protocol for a realist review of workplace learning in  
654 postgraduate medical education and training. *Systematic Reviews* 2017;6(1) doi:  
655 10.1186/s13643-017-0415-9
- 656 32. Menear M, Gervais M, Careau E, et al. Strategies and impacts of patient and family  
657 engagement in collaborative mental healthcare: Protocol for a systematic and realist  
658 review. *BMJ Open* 2016;6(9) doi: 10.1136/bmjopen-2016-012949
- 659 33. Booth V, Harwood R, Hood V, et al. Understanding the theoretical underpinning of the  
660 exercise component in a fall prevention programme for older adults with mild  
661 dementia: A realist review protocol. *Systematic Reviews* 2016;5(1) doi:  
662 10.1186/s13643-016-0212-x
- 663 34. Coles E, Wells M, Maxwell M, et al. The influence of contextual factors on healthcare  
664 quality improvement initiatives: What works, for whom and in what setting? Protocol  
665 for a realist review. *Systematic Reviews* 2017;6(1) doi: 10.1186/s13643-017-0566-8
- 666 35. Groot G, Waldron T, Carr T, et al. Development of a program theory for shared decision-  
667 making: A realist review protocol. *Systematic Reviews* 2017;6(1) doi:  
668 10.1186/s13643-017-0508-5
- 669 36. McGaughey J, O'Halloran P, Porter S, et al. Early warning systems and rapid response  
670 to the deteriorating patient in hospital: A systematic realist review. *Journal of*  
671 *Advanced Nursing* 2017;73(12):2877-91. doi: 10.1111/jan.13398
- 672 37. Zubair M, Chadborn NH, Gladman JRF, et al. Using comprehensive geriatric  
673 assessment for quality improvements in healthcare of older people in UK care  
674 homes: Protocol for realist review within Proactive Healthcare of Older People in  
675 Care Homes (PEACH) study. *BMJ Open* 2017;7(10) doi: 10.1136/bmjopen-2017-  
676 017270

- 1  
2  
3 677 38. Moher D, Shamseer L, Clarke M, et al. Preferred reporting items for systematic review  
4 678 and meta-analysis protocols (PRISMA-P) 2015 statement.(Research)(Report).  
5 679 *Systematic Reviews* 2015;4(1):1. doi: 10.1186/2046-4053-4-1  
6 680 39. Velonis AJ, Cheff R, Finn D, et al. Searching for the mechanisms of change: a protocol  
7 681 for a realist review of batterer treatment programmes. *BMJ Open* 2016;6(4) doi:  
8 682 10.1136/bmjopen-2015-010173  
9 683 40. Pawson R. Digging for Nuggets: How 'Bad' Research Can Yield 'Good' Evidence.  
10 684 *International Journal of Social Research Methodology* 2006;9(2):127-42. doi:  
11 685 10.1080/13645570600595314  
12 686 41. Mertens DM. Transformative research and evaluation: New York : Guilford Press 2009.  
13 687 42. Pace R, Pluye P, Bartlett G, et al. Testing the reliability and efficiency of the pilot Mixed  
14 688 Methods Appraisal Tool (MMAT) for systematic mixed studies review. *International*  
15 689 *Journal of Nursing Studies* 2011;49(1) doi: 10.1016/j.ijnurstu.2011.07.002  
16 690 43. Egan M, Bamba C, Petticrew M, et al. Reviewing evidence on complex social  
17 691 interventions: appraising implementation in systematic reviews of the health effects of  
18 692 organisational-level workplace interventions. 2008;63(1) doi:  
19 693 10.1136/jech.2007.071233  
20 694 44. Manley J, Gitter S, Slavchevska V. How effective are cash transfers at improving  
21 695 nutritional status? *World development* 2013;48:133-55.  
22  
23  
24 696  
25  
26 697  
27  
28 698  
29 699  
30  
31 700  
32  
33 701  
34  
35 702  
36  
37 703  
38  
39 704  
40 705  
41  
42 706  
43  
44 707  
45  
46 708  
47 709  
48  
49 710  
50  
51 711  
52  
53 712  
54  
55 713  
56  
57 714  
58 715  
59  
60

1  
2  
3  
4  
5  
6  
7  
8  
9  
10  
11  
12  
13  
14  
15  
16  
17  
18  
19  
20  
21  
22  
23  
24  
25  
26  
27  
28  
29  
30  
31  
32  
33  
34  
35  
36  
37  
38  
39  
40  
41  
42  
43  
44  
45  
46  
47  
48  
49  
50  
51  
52  
53  
54  
55  
56  
57  
58  
59  
60

716 [Figure Captions](#)  
717 Figure 1: Theoretical framework domains  
718  
719  
720  
721

For peer review only

1  
2  
3  
4  
5  
6  
7  
8  
9  
10  
11  
12  
13  
14  
15  
16  
17  
18  
19  
20  
21  
22  
23  
24  
25  
26  
27  
28  
29  
30  
31  
32  
33  
34  
35  
36  
37  
38  
39  
40  
41  
42  
43  
44  
45  
46  
47  
48  
49  
50  
51  
52  
53  
54  
55  
56  
57  
58  
59  
60

Figure 1: Theoretical framework domains

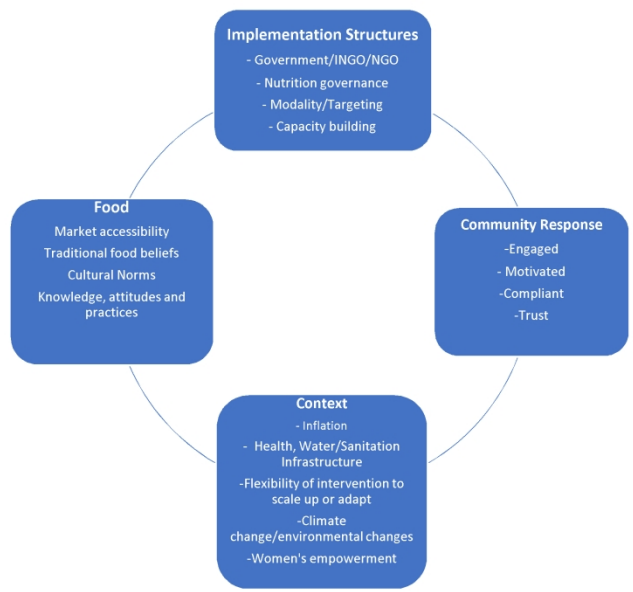

Created by Universal Document Converter

Figure 1: Theoretical framework domains

209x297mm (300 x 300 DPI)

# Reporting checklist for protocol of a systematic review.

Based on the PRISMA-P guidelines.

## Instructions to authors

Complete this checklist by entering the page numbers from your manuscript where readers will find each of the items listed below.

Your article may not currently address all the items on the checklist. Please modify your text to include the missing information. If you are certain that an item does not apply, please write "n/a" and provide a short explanation.

Upload your completed checklist as an extra file when you submit to a journal.

In your methods section, say that you used the PRISMA-P reporting guidelines, and cite them as:

Moher D, Shamseer L, Clarke M, Ghersi D, Liberati A, Petticrew M, Shekelle P, Stewart LA. Preferred Reporting Items for Systematic Review and Meta-Analysis Protocols (PRISMA-P) 2015 statement. Syst Rev. 2015;4(1):1.

|                |     |                                                                                    | Page   |
|----------------|-----|------------------------------------------------------------------------------------|--------|
|                |     | Reporting Item                                                                     | Number |
| Identification | #1a | Identify the report as a protocol of a systematic review                           | 1      |
| Update         | #1b | If the protocol is for an update of a previous systematic review, identify as such | N/A    |

|    |                      |     |                                                                 |     |
|----|----------------------|-----|-----------------------------------------------------------------|-----|
| 1  |                      | #2  | If registered, provide the name of the registry (such as        | 1   |
| 2  |                      |     | PROSPERO) and registration number                               |     |
| 3  |                      |     |                                                                 |     |
| 4  |                      |     |                                                                 |     |
| 5  |                      |     |                                                                 |     |
| 6  | Contact              | #3a | Provide name, institutional affiliation, e-mail address of all  | 1   |
| 7  |                      |     | protocol authors; provide physical mailing address of           |     |
| 8  |                      |     | corresponding author                                            |     |
| 9  |                      |     |                                                                 |     |
| 10 |                      |     |                                                                 |     |
| 11 |                      |     |                                                                 |     |
| 12 |                      |     |                                                                 |     |
| 13 |                      |     |                                                                 |     |
| 14 | Contribution         | #3b | Describe contributions of protocol authors and identify the     | 13  |
| 15 |                      |     | guarantor of the review                                         |     |
| 16 |                      |     |                                                                 |     |
| 17 |                      |     |                                                                 |     |
| 18 |                      |     |                                                                 |     |
| 19 |                      |     |                                                                 |     |
| 20 |                      | #4  | If the protocol represents an amendment of a previously         | N/A |
| 21 |                      |     | completed or published protocol, identify as such and list      |     |
| 22 |                      |     | changes; otherwise, state plan for documenting important        |     |
| 23 |                      |     | protocol amendments                                             |     |
| 24 |                      |     |                                                                 |     |
| 25 |                      |     |                                                                 |     |
| 26 |                      |     |                                                                 |     |
| 27 |                      |     |                                                                 |     |
| 28 |                      |     |                                                                 |     |
| 29 | Sources              | #5a | Indicate sources of financial or other support for the review   | 13  |
| 30 |                      |     |                                                                 |     |
| 31 |                      |     |                                                                 |     |
| 32 | Sponsor              | #5b | Provide name for the review funder and / or sponsor             | N/A |
| 33 |                      |     |                                                                 |     |
| 34 |                      |     |                                                                 |     |
| 35 |                      |     |                                                                 |     |
| 36 | Role of sponsor or   | #5c | Describe roles of funder(s), sponsor(s), and / or               | N/A |
| 37 | funder               |     | institution(s), if any, in developing the protocol              |     |
| 38 |                      |     |                                                                 |     |
| 39 |                      |     |                                                                 |     |
| 40 |                      |     |                                                                 |     |
| 41 | Rationale            | #6  | Describe the rationale for the review in the context of what is | 5   |
| 42 |                      |     | already known                                                   |     |
| 43 |                      |     |                                                                 |     |
| 44 |                      |     |                                                                 |     |
| 45 |                      |     |                                                                 |     |
| 46 | Objectives           | #7  | Provide an explicit statement of the question(s) the review     | 7   |
| 47 |                      |     | will address with reference to participants, interventions,     |     |
| 48 |                      |     | comparators, and outcomes (PICO)                                |     |
| 49 |                      |     |                                                                 |     |
| 50 |                      |     |                                                                 |     |
| 51 |                      |     |                                                                 |     |
| 52 |                      |     |                                                                 |     |
| 53 |                      |     |                                                                 |     |
| 54 | Eligibility criteria | #8  | Specify the study characteristics (such as PICO, study          | 8   |
| 55 |                      |     | design, setting, time frame) and report characteristics (such   |     |
| 56 |                      |     |                                                                 |     |
| 57 |                      |     |                                                                 |     |
| 58 |                      |     |                                                                 |     |
| 59 |                      |     |                                                                 |     |
| 60 |                      |     |                                                                 |     |

|    |                   |      |                                                                |    |
|----|-------------------|------|----------------------------------------------------------------|----|
| 1  |                   |      | as years considered, language, publication status) to be       |    |
| 2  |                   |      |                                                                |    |
| 3  |                   |      | used as criteria for eligibility for the review                |    |
| 4  |                   |      |                                                                |    |
| 5  |                   |      |                                                                |    |
| 6  | Information       | #9   | Describe all intended information sources (such as             | 8  |
| 7  |                   |      |                                                                |    |
| 8  | sources           |      | electronic databases, contact with study authors, trial        |    |
| 9  |                   |      |                                                                |    |
| 10 |                   |      | registers or other grey literature sources) with planned dates |    |
| 11 |                   |      |                                                                |    |
| 12 |                   |      | of coverage                                                    |    |
| 13 |                   |      |                                                                |    |
| 14 |                   |      |                                                                |    |
| 15 |                   |      |                                                                |    |
| 16 | Search strategy   | #10  | Present draft of search strategy to be used for at least one   | 8  |
| 17 |                   |      |                                                                |    |
| 18 |                   |      | electronic database, including planned limits, such that it    |    |
| 19 |                   |      |                                                                |    |
| 20 |                   |      | could be repeated                                              |    |
| 21 |                   |      |                                                                |    |
| 22 |                   |      |                                                                |    |
| 23 | Study records -   | #11a | Describe the mechanism(s) that will be used to manage          | 11 |
| 24 |                   |      |                                                                |    |
| 25 | data management   |      | records and data throughout the review                         |    |
| 26 |                   |      |                                                                |    |
| 27 |                   |      |                                                                |    |
| 28 |                   |      |                                                                |    |
| 29 | Study records -   | #11b | State the process that will be used for selecting studies      | 9  |
| 30 |                   |      |                                                                |    |
| 31 | selection process |      | (such as two independent reviewers) through each phase of      |    |
| 32 |                   |      |                                                                |    |
| 33 |                   |      | the review (that is, screening, eligibility and inclusion in   |    |
| 34 |                   |      |                                                                |    |
| 35 |                   |      | meta-analysis)                                                 |    |
| 36 |                   |      |                                                                |    |
| 37 |                   |      |                                                                |    |
| 38 |                   |      |                                                                |    |
| 39 | Study records -   | #11c | Describe planned method of extracting data from reports        | 11 |
| 40 |                   |      |                                                                |    |
| 41 | data collection   |      | (such as piloting forms, done independently, in duplicate),    |    |
| 42 |                   |      |                                                                |    |
| 43 | process           |      | any processes for obtaining and confirming data from           |    |
| 44 |                   |      |                                                                |    |
| 45 |                   |      | investigators                                                  |    |
| 46 |                   |      |                                                                |    |
| 47 |                   |      |                                                                |    |
| 48 | Data items        | #12  | List and define all variables for which data will be sought    | 10 |
| 49 |                   |      |                                                                |    |
| 50 |                   |      | (such as PICO items, funding sources), any pre-planned         |    |
| 51 |                   |      |                                                                |    |
| 52 |                   |      | data assumptions and simplifications                           |    |
| 53 |                   |      |                                                                |    |
| 54 |                   |      |                                                                |    |
| 55 |                   |      |                                                                |    |
| 56 |                   |      |                                                                |    |
| 57 |                   |      |                                                                |    |
| 58 |                   |      |                                                                |    |
| 59 |                   |      |                                                                |    |
| 60 |                   |      |                                                                |    |

|    |                                         |                                       |                                                                                                                                            |                                                                                                                                                                                                                               |                                                                                                                                                                                                                                                                    |     |
|----|-----------------------------------------|---------------------------------------|--------------------------------------------------------------------------------------------------------------------------------------------|-------------------------------------------------------------------------------------------------------------------------------------------------------------------------------------------------------------------------------|--------------------------------------------------------------------------------------------------------------------------------------------------------------------------------------------------------------------------------------------------------------------|-----|
| 1  | Outcomes and<br>prioritization          | #13                                   | List and define all outcomes for which data will be sought,<br>including prioritization of main and additional outcomes, with<br>rationale | 12                                                                                                                                                                                                                            |                                                                                                                                                                                                                                                                    |     |
| 2  |                                         | Risk of bias in<br>individual studies | #14                                                                                                                                        | Describe anticipated methods for assessing risk of bias of<br>individual studies, including whether this will be done at the<br>outcome or study level, or both; state how this information<br>will be used in data synthesis | 11                                                                                                                                                                                                                                                                 |     |
| 3  |                                         |                                       | Data synthesis                                                                                                                             | #15a                                                                                                                                                                                                                          | Describe criteria under which study data will be<br>quantitatively synthesised                                                                                                                                                                                     | N/A |
| 4  |                                         |                                       |                                                                                                                                            | #15b                                                                                                                                                                                                                          | If data are appropriate for quantitative synthesis, describe<br>planned summary measures, methods of handling data and<br>methods of combining data from studies, including any<br>planned exploration of consistency (such as I <sup>2</sup> , Kendall's $\tau$ ) | N/A |
| 5  |                                         |                                       |                                                                                                                                            | #15c                                                                                                                                                                                                                          | Describe any proposed additional analyses (such as<br>sensitivity or subgroup analyses, meta-regression)                                                                                                                                                           | N/A |
| 6  |                                         |                                       |                                                                                                                                            | #15d                                                                                                                                                                                                                          | If quantitative synthesis is not appropriate, describe the type<br>of summary planned                                                                                                                                                                              | 12  |
| 7  |                                         |                                       | Meta-bias(es)                                                                                                                              | #16                                                                                                                                                                                                                           | Specify any planned assessment of meta-bias(es) (such as<br>publication bias across studies, selective reporting within<br>studies)                                                                                                                                | 11  |
| 8  | Confidence in<br>cumulative<br>evidence |                                       |                                                                                                                                            | #17                                                                                                                                                                                                                           | Describe how the strength of the body of evidence will be<br>assessed (such as GRADE)                                                                                                                                                                              | 6   |
| 9  |                                         |                                       |                                                                                                                                            |                                                                                                                                                                                                                               |                                                                                                                                                                                                                                                                    |     |
| 10 |                                         |                                       |                                                                                                                                            |                                                                                                                                                                                                                               |                                                                                                                                                                                                                                                                    |     |



1 The PRISMA-P checklist is distributed under the terms of the Creative Commons Attribution License  
2  
3 CC-BY 4.0. This checklist was completed on 06. November 2018 using <http://www.goodreports.org/>,  
4  
5 a tool made by the [EQUATOR Network](#) in collaboration with [Penelope.ai](#)  
6  
7  
8  
9  
10  
11  
12  
13  
14  
15  
16  
17  
18  
19  
20  
21  
22  
23  
24  
25  
26  
27  
28  
29  
30  
31  
32  
33  
34  
35  
36  
37  
38  
39  
40  
41  
42  
43  
44  
45  
46  
47  
48  
49  
50  
51  
52  
53  
54  
55  
56  
57  
58  
59  
60

For peer review only

# BMJ Open

## Cash Transfer Programmes in lower and middle-income countries, understanding pathways to nutritional change – A realist review protocol

|                                 |                                                                                                                                                                                             |
|---------------------------------|---------------------------------------------------------------------------------------------------------------------------------------------------------------------------------------------|
| Journal:                        | <i>BMJ Open</i>                                                                                                                                                                             |
| Manuscript ID                   | bmjopen-2018-028314.R1                                                                                                                                                                      |
| Article Type:                   | Protocol                                                                                                                                                                                    |
| Date Submitted by the Author:   | 01-Feb-2019                                                                                                                                                                                 |
| Complete List of Authors:       | Floate, Hilary; University of Queensland, School of Public Health<br>Marks, Geoffrey; University of Queensland, School of Public Health<br>Durham, Jo; Queensland University of Technology, |
| <b>Primary Subject Heading</b>: | Public health                                                                                                                                                                               |
| Secondary Subject Heading:      | Global health, Nutrition and metabolism, Health economics, Evidence based practice, Health policy                                                                                           |
| Keywords:                       | cash transfer programmes, realist review, nutrition status, nutrition-sensitive, children, food security                                                                                    |
|                                 |                                                                                                                                                                                             |

SCHOLARONE™  
Manuscripts

1  
2  
3  
4 1 Cash Transfer Programmes in lower and middle-income countries, understanding pathways  
5 2 to nutritional change – A realist review protocol  
6 3  
7

8 4 Floate, Hilary<sup>1</sup>; Marks, Geoffrey C.<sup>2</sup>; Durham, Jo<sup>3</sup>  
9

10 5 <sup>1</sup> The University of Queensland, School of Public Health, Herston, Qld 4006 Australia; email:  
11 6 hilary.floate@uqconnect.edu.au  
12  
13

14 7 <sup>2</sup> The University of Queensland, School of Public Health, Herston, Qld 4006 Australia; email:  
15 8 g.marks1@uq.edu.au  
16  
17

18 9 <sup>3</sup> Queensland University of Technology, School of Public Health and Social Work, Kelvin  
19 10 Grove, Qld 4059 Australia; email: joanne.durham@qut.edu.au  
20  
21

22 11 Corresponding author: [hilary.floate@uqconnect.edu.au](mailto:hilary.floate@uqconnect.edu.au)  
23  
24

25 12  
26  
27 13 Word Count: 6167 (excluding title page, abstract, references and acknowledgements)  
28  
29

30 14  
31 15 PROSPERO Registration Number: CRD42018110735  
32  
33  
34  
35  
36  
37  
38  
39  
40  
41  
42  
43  
44  
45  
46  
47  
48  
49  
50  
51  
52  
53  
54  
55  
56  
57  
58  
59  
60

## 31 **Abstract**

32 **Introduction:** Child malnutrition continues to be a significant global public health concern.  
33 Nutrition-related interventions have changed and diversified over the last two decades, with  
34 increasing emphasis on nutrition-sensitive programmes which address the underlying  
35 determinants of child malnutrition. Cash transfer programmes (CTPs) are used with increasing  
36 popularity in lower and middle-income countries to improve both food/nutrition insecurity and  
37 resilience. Available studies however, have provided mixed findings on the outcomes of CTPs  
38 on child nutritional status. This review is the first stage of a research project that will develop  
39 evidence-informed theories of the ways in which CTPs affect child malnutrition. These are to  
40 be empirically tested in the field and will contribute to a better understanding of how, why, for  
41 whom and in what circumstances CTPs can be implemented to consistently and positively  
42 influence child nutritional status.

43 **Methods and analysis:** This realist review is informed by the available standards for realist  
44 reviews and follows a five-step process. In step 1 an Initial scoping of the literature has been  
45 completed and identified potential contextual factors and underlying mechanisms that  
46 influence nutritional outcomes. This allowed us to develop potential theories to address our  
47 research question. In step 2, a systematic literature search using multiple databases will be  
48 undertaken with papers screened for inclusion using defined inclusion/exclusion criteria. In the  
49 next step, data from included studies will be used to test and further refine our explanatory  
50 framework. Data will be extracted into a bespoke data extraction tool with the fourth step using  
51 a mix of inductive and deductive analytical processes to identify patterns, link chains of  
52 inference and tracking and linking of articles. Final steps involve analysis, synthesis, and  
53 dissemination of a preliminary theory for feedback prior to empirically testing the theory in  
54 Kenya and Ethiopia where large-scale CTPs) are being implemented.

55 **Keywords:** nutrition-sensitive, cash-transfers, unconditional cash transfer, conditional cash  
56 transfer, nutrition insecurity, malnutrition, nutrition status, children, food insecurity,  
57 implementation, realist review

58

1  
2  
3  
4  
5  
6  
7  
8  
9  
10  
11  
12  
13  
14  
15  
16  
17  
18  
19  
20  
21  
22  
23  
24  
25  
26  
27  
28  
29  
30  
31  
32  
33  
34  
35  
36  
37  
38  
39  
40  
41  
42  
43  
44  
45  
46  
47  
48  
49  
50  
51  
52  
53  
54  
55  
56  
57  
58  
59  
60

## 59 Article Summary

### 60 Strengths and Limitations of this study

- 61 ➤ The use of realist review methods enables explicit examination of contextual factors  
62 and underpinning mechanisms to explain how various cash transfer programme  
63 (CTP) implementation structures, services and practices influence child nutrition  
64 outcomes
- 65 ➤ The review will develop a programme theory and a set of specific hypotheses relating  
66 context-mechanism-outcome as a summary of current understandings that can be  
67 empirically tested through the collection and analysis of primary data
- 68 ➤ The method includes a broad range of evidence from various data sources, including  
69 grey literature; while strengthening understandings of context it may also affect data  
70 quality
- 71 ➤ Realist reviews can be difficult to reproduce, we have sought to mitigate this risk  
72 through specification of criteria and approaches that support structured and  
73 reproducible decision-making
- 74 ➤ The findings will not produce generalisable effect sizes, but may be used to inform  
75 future empirical studies  
76

77

78

79

80

81

82

83

84

85

86

87

88

89

90

91

## Background

Poor nutrition in low-resource countries continues to be an underlying cause of at least one third of all child deaths and approximately twenty percent of maternal mortality annually<sup>1</sup>. Nutrition-related interventions have changed and diversified over the last two decades, with increasing emphasis on nutrition-sensitive programmes which address the underlying determinants of child malnutrition. Cash transfer programmes (CTPs) are used with increasing popularity in lower and middle-income countries to improve both food/nutrition insecurity and resilience<sup>2</sup>. Available studies however, have provided mixed findings on the outcomes of CTPs on child nutritional status<sup>3-7</sup>. This review is the first stage of a research project that will consider current evidence and understanding of CTPs to develop programme theories to summarise the ways in which CTPs affect child malnutrition. The pathways considered to be most influential and/or important will form the basis of specific hypotheses to be empirically tested in the field in subsequent work.

The numerous factors that contribute to poor child nutrition in low-income countries are summarised in a conceptual framework developed by UNICEF and categorised as basic determinants (e.g. political and economic structures), underlying (e.g. direct influences on household food security/health environment/care for mothers and children), and immediate determinants (e.g. child's dietary intake and child's health status)<sup>8</sup>. As with other social determinants of health, addressing child nutritional status requires interventions targeting not only child health, but the structural, environmental and resource related causes (i.e. underlying and basic determinants), affecting child nutritional status<sup>9</sup>. Based on this framework, interventions to improve maternal and child nutrition are typically categorised as nutrition-sensitive or nutrition-specific<sup>10</sup>. Nutrition-sensitive strategies aim to address the underlying and basic determinants of child nutritional status and include asset support and social protection initiatives as well as agricultural, infrastructure development, education programmes<sup>10</sup>. These can support nutrition-specific interventions, such as feeding programmes and typically target women of reproductive age, pregnant and lactating women and children under the age of five<sup>11</sup>. Children under the age of five years are the most vulnerable to malnutrition and associated morbidities, and the prevention of largely irreversible outcomes (i.e. failure to thrive/stunting) must be addressed in the first 1000 days of life, from conception until two years of age<sup>10</sup>.

Over the last two decades, external donors, policy makers and national governments of low- and middle-income countries have increasingly used social protection programmes, including cash transfers, in combination with other targeted programmes to alleviate chronic and acute food and nutrition insecurity and the underlying social determinants of health in vulnerable populations<sup>12 13</sup>. CTPs are non-contributory social protection programmes that provide monetary transfers to low-income households seeking to health and welfare decisions and outcomes through an 'income effect', and through this to break the 'intergenerational cycle of poverty'<sup>13-15</sup>. They can be categorised into two groups, conditional cash transfers (CCTs) or unconditional cash transfers (UCTs)<sup>14</sup>. The monetary transfers for CCTs are conditioned on recipients complying with a set of behavioural requirements, generally addressing financial barriers associated with accessing social services, such as school enrolment/attendance or health services<sup>13 14</sup>. UCTs also target low-income individuals or households with monetary transfers but do not require recipients to meet a set of conditions<sup>14</sup>. CTPs can also include a combination of monetary transfers and in-kind assistance (e.g. food rations) and vouchers (for food or other commodities<sup>14 16</sup>). The modality and duration of CTPs differ by context. CTPs for assistance in humanitarian disasters are often one-time/short duration and focus on short-term objectives (e.g. relief from a disaster). A second modality of CTPs are regular and ongoing cash transfers in development settings focused upon poverty reduction and addressing vulnerabilities with a possible graduation

1  
2  
3 142 from the programme<sup>14</sup>. Other contextual factors that influence the CTP include the social  
4 143 policy environment, availability and accessibility of complementary health and welfare  
5 144 services, socio-demographics of the population, existing behaviours of recipients, and  
6 145 organisational capability and capacity<sup>14</sup>. The nutritional objectives also differ by context with  
7 146 short-term programmes in a humanitarian context generally framed as addressing acute  
8 147 nutritional outcomes such as a reduction in child wasting, while the ongoing programs  
9 148 generally identify longer term nutritional outcomes such as ameliorating child stunting.

11  
12 149 Latin American countries, including Mexico and Brazil, were among the first lower and  
13 150 middle-income countries to implement CCTs to reduce financial barriers to accessing  
14 151 services for low-income individual and households<sup>16-18</sup>. Introduced in the late 1990s, impact  
15 152 evaluations and systematic reviews conducted since have demonstrated positive impacts on  
16 153 access to health and nutrition services and poverty reduction, however, there have been  
17 154 mixed results regarding child nutrition outcomes<sup>3 19</sup>. With the increasing uptake of CTPs in  
18 155 lower income contexts, such as sub-Saharan Africa and Asia, further studies have  
19 156 demonstrated positive outcomes of CTPs on household food security, food consumption,  
20 157 agricultural yields, poverty reduction and asset protection<sup>3 5-7 20-23</sup> yet expected nutrition  
21 158 benefits (e.g. reduction in wasting and stunting rates of children under five) have not been  
22 159 clearly demonstrated.

23  
24  
25 160 Several research teams have considered this issue<sup>1 3 24 25</sup>. Whilst the studies differ in purpose,  
26 161 design and approach, they each propose pathways by which increased income and/ or  
27 162 financial incentives can affect the underlying determinants of child nutrition status and identify  
28 163 various mediating, moderating or modifying variables that may influence the effect of each  
29 164 pathway on the immediate determinants of child nutrition.

30  
31 165 The framework by de Groot et al<sup>25</sup>, for example, suggests ways that the addition of financial  
32 166 resources can influence the underlying determinants of child nutrition through the three  
33 167 pathways of food security, health and care. The model presented by Leroy and colleagues<sup>3</sup>,  
34 168 although focussed on the impact pathways of CCTs, has similarities to the de Groot  
35 169 conceptual framework. Leroy and colleagues outline how the addition of financial resources  
36 170 can make it easier for a household to purchase higher quantities and quality of food (HH food  
37 171 security), increase access to health services (health) and increase women's control over  
38 172 income and empowerment (care). Each framework highlights possible  
39 173 mediating/moderating/modifying variables that could interrupt the underlying pathways  
40 174 influence the immediate determinants of child nutrition -- shocks, feeding practices and feeding  
41 175 styles, women's time (e.g. additional travel required to collect cash and meet conditions of  
42 176 CCTs), availability of food and food prices, and existing resources for health, can have either  
43 177 positive or negative influences on the impact of cash transfers on child nutrition. The REFANI  
44 178 theory-of-change<sup>24</sup> also maps the pathways, but provides a deeper insight into household  
45 179 choices related to income use and how these might activate mechanisms of change to  
46 180 generate nutrition-related outcomes. The researchers<sup>2 3 5 6 24 25</sup> have identified several gaps in  
47 181 knowledge that warrant further research, examples include; caregiver behaviour (including  
48 182 feeding practices), quality of health and nutrition services, child dietary intake and dietary  
49 183 diversity, individual food security, the costing and cost-effectiveness of cash transfers in the  
50 184 reduction of child undernutrition.

51  
52  
53  
54  
55 185 While each of the models incorporate overarching contextual factors, how context affects the  
56 186 pathways to generate outcomes remains underdeveloped. This is an important gap as  
57 187 implementation structures and programme environments for CTPs with nutrition objectives are  
58 188 heterogeneous. The systems for implementation for example, may include multiple  
59 189 government and non-government agencies and be provided to a diverse range of recipients.

1  
2  
3 190 Cash transfers take numerous forms – conditional/ unconditional cash transfers/ in-kind  
4 191 assistance/vouchers. Further, access to complementary health and welfare services varies.

6 192 Using a realist approach to develop an initial programme theory, the evaluation conducted by  
7 193 Owusu et al<sup>14</sup> of cash transfers and the social determinants of health in Ghana expands the  
8 194 knowledge of the interplay between context, potential mechanisms, and health outcomes. The  
9 195 authors hypothesise that CTPs have a strong impact on poverty reduction and improve access  
10 196 to services, however, significant changes are needed to improve programme impacts on the  
11 197 social determinants of health<sup>14</sup>. The recommended changes are similar to the findings from  
12 198 the nutrition research (i.e. addressing household motivation, risk-taking behaviour,  
13 199 intersectoral collaboration, programme awareness). The authors provide a programme theory  
14 200 that can be tested and refined in future studies, such as for the realist review proposed herein.

17 201 As discussed in the paper by Floate et al<sup>26</sup> the use of a realist approach in combination with a  
18 202 theory-of-change (e.g. the REFANI theory-of-change) can assist in identifying underlying  
19 203 mechanisms and explore the interplay with contextual factors that result in both planned and  
20 204 unplanned outcomes. While re-examining the frameworks from earlier research using a realist  
21 205 enquiry, we will extend them by explicitly considering how the various CTP programme  
22 206 elements and implementation structures influence the pathways that affect the determinants  
23 207 of child nutrition.

25 208 The review and evidence synthesis outlined in this protocol is the first stage of a research  
26 209 project that employs a theory-driven realist approach<sup>27</sup>. The programme theories developed  
27 210 in this review will be empirically tested in Kenya and Ethiopia (currently implementing large-  
28 211 scale CTPs). To our knowledge this is the first realist review of the impact of CTPs on child  
29 212 nutrition status.

## 31 213 **Methods**

### 32 214 **Realist Review Methodology**

33 215 The realist approach to synthesising evidence has become accepted as a rigorous alternative  
34 216 method to systematic reviews, where the intent is to understand causation. Other forms of  
35 217 systematic reviews were investigated (e.g. meta-analysis), however, while providing  
36 218 information on outcomes, other methods often fail to explain how or why programmes worked  
37 219 and do not easily account for the complexity found in real-world nutrition related CTPs<sup>28</sup>.

39 220 Publication standards have been issued by the RAMESES (Realist and Meta-Narrative  
40 221 Evidence Synthesis: Evolving Standards) project, and realist reviews are utilised with greater  
41 222 frequency in complex intervention evaluations, such as CTPs<sup>14 29-31</sup>. The approach is a theory-  
42 223 based approach to understanding ‘what works for whom in what circumstances’ and  
43 224 importantly, *why and in what context?*<sup>27</sup>.

44 225 The realist approach as proposed by Pawson and Tilley<sup>27</sup>, is based on a specific philosophical  
45 226 approach, that is, realism and more specifically, scientific realism, sitting somewhere between  
46 227 positivism (the belief that knowledge must be scientifically tested with systematic  
47 228 mathematical or logical proof) and constructivism (the theory that knowledge is constructed  
48 229 by humans through their own experiences)<sup>32 33</sup>. The approach is based on the understanding  
49 230 that there is a social reality, but this is socially constructed. Outcomes (O) are generated by  
50 231 mechanism(s) (M) that are triggered within certain contexts (C). The mechanism(s) from a  
51 232 realist perspective (in socially contingent interventions) is usually hidden and is the reaction  
52 233 or response of people to resources introduced by the intervention within a certain context and  
53 234 can be enabling or disabling. Context relates to the setting in which the programme operates,  
54 235 including systems such as health, political, environmental, and social systems. The context



236 can have several layers and can be separated into the outer and inner contexts of an  
237 intervention.

238 In a realist approach, the researcher seeks to understand interventions through the concept  
239 of generative causation that is hypothesised and tested through context-mechanism-  
240 configurations (CMOs)<sup>34</sup>. A key task for the researcher is to identify situations where  
241 interventions have had effective and/or ineffective implementation, achieving either planned  
242 or unplanned outcomes, and to examine the causes of these<sup>35</sup>. Typically, to achieve this  
243 differentiation, potential theories (or candidate theories) of the context, mechanisms and  
244 outcomes in which a programme is or will be implemented are generated throughout the  
245 review, to account for the processes of an intervention that lead to an outcome<sup>36</sup>. CMO  
246 configurations and potential theories are then analysed to inform the creation of protocols for  
247 data collection for the review and analysis. Realist evaluations typically use data from various  
248 sources, including qualitative, quantitative or mixed methods studies. An evidence-informed  
249 programme theory answering the realist question of what works, for whom, under what  
250 circumstances, is the result of the inquiry<sup>27</sup>. All phases of a realist inquiry are iterative, to allow  
251 for constant refinement of potential theories and CMOs. Developing and testing CMO  
252 configurations can help ensure external validity, by enabling a level of abstraction for the  
253 theory, or theories, that can be useful in other contexts.

254 A realist synthesis, which is synonymous with the realist review, applies a realist philosophy  
255 to collate findings from various studies that are related to either a single research question or  
256 a collection of questions<sup>37 38</sup>. The steps of a realist review, as recommended by Pawson et al  
257<sup>34</sup> are as follows: 1. Clarifying the scope of the review 2. Searching for evidence 3. Appraising  
258 primary studies and extracting data 4. Synthesising evidence and drawing conclusions 5.  
259 Disseminating, implementing and evaluating. All phases of a realist inquiry are iterative, to  
260 allow for constant refinement of potential theories and CMOs. Step 1 of the review has been  
261 completed, step 2 is currently in progress.

### 262 Protocol and Review Methods

263 The approach for this protocol has been informed by peer-reviewed realist review protocols  
264 published in the last ten years, RAMESES guidelines and the work of Ray Pawson<sup>27 34 37 39-49</sup>.  
265 We conducted a search of databases such as Medline, Scopus, and Google Scholar, using  
266 search terms including "realist review" and "protocol". Our search yielded 68 records, of which  
267 8 were found to be pertinent for our review<sup>28 39-42 47 49 50</sup>. Relevant protocols were chosen based  
268 on similarities in programme contextual factors, such as national operating systems, multiple  
269 implementing agencies, multifaceted causal chains, and potential outcomes. These have  
270 informed the protocol below. The review commenced in October 2018, with completion  
271 estimated to be in June 2019.

272 To ensure rigour and relevance, we adopt accepted and validated analytic techniques for  
273 example the MMAT tool (Mixed Methods Appraisal Tool)<sup>51 52</sup>, which are described in more  
274 detail in Step 3 and 4 of this protocol. The use of these techniques will allow us to compare  
275 and consolidate key multidisciplinary implementation attributes and their relationships<sup>39</sup>. We  
276 used the PRISMA-P checklist when writing our report<sup>53</sup>.

### 277 Review objectives

278 To understand the relationships between cash transfer programmes and child nutritional  
279 status the objectives of our review are to:

- 280 1) identify the programme theories underpinning the designs of CTPs with nutrition  
281 objectives, targeting children under five and pregnant and lactating women in lower  
282 and middle-income countries;

- 1  
2  
3 283 2) identify the mechanisms that explain how CTPs affect child nutrition in lower and  
4 284 middle-income countries;  
5 285 3) examine how key contextual factors, (including implementation structures, programme  
6 286 components and recipient characteristics) interact with resources (i.e. cash transfer  
7 287 and supporting services) and participant reasoning to generate child nutrition  
8 288 outcomes;  
9 289 4) propose how and why CTPs affect, or do not affect child nutrition in lower and middle-  
10 290 income countries.

### 291 Patient and Public Involvement

292 The public and/or patients were not involved in this stage of the research project

#### 293 Step 1: Clarifying the scope of the review

294 Clarifying the scope of review involves understanding the nature and content of the intervention,  
295 including its purpose and expected outcomes or impacts. It is often undertaken using an initial  
296 literature review and in discussion with practitioners and experts in the field. The purpose of  
297 this stage is to develop a framework for examining and synthesising evidence from diverse  
298 sources<sup>34</sup> and begin to identify key words and concepts. In this review, the initial theoretical  
299 and conceptual frameworks of how nutrition sensitive programmes are theorised to influence  
300 child nutrition status were identified based on an initial review of the literature, discussions  
301 with relevant stakeholders (e.g. donors, community members, development practitioners)  
302 working in nutrition and food security and the first author's practical experience. The initial  
303 literature search revealed four potentially relevant frameworks<sup>1 3 24 25</sup>. Based on these  
304 frameworks and the UNICEF conceptual framework<sup>1 3 8 24 25</sup>, and complemented by  
305 stakeholder interviews and practical experience, we identified common themes across the  
306 frameworks and possible gaps in knowledge. We then mapped the proposed pathways and  
307 underlying assumptions of how CTPs influence child nutritional status in a conceptual framing  
308 exercise (using the UNICEF and other relevant frameworks as our foundation) and then began  
309 the process of identifying potential CMO configurations and potential theories. The results  
310 included several possible CMOs, and a series of If/Then statements to facilitate in the creation  
311 of theories. The CMOs have been categorised into four main domains, that were chosen  
312 through the grouping of common concepts and themes. The four main domains are  
313 implementation structures, contextual influences, food systems and community response, as  
314 represented in Figure 1. Implementation practices have been identified as a key contributing  
315 factor in CTPs achieving nutrition outcomes. Therefore, this review will also draw on the  
316 practical concepts of implementation research guidelines<sup>54</sup> to help with our understanding of  
317 what elements of CTPs contribute to planned or unplanned outcomes.

318 An example of two of our hypothesised CMOs and potential theories categorised under the  
319 domain of implementation structures and associated capacity building category are as follows:

- 320 • Nutrition education provided by a health professional (C), who is skilled in  
321 behaviour change techniques (resource M) and able to create nutrition  
322 awareness in recipients (response M) that will ensure CTP recipients provide  
323 food to their children in sufficient quantity and diversity and prevent/treat  
324 diseases, reducing chronic malnutrition rates in children under five (O)
- 325 OR
- 326 • Nutrition education provided by CTP employees (e.g. government workers or  
327 programme monitors) (C), unskilled in behaviour change techniques but trained  
328 in CTP protocols (resource M), deliver appropriate nutrition messages and  
329 health-seeking advice, guaranteeing CTP recipients diversify their child's daily

330 dietary intake and prevent diseases (response M), reducing chronic  
331 malnutrition rates in children under the age of five (O)

## 332 Step 2: Searching for relevant evidence

333 Following specification of our potential programme theories, the next stage will be to identify  
334 relevant literature to further develop and test the theories. The aim is to identify a broad range  
335 of studies (including quantitative, qualitative and mixed methods) relating to CTPs and the  
336 programme theories<sup>55</sup>. The ways in which we will undertake this step are described below.

### 337 Literature search strategy

338 Following the RAMESES guidelines for a realist review, in this step we will undertake an  
339 iterative approach to searching for relevant literature, allowing relevant new studies to be  
340 included continuously into findings and the overall synthesis.

341 We expect databases such as Medline, ProQuest, Cochrane, Scopus, Web of Science,  
342 Business Source Complete, EconLit and Google Scholar to be most instrumental in our search  
343 of the extant literature. Reports and unpublished papers from the 'gray' literature will be  
344 sourced from websites such as the World Bank, UNICEF, WFP, WHO, FAO, 3ie Impact  
345 Database, Transfer Project DFID and USAID. The search will be conducted in English, the  
346 potential theories and possible CMOs have informed the selection of search terms, including  
347 for example: cash transfer, nutrition, children, pregnant and lactating women, women of  
348 reproductive age, nutrition sensitive, conditional cash transfer, unconditional cash transfer,  
349 social safety nets, financial incentives, food security, food consumption, dietary diversity,  
350 acute, chronic malnutrition, low-income, middle-income, social protection, implementation,  
351 World Bank, WFP, UNICEF, WHO, DFID, USAID. The search strategy will include variations  
352 of the following examples of term combinations:

- 353 • "cash transfers" AND "nutrition"
- 354 • "cash transfers" AND "nutrition" AND "children"
- 355 • "cash transfers" OR "social safety nets" OR "financial incentives" AND "nutrition" OR  
356 "nutritional status"
- 357 • "cash transfers" OR "conditional cash transfer" OR "unconditional cash transfer" AND  
358 "nutrition"
- 359 • "cash transfers" AND "food security"

360 All searches will be limited to those published from 1990 (reflecting the start of Latin American  
361 CTP programmes, where the first large-scale conditional cash transfers were implemented) to  
362 present.

### 363 Inclusion and exclusion criteria

364 As per the realist approach, in this study, we are less concerned with whether an evaluation  
365 meets traditional epidemiological methodological standards, (e.g. must be a randomised  
366 controlled trial or case-control trial), but rather what type of information may be gathered from  
367 studies about how, why and for whom CTPs achieve nutritional change, and under what  
368 circumstances. Our inclusion and exclusion criteria have been designed to reflect this, by  
369 including a variety of studies regardless of study design. The studies will be included or  
370 excluded based on the following criteria:

#### 371 Included

- 372 1) programmes targeting children under the age of five, including pregnant and lactating  
373 women;
- 374 2) centrally managed programmes implemented through various systems, including  
375 national governments, international agencies and non-government organisations;

- 1  
2  
3 376 3) programmes in humanitarian/relief and development settings with multiple sites;  
4 377 4) programmes targeting underlying determinants of malnutrition (aspects of food  
5 378 security, health and care) with reduction of malnutrition as a primary objective  
6  
7 379 5) programmes measuring at least one nutrition outcome or an immediate determinant  
8 380 (such as diet, nutritional supplementation rate or associated morbidities).

9  
10 381 **Excluded**

- 11 382 1) programmes targeting school-aged children, adolescents, and adults (except pregnant  
12 383 and lactating women (PLWs))  
13 384 2) welfare programmes in high income countries

14  
15 385 **Article Screening**

16 386 One reviewer will generate a list of articles and abstracts (if available), based on the search  
17 387 strategy mentioned above. These will be separated among the review team, consisting of two  
18 388 reviewers (HF, GM) and titles and abstracts will be reviewed by individual reviewers to see if  
19 389 they 1) focused on CTPs (regardless of modality) and if 2) they appear to fit with the  
20 390 inclusion/exclusion criteria. Reviewers will list the articles as 'include', 'exclude' and 'maybe'  
21 391 <sup>50</sup>. In the absence of an abstract, titles of articles will be used to determine if they are  
22 392 appropriate for review (e.g. mention of CTPs and nutrition outcomes). If the title is ambiguous,  
23 393 the article will remain in the 'maybe' group for the next stage of the review. As described by  
24 394 Velonis<sup>50</sup>, we will ensure inner-rater reliability, through a randomly selected number of article  
25 395 titles and abstracts, each being reviewed independently to determine if the study should be  
26 396 included. In the case of discrepancies, agreements will be reached collectively.

27  
28  
29 397 Following the initial screening, articles that have been labelled 'included' and 'maybe' will be/  
30 398 reviewed a second time by the reviewers. Once completed, the reviewers will discuss and  
31 399 collate results, in cases where an article has been 'included' by one reviewer and 'excluded'  
32 400 by the second reviewer, reasoning will be discussed, and a consensus reached, where  
33 401 consensus cannot be reached a third reviewer will be brought into the discussion.

34  
35 402 The complete article or paper included at this stage, will then be obtained for the final stage  
36 403 of the screening. Inter-rater reliability will be assessed again by having the reviewers read the  
37 404 same randomly selected five articles, make their own recommendations on inclusion and  
38 405 exclusion, then meet to discuss as a group. Results will be discussed collectively between the  
39 406 reviewers to ascertain any differences between findings, points of difference in categorisation  
40 407 will be discussed and consensus reached mutually. The remaining articles will be distributed  
41 408 amongst the reviewers and skim read to make a final decision as to their inclusion or exclusion,  
42 409 findings will again be shared, and consensus reached. Articles will be used as input for step 3  
43 410 of the review.

44  
45  
46 411 **Step 3: Appraising primary studies and extracting data**

47 412 This step seeks to refine our programme theories and CMOs following the initial screening of  
48 413 the literature as outlined in steps 1 and 2 of the protocol as per RAMESES and Pawson  
49 414 recommendations for realist reviews <sup>34 42</sup>. In this step we will seek to review the articles  
50 415 identified in step 2 and consider them in relation to our programme theories for integrity,  
51 416 adjudicate between rival programme theories and review the same theories in comparative  
52 417 settings <sup>34</sup>. These three strategies will facilitate in the consolidation of our programme theories.  
53 418 A final literature search, quality appraisal and data extraction of included studies is also  
54 419 included in this step of the review. For the quality appraisal, where appropriate, the MMAT  
55 420 (Mixed Methods Appraisal Tool)<sup>51 52</sup> will be used to evaluate rigour and credibility of relevant  
56 421 evidence we extract from each study has been generated.

57  
58  
59  
60 422

1  
2  
3 423 1) Reviewing for programme theory integrity

4 424 The purpose of this strategy is to study how programmes have been implemented in  
5 425 what contexts and what results they have generated for whom. According to Pawson  
6 426 et al <sup>34</sup>, in a realist synthesis, this strategy can aid in the discovery of typical weak  
7 427 points in the history of the programme under review. For this review, this will mean for  
8 428 example, examining the history of CTPs to identify if changes and deviations in  
9 429 implementation structures have had an influence on child nutrition outcomes.

10 430  
11 431 For example (hypothesised theory):

- 12 432  
13 433 • CTPs implemented by national governments without external support (C) using  
14 434 standardised CTP protocols and clear guidelines with nutrition objectives (M  
15 435 resource), ensuring CTP implementers have a clear understanding of  
16 436 programme priorities and how to deliver them (M response), are more  
17 437 successful in changing traditional food beliefs (O).

18 438 2) Reviewing to adjudicate between rival programme theories

19 439 The purpose of this strategy is to identify which variations of mechanisms are most  
20 440 successful in driving different outcomes, by uncovering evidence from competing  
21 441 programme theories <sup>34</sup>. The conceptual frameworks, potential theories and CMOs  
22 442 identified in Step 1 of the review, highlight the numerous possible pathways a CTP  
23 443 may improve child nutrition status. By adjudicating between rival programme theories,  
24 444 we will elicit key causal factors that may be driving changes in outcomes in large-scale  
25 445 CTPs, through analysis of both relevant literature and consultation with a range of  
26 446 stakeholders, to identify what works for whom in what circumstances.

27 447  
28 448 For example (hypothesised theory):

- 29 449 • CTPs provided with nutrition education training (C) are more successful in  
30 450 improving maternal child care practices (O), when delivered by a local  
31 451 midwife/traditional birth attendant (M resource) as women are more likely to  
32 452 trust messages given by established community members (M response).  
33 453 OR  
34 454 • CTPs delivered through condition of attendance to maternal child health  
35 455 services (C), ensure women will improve child care practices (O) or they will  
36 456 not receive monthly cash payments (M resource) and positive nutrition  
37 457 awareness (M response) will only be achieved through constant monitoring.

38 458  
39 459 3) Reviewing the same theory in comparative settings

40 460 This strategy addresses the core of realist evaluation to identify patterns in the context  
41 461 in which interventions interact with participant reasoning to generate outcomes <sup>34</sup>. Our  
42 462 theories will be compared between settings with similar CTP modalities in terms of the  
43 463 four domains highlighted in Figure 1.

44 464  
45 465 For example (hypothesised theory):

- 46 466 • Conditional CTPs implemented by national and local governments (C) ensure  
47 467 attendance at MCH clinics for health and nutrition screening, provided by skilled  
48 468 health professionals (M resource), recipients will attend and receive nutrition  
49 469 education, creating positive behaviour change (M response) that will improve  
50 470 the nutrition status of children in recipient households (O).

51 471 OR

- Unconditional CTPs provided by INGOs and NGOs (C), with positive implementation histories, will provide nutrition education programmes in conjunction with cash transfers, through skilled outreach workers (M resource) who are trusted by the community (M response) and diversify diets for children in recipient households (O).

### Revisiting the literature

The purpose of a literature search in this step of the review is to further explore evidence from a wide range of programmes, including empirical studies, policy and protocol documents, evaluations, systematic reviews, gray literature (non-peer reviewed documents) from the field (e.g. programme proposals, monitoring reports and donor updates) that will add to the search from step 2 in the development of our programme theories. The search in this phase will be more purposive in nature than in step 2. Reference and citation searches from articles identified in step 2 will be tracked through 'snowballing' search techniques to identify additional documents<sup>34</sup>. Additional articles will be selected at this stage according to whether they add to our emerging theories or areas of explanatory potential in terms of context, mechanism and outcome patterns<sup>42</sup>. New targeted search terms, not included in the original search will be used in this stage of the literature search, as per realist evidence searching recommendations<sup>42 56</sup>.

Searching for new documents will end at the point of theoretical saturation, that is, when we have established there is sufficient evidence to confirm a preliminary theory for testing in the field<sup>37</sup>.

Agency project proposals, donor progress reports, protocol documents and descriptive evaluations will also be used in the identification of effective or ineffective implementation practices.

### Quality appraisal and Data Extraction

One reviewer (HF) has commenced searching databases as per step 2 of the protocol and article screening has commenced. Articles and documents will be appraised by two reviewers (HF, GM), independently using the inclusion/exclusion criteria described earlier.

Realist reviews require the use of a wide range of documents to contribute to the development of programme theories with quality appraisal conducted throughout the review process. Documents or parts of documents therefore are not excluded based on methodological quality but on relevance and rigour<sup>57</sup>. In realist syntheses, unlike a traditional systematic review, an assessment occurs in conjunction with the assessment of the study's relevance and related 'programme theories' and if the methods utilised to generate the data, or related 'programme theories' were appropriate. In other words, in this study we will seek and use different fragments of evidence within each study that are relevant to our programme theories. Each fragment of evidence will be appraised, as it is extracted, for its relevance to theory building and if the methods used to generate the data are trustworthy and credible.

Where appropriate, the MMAT (Mixed Methods Appraisal Tool)<sup>51 52</sup> will be used in our assessment of rigour and credibility of the way in which the fragments of evidence we extract from each study have been generated. The MMAT tool is recommended by RAMESES to appraise the quality of data extracted from studies as it can be applied to studies that use quantitative, qualitative and mixed methods and has been independently tested for efficiency and reliability<sup>28 51 58</sup>. The principle researcher (HF) will lead the process and will share and discuss the emerging synthesis with the other two researchers (GF, JD). In addition, JD will review approximately 10% of included papers and evaluate the extracted data using the

1  
2  
3 519 MMAT tool. Implementation practices have been identified as one of the key influencing  
4 520 factors for CTPs to achieve nutrition outcomes in our potential programme theories, therefore,  
5 521 we will also use as appropriate, the Egan et al.<sup>59</sup> implementation appraisal checklist to guide  
6 522 our appraisal of the quality of reporting of implementation practices from the articles included  
7 523 in our review. The checklist will require some modification due to differing contexts. However,  
8 524 several themes from the Egan et al. checklist are consistent with the organisational-level  
9 525 workplace interventions of the CTPs we are evaluating (e.g. motivation, theory-of-change,  
10 526 employee support, resources provided, differential effects and population characteristics)<sup>59</sup>.  
11 527 These techniques and tools will only be applied to the relevant aspects of the studies that  
12 528 relate to our programme theories rather than the study as a whole<sup>28</sup>.

15 529 Data extraction will focus on key context, mechanism and outcome findings that will contribute  
16 530 to the further development and refinement of CMO configurations and programme theories.  
17 531 Two reviewers (HF, GM) will independently read each source in full, identifying data that will  
18 532 contribute to theory building A bespoke excel spreadsheet will be developed for extracting  
19 533 data and will be formulated and agreed on between the reviewers. The study reviewers will  
20 534 use the spreadsheet to record data relevant to theory building and may include for example,  
21 535 information such as: 1) document bibliographic information 2) country of study/document, 3)  
22 536 the type of CTP , 4) what nutrition outcomes are measured and how they are measured, 5)  
23 537 what proximal outcomes (e.g. improved maternal child care practices through nutrition  
24 538 education support) are measured and how they are measured, 6) contextual factors that are  
25 539 mentioned in the article, 7) mechanisms that lead to outcomes that are mentioned in the  
26 540 article, 8) the study design, 9) the relevance to theory building and 10) the credibility of the  
27 541 methods used to generate the fragments of evidence extracted from the individual studies.  
28 542 When extracting data, if an article does not include all aspects of the theory or data relevant  
29 543 to a question 'Not reported' will be recorded. Where direct quotations are extracted the page  
30 544 number from which the quote was taken will be noted.

34 545 The reviewers will pilot the data extraction sheet by independently extracting data from  
35 546 approximately ten articles and discuss results, the spreadsheet may need modification  
36 547 following piloting. Data will be managed using Microsoft Excel, an annotated notebook will be  
37 548 kept ensuring an audit trail of decision-making is maintained. The findings of the data  
38 549 extraction will provide an overall impression of the depth of the data available and how much  
39 550 it will contribute to our programme theories<sup>50</sup>.

#### 41 551 **Step 4: Synthesising evidence and drawing conclusions**

42 552 This step will involve the identification of recurrent patterns (or demi-regularities) in outcomes,  
43 553 mechanisms and contexts<sup>37</sup> and will be focussed on addressing our research questions

45 554 A mix of inductive and deductive analytical processes will be used to identify patterns in the  
46 555 extracted data, which will be produced in the form of If/Then statements, with the aim of linking  
47 556 the chains of inference, and tracking and linking of articles. Two reviewers (HF, GM) will  
48 557 examine the If/Then statements to identify recurring themes within mechanisms that will be  
49 558 grouped thematically (as anticipated in Figure1) as well as challenging emerging findings and  
50 559 seeking divergent examples. Though this iterative process we will formulate hypotheses,  
51 560 linking themes to chains of inference, which will subsequently be empirically tested in our field  
52 561 work.

55 562 The broader literature will also be used to inform and refine our emerging theories. For  
56 563 example theories that may be drawn on, as per the Owusu et al<sup>14</sup> realist evaluation are  
57 564 capability theory (Sen<sup>60</sup>), empowerment theory (Kabeer<sup>61</sup>) and self-determination theory  
58 565 (Ryan and Deci<sup>62</sup>). These theories will be consistent with the behavioural and structural  
59 566 mechanisms that have been identified in the causal pathways of the underlying determinants

1  
2  
3 567 of child nutrition. Literature will be located through searches of social science and health  
4 568 databases, as well reviewing the reference lists of included papers and our own libraries.  
5 569 Searches of the literature will be undertaken purposively and iteratively, with the main criterion  
6 570 the ability to refine our programme theories. Search terms for this stage will be developed with  
7 571 the research team based on the key concepts and processes suggested to have explanatory  
8 572 power within the key programme theories identified.

9  
10 573 Based on the review and analysis, the CMO configurations and aspects of programmes  
11 574 theories considered to be the most influential and/or important for nutrition outcomes will be  
12 575 identified, to be tested in research to be undertaken following this review involving primary  
13 576 data collection and consultation with experts and key programme stakeholders.

#### 14 577 **Step 5: Dissemination**

15  
16 578 The findings from the review will be presented in accordance with the RAMESES guidelines  
17 579 as recommended by Wong et al<sup>37</sup>. Findings will be published in a peer-reviewed journal. The  
18 580 results will be disseminated to policymakers, external donors, relevant governments, and  
19 581 research institutes (e.g. IFPRI), through formal or informal presentations, conferences and  
20 582 reports.

#### 21 583 **Discussion**

22  
23 584 Cash transfer programmes are inherently complex, involving numerous programme  
24 585 components, systems for implementation, aiming to produce a variety of outcomes. They are  
25 586 heterogeneous interventions, ranging from conditional cash transfers to cash and in-kind  
26 587 assistance (e.g. food aid distribution), provided in a diverse range of settings to a variety of  
27 588 recipients. In theory, CTPs should be able to achieve positive nutrition outcomes through their  
28 589 ability to influence the determinants of nutrition status and CTPs are rapidly replacing  
29 590 traditional food security programmes, as a strategy to alleviate chronic poverty for households  
30 591 vulnerable to economic shocks and to improve both food security and nutrition resilience.  
31 592 Evidence suggests CTPs have a positive impact on household food consumption and asset  
32 593 holdings. However, child nutrition outcomes are not routinely achieved through social  
33 594 protection programmes<sup>4</sup> and there are gaps in knowledge of how they can be optimally  
34 595 implemented to consistently influence child nutrition status.

35  
36 596 One of the key contributions of this review, in relation to other CTP impact evaluations and  
37 597 systematic reviews is our focus on how the various CTP programme elements and  
38 598 implementation structures can be implemented synergistically to improve nutrition status,  
39 599 rather than evaluating the impact effect on nutrition through the cash transfer itself. Our initial  
40 600 review of the literature indicates an existing and current evidence base related to CTP impact  
41 601 on both child nutrition indicators and proximal outcomes, such as household food consumption  
42 602 and maternal childcare practices. However, evaluations that also consider the influence of  
43 603 implementation structures and processes have been limited. To our knowledge this is the first  
44 604 realist review of CTPs impact on child nutrition status. The use of this approach in conjunction  
45 605 with other methods for data analysis and synthesis, will offer a deeper understanding of the  
46 606 mechanisms and contextual factors required to address the various determinants of child  
47 607 nutrition status throughout CTP implementation processes.

48  
49 608 The realist review method has limitations and findings may not be easily reproduced where  
50 609 disciplinary perspectives and judgement differs across research teams in terms of relevance  
51 610 and quality of literature identified. We have sought to address this through clear specification  
52 611 of criteria, use of validated approaches (such as the MMAT tool) and maintaining an audit trail  
53 612 throughout the review process to support structured and reproduceable decision-making. The  
54 613 strength of the realist review method is its ability to be flexible and adaptable, which suits the  
55 614 complexity of cash transfer programmes with nutrition objectives.



1  
2  
3 615 The research will inform the development of strategies to be included in CTP project design  
4 616 and implementation guidelines to produce consistent nutrition outcomes in contexts where  
5 617 cash transfer programmes are implemented with short or long term objectives.

7 618 **[Figure 1 near here]**

8 619

9  
10 620 **Ethics and dissemination**

11 621 This stage of the study will not involve primary research; however, ethical clearance has  
12 622 been sought through the University of Queensland for the next steps of the research project.  
13 623 Findings will be presented in accordance with RAMESES guidelines and published in a  
14 624 peer-reviewed journal.

15  
16 625 **Acknowledgements:**

17 626 The authors would like to thank the reviewers for their invaluable comments

18  
19 627 **Author Contributions:**

20 628 All authors contributed to the conception and design of the study, protocol and manuscript. All  
21 629 authors read and approved the final manuscript

22  
23 630 **Funding:**

24 631 This research received no specific grant from any funding agency in the public, commercial or  
25 632 non-for-profit sectors

26  
27 633 **Competing Interests:**

28 634 None to declare

29  
30 635 **Data Statement:**

31 636 This paper describes a protocol for undertaking a literature review. As such data are not yet  
32 637 available for lodging with a repository

33  
34 638

35  
36 639

37  
38 640

39  
40 641

41  
42 642

43  
44 643

45  
46 644

47  
48 645

49  
50 646

51  
52 647

53  
54 648

55  
56 649

57  
58 650

59  
60 651

60 652

## References

1. Black RE, Alderman H, Bhutta ZA, et al. Maternal and child nutrition: building momentum for impact. *Lancet* 2013;382(9890):372-75. doi: 10.1016/S0140-6736(13)60988-5
2. Fenn B, Pietzsch S, Morel J. Research on Food Assistance for Nutritional Impact (REFANI): literature review. 2015
3. Leroy J, Ruel M, Verhofstadt E. The impact of conditional cash transfer programmes on child nutrition: a review of evidence using a programme theory framework. *Journal of Development Effectiveness* 2009;1(2):103-29. doi: 10.1080/19439340902924043
4. Manley J, Gitter S, Slavchevska V. How effective are cash transfers at improving nutritional status? *World development* 2013;48:133-55.
5. Sibson VL, Grijalva-Eternod CS, Noura G, et al. Findings from a cluster randomised trial of unconditional cash transfers in Niger. *Matern Child Nutr* 2018;14(4):e12615. doi: 10.1111/mcn.12615 [published Online First: 2018/05/10]
6. Hougbe F, Tonguet-Papucci A, Altare C, et al. Unconditional Cash Transfers Do Not Prevent Children's Undernutrition in the Moderate Acute Malnutrition Out (MAM'Out) Cluster-Randomized Controlled Trial in Rural Burkina Faso. *The Journal of Nutrition* 2017;147(7):1410-17. doi: 10.3945/jn.117.247858
7. Grijalva-Eternod CS, Jelle M, Haghparsad-Bidgoli H, et al. A cash-based intervention and the risk of acute malnutrition in children aged 6-59 months living in internally displaced persons camps in Mogadishu, Somalia: A non-randomised cluster trial. *PLoS Med* 2018;15(10):e1002684. doi: 10.1371/journal.pmed.1002684 [published Online First: 2018/10/30]
8. UNICEF. Conceptual framework of the causes of malnutrition. *New York: UNICEF* 1991
9. Ruel M., Alderman H. Nutrition-sensitive interventions and programmes: how can they help to accelerate progress in improving maternal and child nutrition? *Lancet* 2013;382(9891):536. doi: 10.1016/S0140-6736(13)60843-0
10. Ruel MT, Alderman H, Maternal Child Nutr Study G. Nutrition-sensitive interventions and programmes: how can they help to accelerate progress in improving maternal and child nutrition? *Lancet* 2013;382(9891):536-51. doi: 10.1016/s0140-6736(13)60843-0
11. Bhutta Zulfiqar. A, Ahmed T, Black RE, et al. What works? Interventions for maternal and child undernutrition and survival. *The Lancet* 2008;371(9610):417-40. doi: 10.1016/S0140-6736(07)61693-6
12. Bright T, Felix L, Kuper H, et al. A systematic review of strategies to increase access to health services among children in low and middle income countries. *BMC Health Serv Res* 2017;17(1):252.
13. Lagarde M, Haines A, Palmer N. Conditional cash transfers for improving uptake of health interventions in low- and middle-income countries: a systematic review. *JAMA* 2007;298 doi: 10.1001/jama.298.16.1900
14. Owusu-Addo E, Renzaho AMN, Smith BJ. Cash transfers and the social determinants of health: Towards an initial realist program theory. *Evaluation* 2018;0(0):1356389018814868. doi: 10.1177/1356389018814868
15. Baird S, Ferreira FHG, Berk Ö, et al. Relative Effectiveness of Conditional and Unconditional Cash Transfers for Schooling Outcomes in Developing Countries: A Systematic Review. *Campbell Systematic Reviews* 2013;9(8)
16. Fiszbein, Schady, Ferreira. Conditional Cash Transfers Reducing Present and Future Poverty. Washington, DC: World Bank 2009.
17. Barbosa AL, Neves, De H, et al. Conditional cash transfer and informality in Brazil. *IZA Journal of Labor & Development* 2014;3(1):1-18. doi: <http://dx.doi.org/10.1186/s40175-014-0024-0>
18. Baird S, Ferreira FHG, Özler B, et al. Conditional, unconditional and everything in between: a systematic review of the effects of cash transfer programmes on schooling outcomes. *Journal of Development Effectiveness* 2014;6(1):1-43. doi: 10.1080/19439342.2014.890362

1  
2  
3  
4  
5  
6  
7  
8  
9  
10  
11  
12  
13  
14  
15  
16  
17  
18  
19  
20  
21  
22  
23  
24  
25  
26  
27  
28  
29  
30  
31  
32  
33  
34  
35  
36  
37  
38  
39  
40  
41  
42  
43  
44  
45  
46  
47  
48  
49  
50  
51  
52  
53  
54  
55  
56  
57  
58  
59  
60

- 703 19. Paes-Sousa R, Santos LMP, Miazaki ÉS. Effects of a conditional cash transfer programme on child  
704 nutrition in Brazil. *World Health Organization Bulletin of the World Health Organization*  
705 2011;89(7):496-503.
- 706 20. Debela BL, Shively G, Holden ST. Does Ethiopia's Productive Safety Net Program improve child  
707 nutrition? *Food Security* 2015;7(6):1273-89. doi: 10.1007/s12571-015-0499-9
- 708 21. Berhane G, Gilligan DO, Hoddinott J, et al. Can Social Protection Work in Africa? The Impact of  
709 Ethiopia's Productive Safety Net Programme. *Economic Development and Cultural Change*  
710 2014;63(1):1-26.
- 711 22. Gilligan DO, Hoddinott J, Taffesse AS. The Impact of Ethiopia's Productive Safety Net Programme  
712 and its Linkages. *The Journal of Development Studies* 2009;45(10):1684-706. doi:  
713 10.1080/00220380902935907
- 714 23. Kumar N. The impact of Ethiopia's Productive Safety Net Programme on the nutritional status of  
715 children: 2008–2012: International Food Policy Research Institute (IFPRI), 2017.
- 716 24. Fenn B, Sangrasi GM, Puett C, et al. The REFANI Pakistan study--a cluster randomised controlled  
717 trial of the effectiveness and cost-effectiveness of cash-based transfer programmes on child  
718 nutrition status: study protocol. *BMC Public Health* 2015;15:1044. doi: 10.1186/s12889-015-  
719 2380-3 [published Online First: 2015/10/16]
- 720 25. de Groot R, Palermo T, Handa S, et al. Cash Transfers and Child Nutrition: Pathways and Impacts.  
721 *Development Policy Review* 2017;35(5):621-43. doi: 10.1111/dpr.12255
- 722 26. Floate H, Durham J, Marks GC. Moving on from logical frameworks to find the 'missing middle' in  
723 international development programmes. *Journal of Development Effectiveness* 2018:1-15.
- 724 27. Pawson R, Tilley N. Realistic evaluation. Thousand Oaks, Calif;London;: Sage 1997.
- 725 28. Iyengar S, Katz A, Durham J. Role of institutional entrepreneurship in building adaptive capacity  
726 in community-based healthcare organisations: realist review protocol. *BMJ Open* 2016;6(3)  
727 doi: 10.1136/bmjopen-2015-010915
- 728 29. Greenhalgh T, Humphrey C, Hughes J, et al. How Do You Modernize a Health Service? A Realist  
729 Evaluation of Whole-Scale Transformation in London. *Milbank Q* 2009;87(2):391-416. doi:  
730 10.1111/j.1468-0009.2009.00562.x
- 731 30. Schierhout G, Hains J, Si D, et al. Evaluating the effectiveness of a multifaceted, multilevel  
732 continuous quality improvement program in primary health care: Developing a realist theory  
733 of change. *Implementation Science* 2013;8(1)
- 734 31. Nilsson D, Baxter G, Butler JRA, et al. How do community-based conservation programs in  
735 developing countries change human behaviour? A realist synthesis. *Biol Conserv*  
736 2016;200:93-103. doi: 10.1016/j.biocon.2016.05.020
- 737 32. Westhorp G. Realist impact evaluation: An introduction (Methods Lab). London: Overseas  
738 Development Institute, 2014.
- 739 33. Westhorp G. Using complexity-consistent theory for evaluating complex systems. *Evaluation*  
740 2012;18(4):405-20. doi: 10.1177/1356389012460963
- 741 34. Pawson R, Greenhalgh T, Harvey G, et al. Realist review-a new method of systematic review  
742 designed for complex policy interventions. *J Health Serv Res Policy* 2005;10(1\_suppl):21-34.
- 743 35. Pawson R. Protocols, policy making and scientific progress. *Journal of Epidemiology and*  
744 *Community Health (1979-)* 2012;66(5):386-87. doi: 10.1136/jech-2012-201061
- 745 36. Marchal B, van Belle S, van Olmen J, et al. Is realist evaluation keeping its promise? A review of  
746 published empirical studies in the field of health systems research. *Evaluation*  
747 2012;18(2):192-212. doi: 10.1177/1356389012442444
- 748 37. Wong G, Greenhalgh T, Westhorp G, et al. RAMESES publication standards: realist syntheses.  
749 *BMC Med* 2013;11(1):1-14. doi: 10.1186/1741-7015-11-21
- 750 38. Pawson R. Evidence-based policy: a realist perspective. London: SAGE 2006.
- 751 39. Kastner M, Estey E, Perrier L, et al. Understanding the relationship between the perceived  
752 characteristics of clinical practice guidelines and their uptake: protocol for a realist review.

- 1  
2  
3 753 *Implementation Science* 2011;6:69. doi: 10.1186/1748-5908-6-69 [published Online First:  
4 754 2011/07/08]
- 5 755 40. Hudon C, Chouinard MC, Aubrey-Bassler K, et al. Case management in primary care among  
6 756 frequent users of healthcare services with chronic conditions: protocol of a realist synthesis.  
7 757 *BMJ Open* 2017;7(9):e017701. doi: 10.1136/bmjopen-2017-017701 [published Online First:  
8 758 2017/09/06]
- 9 759 41. Papoutsi C, Hargreaves D, Colligan G, et al. Group clinics for young adults with diabetes in an  
10 760 ethnically diverse, socioeconomically deprived setting (TOGETHER study): protocol for a  
11 761 realist review, co-design and mixed methods, participatory evaluation of a new care model.  
12 762 *BMJ Open* 2017;7(6):e017363. doi: 10.1136/bmjopen-2017-017363 [published Online First:  
13 763 2017/06/24]
- 14 764 42. Cooper C, Lhussier M, Shucksmith J, et al. Protocol for a realist review of complex interventions  
15 765 to prevent adolescents from engaging in multiple risk behaviours. *BMJ Open* 2017;7(9) doi:  
16 766 10.1136/bmjopen-2016-015477
- 17 767 43. Wiese A, Kilty C, Bergin C, et al. Protocol for a realist review of workplace learning in  
18 768 postgraduate medical education and training. *Systematic Reviews* 2017;6(1) doi:  
19 769 10.1186/s13643-017-0415-9
- 20 770 44. Menear M, Gervais M, Careau E, et al. Strategies and impacts of patient and family engagement  
21 771 in collaborative mental healthcare: Protocol for a systematic and realist review. *BMJ Open*  
22 772 2016;6(9) doi: 10.1136/bmjopen-2016-012949
- 23 773 45. Booth V, Harwood R, Hood V, et al. Understanding the theoretical underpinning of the exercise  
24 774 component in a fall prevention programme for older adults with mild dementia: A realist  
25 775 review protocol. *Systematic Reviews* 2016;5(1) doi: 10.1186/s13643-016-0212-x
- 26 776 46. Coles E, Wells M, Maxwell M, et al. The influence of contextual factors on healthcare quality  
27 777 improvement initiatives: What works, for whom and in what setting? Protocol for a realist  
28 778 review. *Systematic Reviews* 2017;6(1) doi: 10.1186/s13643-017-0566-8
- 29 779 47. Groot G, Waldron T, Carr T, et al. Development of a program theory for shared decision-making:  
30 780 A realist review protocol. *Systematic Reviews* 2017;6(1) doi: 10.1186/s13643-017-0508-5
- 31 781 48. McGaughey J, O'Halloran P, Porter S, et al. Early warning systems and rapid response to the  
32 782 deteriorating patient in hospital: A systematic realist review. *J Adv Nurs* 2017;73(12):2877-  
33 783 91. doi: 10.1111/jan.13398
- 34 784 49. Zubair M, Chadborn NH, Gladman JRF, et al. Using comprehensive geriatric assessment for  
35 785 quality improvements in healthcare of older people in UK care homes: Protocol for realist  
36 786 review within Proactive Healthcare of Older People in Care Homes (PEACH) study. *BMJ Open*  
37 787 2017;7(10) doi: 10.1136/bmjopen-2017-017270
- 38 788 50. Velonis AJ, Cheff R, Finn D, et al. Searching for the mechanisms of change: a protocol for a realist  
39 789 review of batterer treatment programmes. *BMJ Open* 2016;6(4) doi: 10.1136/bmjopen-  
40 790 2015-010173
- 41 791 51. Pace R, Pluye P, Bartlett G, et al. Testing the reliability and efficiency of the pilot Mixed Methods  
42 792 Appraisal Tool (MMAT) for systematic mixed studies review. *Int J Nurs Stud* 2011;49(1) doi:  
43 793 10.1016/j.ijnurstu.2011.07.002
- 44 794 52. Pluye P, Gagnon M-P, Griffiths F, et al. A scoring system for appraising mixed methods research,  
45 795 and concomitantly appraising qualitative, quantitative and mixed methods primary studies  
46 796 in Mixed Studies Reviews. *Int J Nurs Stud* 2009;46(4):529-46. doi:  
47 797 <https://doi.org/10.1016/j.ijnurstu.2009.01.009>
- 48 798 53. Moher D, Shamseer L, Clarke M, et al. Preferred reporting items for systematic review and meta-  
49 799 analysis protocols (PRISMA-P) 2015 statement.(Research)(Report). *Systematic Reviews*  
50 800 2015;4(1):1. doi: 10.1186/2046-4053-4-1
- 51 801 54. Werner A. A guide to implementation research: Washington, D.C. : Urban Institute Press 2004.
- 52 802 55. Pawson R, Greenhalgh T, Harvey G, et al. Realist synthesis: an introduction. *Manchester: ESRC*  
53 803 *Research Methods Programme, University of Manchester* 2004
- 54  
55  
56  
57  
58  
59  
60

- 1  
2  
3 804 56. Pawson R. Digging for Nuggets: How 'Bad' Research Can Yield 'Good' Evidence. *International*  
4 805 *Journal of Social Research Methodology* 2006;9(2):127-42. doi:  
5 806 10.1080/13645570600595314  
6 807 57. Wong G, Westhorp G, Pawson R, et al. Realist synthesis. *RAMESES training materials London: The*  
7 808 *RAMESES Project* 2013  
8 809 58. Mertens DM. Transformative research and evaluation. New York: Guilford Press 2009.  
9 810 59. Egan M, Bambra C, Petticrew M, et al. Reviewing evidence on complex social interventions:  
10 811 appraising implementation in systematic reviews of the health effects of organisational-level  
11 812 workplace interventions. 2008;63(1) doi: 10.1136/jech.2007.071233  
12 813 60. Sen A. Development as freedom: Oxford : Oxford University Press 1999.  
13 814 61. Kabeer N. Resources, Agency, Achievements: Reflections on the Measurement of Women's  
14 815 Empowerment. *Development and Change* 1999;30(3):435-64. doi: 10.1111/1467-  
15 816 7660.00125  
16 817 62. Ryan RM, Deci EL. Self-Determination Theory and the Facilitation of Intrinsic Motivation, Social  
17 818 Development, and Well-Being. *Am Psychol* 2000;55(1):68-78. doi: 10.1037/0003-  
18 819 066X.55.1.68  
19  
20  
21  
22 820  
23

#### 821 Figure Captions

822 Figure 1: Theoretical framework domains  
823  
824  
825  
826

1  
2  
3  
4  
5  
6  
7  
8  
9  
10  
11  
12  
13  
14  
15  
16  
17  
18  
19  
20  
21  
22  
23  
24  
25  
26  
27  
28  
29  
30  
31  
32  
33  
34  
35  
36  
37  
38  
39  
40  
41  
42  
43  
44  
45  
46  
47  
48  
49  
50  
51  
52  
53  
54  
55  
56  
57  
58  
59  
60

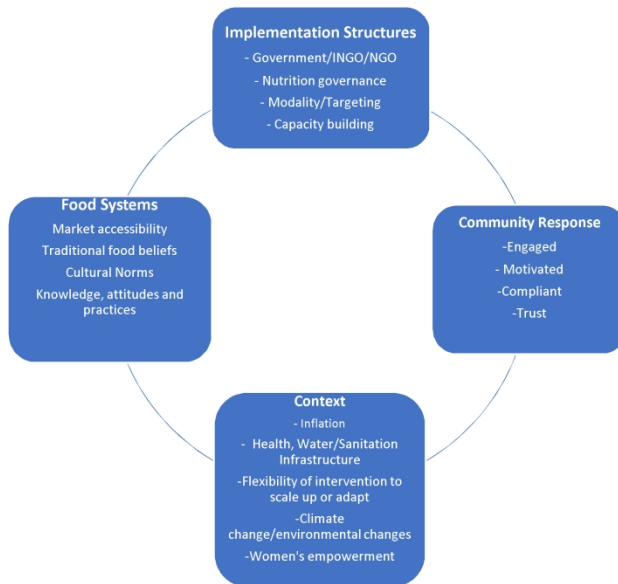

Created by Universal Document Converter

Figure 1: Theoretical Framework Domains

209x297mm (300 x 300 DPI)

# Reporting checklist for protocol of a systematic review.

Based on the PRISMA-P guidelines.

## Instructions to authors

Complete this checklist by entering the page numbers from your manuscript where readers will find each of the items listed below.

Your article may not currently address all the items on the checklist. Please modify your text to include the missing information. If you are certain that an item does not apply, please write "n/a" and provide a short explanation.

Upload your completed checklist as an extra file when you submit to a journal.

In your methods section, say that you used the PRISMA-P reporting guidelines, and cite them as:

Moher D, Shamseer L, Clarke M, Ghersi D, Liberati A, Petticrew M, Shekelle P, Stewart LA. Preferred Reporting Items for Systematic Review and Meta-Analysis Protocols (PRISMA-P) 2015 statement. Syst Rev. 2015;4(1):1.

|                |     |                                                                                    | Page   |
|----------------|-----|------------------------------------------------------------------------------------|--------|
|                |     | Reporting Item                                                                     | Number |
| Identification | #1a | Identify the report as a protocol of a systematic review                           | 1      |
| Update         | #1b | If the protocol is for an update of a previous systematic review, identify as such | N/A    |

|    |                      |     |                                                                 |     |
|----|----------------------|-----|-----------------------------------------------------------------|-----|
| 1  |                      | #2  | If registered, provide the name of the registry (such as        | 1   |
| 2  |                      |     | PROSPERO) and registration number                               |     |
| 3  |                      |     |                                                                 |     |
| 4  |                      |     |                                                                 |     |
| 5  |                      |     |                                                                 |     |
| 6  | Contact              | #3a | Provide name, institutional affiliation, e-mail address of all  | 1   |
| 7  |                      |     | protocol authors; provide physical mailing address of           |     |
| 8  |                      |     | corresponding author                                            |     |
| 9  |                      |     |                                                                 |     |
| 10 |                      |     |                                                                 |     |
| 11 |                      |     |                                                                 |     |
| 12 |                      |     |                                                                 |     |
| 13 |                      |     |                                                                 |     |
| 14 | Contribution         | #3b | Describe contributions of protocol authors and identify the     | 13  |
| 15 |                      |     | guarantor of the review                                         |     |
| 16 |                      |     |                                                                 |     |
| 17 |                      |     |                                                                 |     |
| 18 |                      |     |                                                                 |     |
| 19 |                      |     |                                                                 |     |
| 20 |                      | #4  | If the protocol represents an amendment of a previously         | N/A |
| 21 |                      |     | completed or published protocol, identify as such and list      |     |
| 22 |                      |     | changes; otherwise, state plan for documenting important        |     |
| 23 |                      |     | protocol amendments                                             |     |
| 24 |                      |     |                                                                 |     |
| 25 |                      |     |                                                                 |     |
| 26 |                      |     |                                                                 |     |
| 27 |                      |     |                                                                 |     |
| 28 |                      |     |                                                                 |     |
| 29 | Sources              | #5a | Indicate sources of financial or other support for the review   | 13  |
| 30 |                      |     |                                                                 |     |
| 31 |                      |     |                                                                 |     |
| 32 | Sponsor              | #5b | Provide name for the review funder and / or sponsor             | N/A |
| 33 |                      |     |                                                                 |     |
| 34 |                      |     |                                                                 |     |
| 35 |                      |     |                                                                 |     |
| 36 | Role of sponsor or   | #5c | Describe roles of funder(s), sponsor(s), and / or               | N/A |
| 37 | funder               |     | institution(s), if any, in developing the protocol              |     |
| 38 |                      |     |                                                                 |     |
| 39 |                      |     |                                                                 |     |
| 40 |                      |     |                                                                 |     |
| 41 | Rationale            | #6  | Describe the rationale for the review in the context of what is | 5   |
| 42 |                      |     | already known                                                   |     |
| 43 |                      |     |                                                                 |     |
| 44 |                      |     |                                                                 |     |
| 45 |                      |     |                                                                 |     |
| 46 | Objectives           | #7  | Provide an explicit statement of the question(s) the review     | 7   |
| 47 |                      |     | will address with reference to participants, interventions,     |     |
| 48 |                      |     | comparators, and outcomes (PICO)                                |     |
| 49 |                      |     |                                                                 |     |
| 50 |                      |     |                                                                 |     |
| 51 |                      |     |                                                                 |     |
| 52 |                      |     |                                                                 |     |
| 53 |                      |     |                                                                 |     |
| 54 | Eligibility criteria | #8  | Specify the study characteristics (such as PICO, study          | 8   |
| 55 |                      |     | design, setting, time frame) and report characteristics (such   |     |
| 56 |                      |     |                                                                 |     |
| 57 |                      |     |                                                                 |     |
| 58 |                      |     |                                                                 |     |
| 59 |                      |     |                                                                 |     |
| 60 |                      |     |                                                                 |     |



|    |                   |      |                                                                |    |
|----|-------------------|------|----------------------------------------------------------------|----|
| 1  |                   |      | as years considered, language, publication status) to be       |    |
| 2  |                   |      |                                                                |    |
| 3  |                   |      | used as criteria for eligibility for the review                |    |
| 4  |                   |      |                                                                |    |
| 5  |                   |      |                                                                |    |
| 6  | Information       | #9   | Describe all intended information sources (such as             | 8  |
| 7  |                   |      |                                                                |    |
| 8  | sources           |      | electronic databases, contact with study authors, trial        |    |
| 9  |                   |      |                                                                |    |
| 10 |                   |      | registers or other grey literature sources) with planned dates |    |
| 11 |                   |      |                                                                |    |
| 12 |                   |      | of coverage                                                    |    |
| 13 |                   |      |                                                                |    |
| 14 |                   |      |                                                                |    |
| 15 |                   |      |                                                                |    |
| 16 | Search strategy   | #10  | Present draft of search strategy to be used for at least one   | 8  |
| 17 |                   |      |                                                                |    |
| 18 |                   |      | electronic database, including planned limits, such that it    |    |
| 19 |                   |      |                                                                |    |
| 20 |                   |      | could be repeated                                              |    |
| 21 |                   |      |                                                                |    |
| 22 |                   |      |                                                                |    |
| 23 | Study records -   | #11a | Describe the mechanism(s) that will be used to manage          | 11 |
| 24 |                   |      |                                                                |    |
| 25 | data management   |      | records and data throughout the review                         |    |
| 26 |                   |      |                                                                |    |
| 27 |                   |      |                                                                |    |
| 28 |                   |      |                                                                |    |
| 29 | Study records -   | #11b | State the process that will be used for selecting studies      | 9  |
| 30 |                   |      |                                                                |    |
| 31 | selection process |      | (such as two independent reviewers) through each phase of      |    |
| 32 |                   |      |                                                                |    |
| 33 |                   |      | the review (that is, screening, eligibility and inclusion in   |    |
| 34 |                   |      |                                                                |    |
| 35 |                   |      | meta-analysis)                                                 |    |
| 36 |                   |      |                                                                |    |
| 37 |                   |      |                                                                |    |
| 38 |                   |      |                                                                |    |
| 39 | Study records -   | #11c | Describe planned method of extracting data from reports        | 11 |
| 40 |                   |      |                                                                |    |
| 41 | data collection   |      | (such as piloting forms, done independently, in duplicate),    |    |
| 42 |                   |      |                                                                |    |
| 43 | process           |      | any processes for obtaining and confirming data from           |    |
| 44 |                   |      |                                                                |    |
| 45 |                   |      | investigators                                                  |    |
| 46 |                   |      |                                                                |    |
| 47 |                   |      |                                                                |    |
| 48 | Data items        | #12  | List and define all variables for which data will be sought    | 10 |
| 49 |                   |      |                                                                |    |
| 50 |                   |      | (such as PICO items, funding sources), any pre-planned         |    |
| 51 |                   |      |                                                                |    |
| 52 |                   |      | data assumptions and simplifications                           |    |
| 53 |                   |      |                                                                |    |
| 54 |                   |      |                                                                |    |
| 55 |                   |      |                                                                |    |
| 56 |                   |      |                                                                |    |
| 57 |                   |      |                                                                |    |
| 58 |                   |      |                                                                |    |
| 59 |                   |      |                                                                |    |
| 60 |                   |      |                                                                |    |

|    |                                                        |                                                             |                                                                                 |     |
|----|--------------------------------------------------------|-------------------------------------------------------------|---------------------------------------------------------------------------------|-----|
| 1  | Outcomes and<br>prioritization                         | #13                                                         | List and define all outcomes for which data will be sought,                     | 12  |
| 2  |                                                        |                                                             |                                                                                 |     |
| 3  |                                                        |                                                             |                                                                                 |     |
| 4  |                                                        |                                                             | including prioritization of main and additional outcomes, with                  |     |
| 5  |                                                        |                                                             |                                                                                 |     |
| 6  |                                                        |                                                             | rationale                                                                       |     |
| 7  |                                                        |                                                             |                                                                                 |     |
| 8  | Risk of bias in<br>individual studies                  | #14                                                         | Describe anticipated methods for assessing risk of bias of                      | 11  |
| 9  |                                                        |                                                             |                                                                                 |     |
| 10 |                                                        |                                                             |                                                                                 |     |
| 11 |                                                        |                                                             | individual studies, including whether this will be done at the                  |     |
| 12 |                                                        |                                                             |                                                                                 |     |
| 13 |                                                        | outcome or study level, or both; state how this information |                                                                                 |     |
| 14 |                                                        |                                                             |                                                                                 |     |
| 15 |                                                        | will be used in data synthesis                              |                                                                                 |     |
| 16 |                                                        |                                                             |                                                                                 |     |
| 17 | Data synthesis                                         | #15a                                                        | Describe criteria under which study data will be                                | N/A |
| 18 |                                                        |                                                             |                                                                                 |     |
| 19 |                                                        |                                                             | quantitatively synthesised                                                      |     |
| 20 |                                                        |                                                             |                                                                                 |     |
| 21 |                                                        | #15b                                                        | If data are appropriate for quantitative synthesis, describe                    | N/A |
| 22 |                                                        |                                                             |                                                                                 |     |
| 23 | planned summary measures, methods of handling data and |                                                             |                                                                                 |     |
| 24 |                                                        |                                                             |                                                                                 |     |
| 25 |                                                        |                                                             | methods of combining data from studies, including any                           |     |
| 26 |                                                        |                                                             | planned exploration of consistency (such as I <sup>2</sup> , Kendall's $\tau$ ) |     |
| 27 |                                                        |                                                             |                                                                                 |     |
| 28 |                                                        | #15c                                                        | Describe any proposed additional analyses (such as                              | N/A |
| 29 |                                                        |                                                             |                                                                                 |     |
| 30 | sensitivity or subgroup analyses, meta-regression)     |                                                             |                                                                                 |     |
| 31 |                                                        | #15d                                                        | If quantitative synthesis is not appropriate, describe the type                 | 12  |
| 32 |                                                        |                                                             |                                                                                 |     |
| 33 |                                                        |                                                             |                                                                                 |     |
| 34 | of summary planned                                     |                                                             |                                                                                 |     |
| 35 |                                                        |                                                             |                                                                                 |     |
| 36 | Meta-bias(es)                                          | #16                                                         | Specify any planned assessment of meta-bias(es) (such as                        | 11  |
| 37 |                                                        |                                                             |                                                                                 |     |
| 38 |                                                        |                                                             | publication bias across studies, selective reporting within                     |     |
| 39 |                                                        |                                                             | studies)                                                                        |     |
| 40 |                                                        |                                                             |                                                                                 |     |
| 41 | Confidence in<br>cumulative<br>evidence                | #17                                                         | Describe how the strength of the body of evidence will be                       | 6   |
| 42 |                                                        |                                                             |                                                                                 |     |
| 43 |                                                        |                                                             |                                                                                 |     |
| 44 |                                                        |                                                             | assessed (such as GRADE)                                                        |     |
| 45 |                                                        |                                                             |                                                                                 |     |
| 46 |                                                        |                                                             |                                                                                 |     |
| 47 |                                                        |                                                             |                                                                                 |     |

1 The PRISMA-P checklist is distributed under the terms of the Creative Commons Attribution License  
2  
3 CC-BY 4.0. This checklist was completed on 06. November 2018 using <http://www.goodreports.org/>,  
4  
5 a tool made by the [EQUATOR Network](#) in collaboration with [Penelope.ai](#)  
6  
7  
8  
9  
10  
11  
12  
13  
14  
15  
16  
17  
18  
19  
20  
21  
22  
23  
24  
25  
26  
27  
28  
29  
30  
31  
32  
33  
34  
35  
36  
37  
38  
39  
40  
41  
42  
43  
44  
45  
46  
47  
48  
49  
50  
51  
52  
53  
54  
55  
56  
57  
58  
59  
60

# BMJ Open

## Cash Transfer Programmes in lower and middle-income countries, understanding pathways to nutritional change – A realist review protocol

|                                 |                                                                                                                                                                                             |
|---------------------------------|---------------------------------------------------------------------------------------------------------------------------------------------------------------------------------------------|
| Journal:                        | <i>BMJ Open</i>                                                                                                                                                                             |
| Manuscript ID                   | bmjopen-2018-028314.R2                                                                                                                                                                      |
| Article Type:                   | Protocol                                                                                                                                                                                    |
| Date Submitted by the Author:   | 05-Apr-2019                                                                                                                                                                                 |
| Complete List of Authors:       | Floate, Hilary; University of Queensland, School of Public Health<br>Marks, Geoffrey; University of Queensland, School of Public Health<br>Durham, Jo; Queensland University of Technology, |
| <b>Primary Subject Heading</b>: | Public health                                                                                                                                                                               |
| Secondary Subject Heading:      | Global health, Nutrition and metabolism, Health economics, Evidence based practice, Health policy                                                                                           |
| Keywords:                       | cash transfer programmes, realist review, nutrition status, nutrition-sensitive, children, food security                                                                                    |
|                                 |                                                                                                                                                                                             |

SCHOLARONE™  
Manuscripts

1  
2  
3  
4 1 Cash Transfer Programmes in lower and middle-income countries, understanding pathways  
5 2 to nutritional change – A realist review protocol  
6 3

8 4 Floate, Hilary<sup>1</sup>; Marks, Geoffrey C.<sup>2</sup>; Durham, Jo<sup>3</sup>

10 5 <sup>1</sup> The University of Queensland, School of Public Health, Herston, Qld 4006 Australia; email:  
11 6 hilary.floate@uqconnect.edu.au

14 7 <sup>2</sup> The University of Queensland, School of Public Health, Herston, Qld 4006 Australia; email:  
15 8 g.marks1@uq.edu.au

18 9 <sup>3</sup> Queensland University of Technology, School of Public Health and Social Work, Kelvin  
19 10 Grove, Qld 4059 Australia; email: joanne.durham@qut.edu.au

22 11 Corresponding author: [hilary.floate@uqconnect.edu.au](mailto:hilary.floate@uqconnect.edu.au)

27 13 Word Count: 6165 (excluding title page, abstract, references and acknowledgements)

31 15 PROSPERO Registration Number: CRD42018110735

## 31 **Abstract**

32 **Introduction:** Child malnutrition continues to be a significant global public health concern.  
33 Nutrition-related interventions have changed and diversified over the last two decades, with  
34 increasing emphasis on nutrition-sensitive programmes which address underlying  
35 determinants of child malnutrition. Cash transfer programmes (CTPs) are used with increasing  
36 popularity in lower and middle-income countries to improve both food/nutrition insecurity and  
37 resilience. Available studies however, provide mixed findings on the outcomes of CTPs for  
38 child nutritional status. This review is the first stage of a research project to develop evidence-  
39 informed theories of how CTPs affect child malnutrition. These will be empirically tested in the  
40 field and contribute to a better understanding of how, why, for whom and in what  
41 circumstances CTPs can be implemented to optimise impacts on child nutritional status.

42 **Methods and analysis:** This realist review is informed by available standards for realist  
43 reviews and follows a five-step process. In step 1 an initial scoping of literature identified  
44 potential contextual factors and underlying mechanisms that influence nutritional outcomes,  
45 and potential theories developed to address our research question. In step 2, a systematic  
46 literature search using multiple databases will be undertaken with papers screened using  
47 defined inclusion/exclusion criteria. In step 3, included studies will be appraised, data  
48 extracted into a bespoke data extraction tool and used to test and further refine our  
49 explanatory framework. The fourth step will synthesise, using a mix of inductive and deductive  
50 analytical processes to identify patterns, link chains of inference and tracking and linking of  
51 articles. The final step involves dissemination of a preliminary theory for feedback prior to  
52 empirically testing it in Kenya and Ethiopia where large-scale CTPs are being implemented.

53 **Ethics and Dissemination:** This review will not involve primary data collection. Findings will  
54 be presented in accordance with RAMESES guidelines and published in a peer-reviewed  
55 journal.

56 **Keywords:** nutrition-sensitive, cash-transfers, unconditional cash transfer, conditional cash  
57 transfer, nutrition insecurity, malnutrition, nutrition status, children, food insecurity,  
58 implementation, realist review

59

60

61

62

1  
2  
3  
4  
5  
6  
7  
8  
9  
10  
11  
12  
13  
14  
15  
16  
17  
18  
19  
20  
21  
22  
23  
24  
25  
26  
27  
28  
29  
30  
31  
32  
33  
34  
35  
36  
37  
38  
39  
40  
41  
42  
43  
44  
45  
46  
47  
48  
49  
50  
51  
52  
53  
54  
55  
56  
57  
58  
59  
60

## 63 Article Summary

### 64 Strengths and Limitations of this study

- 65 ➤ The use of realist review methods enables explicit examination of contextual factors  
66 and underpinning mechanisms to explain how various cash transfer programme  
67 (CTP) implementation structures, services and practices influence child nutrition  
68 outcomes.
- 69 ➤ The review will develop a programme theory and a set of specific hypotheses relating  
70 context-mechanism-outcome as a summary of current understandings that can be  
71 empirically tested through the collection and analysis of primary data.
- 72 ➤ The method includes a broad range of evidence from various data sources, including  
73 grey literature, while strengthening understandings of context it may also affect data  
74 quality.
- 75 ➤ Realist reviews can be difficult to reproduce, we have sought to mitigate this risk  
76 through specification of criteria and approaches that support structured and  
77 reproducible decision-making.
- 78 ➤ The findings will not produce generalisable effect sizes, but may be used to inform  
79 future empirical studies.  
80

81

82

83

84

85

86

87

88

89

90

91

92

93

94

95

## 96 Background

97 Poor nutrition in low-resource countries continues to be an underlying cause of at least one  
98 third of all child deaths and approximately twenty percent of maternal mortality annually<sup>1</sup>.  
99 Nutrition-related interventions have changed and diversified over the last two decades, with  
100 increasing emphasis on nutrition-sensitive programmes which address the underlying  
101 determinants of child malnutrition. Cash transfer programmes (CTPs) are used with increasing  
102 popularity in lower and middle-income countries to improve both food/nutrition insecurity and  
103 resilience<sup>2</sup>. Available studies however, have provided mixed findings on the outcomes of CTPs  
104 on child nutritional status<sup>3-7</sup>. This review is the first stage of a research project that will consider  
105 current evidence and understanding of CTPs to develop programme theories to summarise the  
106 ways in which large-scale CTPs affect child malnutrition. The pathways considered to be most  
107 influential and/or important will form the basis of specific hypotheses to be empirically tested  
108 in the field in subsequent work.

109 The numerous factors that contribute to poor child nutrition in lower and middle-income  
110 countries are summarised in a conceptual framework developed by UNICEF and categorised  
111 as basic determinants (e.g. political and economic structures), underlying (e.g. direct  
112 influences on household food security/health environment/care for mothers and children), and  
113 immediate determinants (e.g. child's dietary intake and child's health status)<sup>8</sup>. As with other  
114 social determinants of health, addressing child nutritional status requires interventions  
115 targeting not only child health, but the structural, environmental and resource related causes  
116 (i.e. underlying and basic determinants), affecting child nutritional status<sup>9</sup>. Based on this  
117 framework, interventions to improve maternal and child nutrition are typically categorised as  
118 nutrition-sensitive or nutrition-specific<sup>10</sup>. Nutrition-sensitive strategies aim to address the  
119 underlying and basic determinants of child nutritional status and include asset support and  
120 social protection initiatives as well as agricultural, infrastructure development, education  
121 programmes<sup>10</sup>. These can support nutrition-specific interventions, such as feeding  
122 programmes and typically target women of reproductive age, pregnant and lactating women  
123 and children under the age of five<sup>11</sup>. Children under the age of five years are the most  
124 vulnerable to malnutrition and associated morbidities, and the prevention of largely irreversible  
125 outcomes (i.e. failure to thrive/stunting) must be addressed in the first 1000 days of life, from  
126 conception until two years of age<sup>10</sup>.

127 Over the last two decades, external donors, policy makers and national governments of  
128 lower and middle-income countries have increasingly used social protection programmes,  
129 including cash transfers, in combination with other targeted programmes to alleviate chronic  
130 and acute food and nutrition insecurity and the underlying social determinants of health in  
131 vulnerable populations<sup>12 13</sup>. CTPs are non-contributory social protection programmes that  
132 provide monetary transfers to low-income households seeking to health and welfare  
133 decisions and outcomes through an 'income effect', and through this to break the  
134 'intergenerational cycle of poverty'<sup>13-15</sup>. They can be categorised into two groups, conditional  
135 cash transfers (CCTs) or unconditional cash transfers (UCTs)<sup>14</sup>. The monetary transfers for  
136 CCTs are conditioned on recipients complying with a set of behavioural requirements,  
137 generally addressing financial barriers associated with accessing social services, such as  
138 school enrolment/attendance or health services<sup>13 14</sup>. UCTs also target low-income individuals  
139 or households with monetary transfers but do not require recipients to meet a set of  
140 conditions<sup>14</sup>. CTPs can also include a combination of monetary transfers and in-kind  
141 assistance (e.g. food rations) and vouchers (for food or other commodities<sup>14 16</sup>. The modality  
142 and duration of CTPs differ by context. CTPs for assistance in humanitarian disasters are  
143 often one-time/short duration and focus on short-term objectives (e.g. relief from a disaster).  
144 A second modality of CTPs are regular and ongoing cash transfers in development settings  
145 focused upon poverty reduction and addressing vulnerabilities with a possible graduation



1  
2  
3 146 from the programme<sup>14</sup>. Other contextual factors that influence the CTP include the social  
4 147 policy environment, availability and accessibility of complementary health and welfare  
5 148 services, socio-demographics of the population, existing behaviours of recipients, and  
6 149 organisational capability and capacity<sup>14</sup>. The nutritional objectives also differ by context with  
7 150 short-term programmes in a humanitarian context generally framed as addressing acute  
8 151 nutritional outcomes such as a reduction in child wasting, while the ongoing programs  
9 152 generally identify longer term nutritional outcomes such as ameliorating child stunting.

11  
12 153 Latin American countries, including Mexico and Brazil, were among the first lower and  
13 154 middle-income countries to implement CCTs to reduce financial barriers to accessing  
14 155 services for low-income individual and households<sup>16-18</sup>. Introduced in the late 1990s, impact  
15 156 evaluations and systematic reviews conducted since have demonstrated positive impacts on  
16 157 access to health and nutrition services and poverty reduction, however, there have been  
17 158 mixed results regarding child nutrition outcomes<sup>3 19</sup>. With the increasing uptake of CTPs in  
18 159 lower and middle-income contexts, such as sub-Saharan Africa and Asia, further studies  
19 160 have demonstrated positive outcomes of CTPs on household food security, food  
20 161 consumption, agricultural yields, poverty reduction and asset protection<sup>3 5-7 20-23</sup> yet expected  
21 162 nutrition benefits (e.g. reduction in wasting and stunting rates of children under five) have not  
22 163 been clearly demonstrated.

24  
25 164 Several research teams have considered this issue<sup>1 3 24 25</sup>. Whilst the studies differ in purpose,  
26 165 design and approach, they each propose pathways by which increased income and/ or  
27 166 financial incentives can affect the underlying determinants of child nutrition status and identify  
28 167 various mediating, moderating or modifying variables that may influence the effect of each  
29 168 pathway on the immediate determinants of child nutrition.

31  
32 169 The framework by de Groot et al<sup>25</sup>, for example, suggests ways that the addition of financial  
33 170 resources can influence the underlying determinants of child nutrition through the three  
34 171 pathways of food security, health and care. The model presented by Leroy and colleagues<sup>3</sup>,  
35 172 although focussed on the impact pathways of CCTs, has similarities to the de Groot  
36 173 conceptual framework. Leroy and colleagues outline how the addition of financial resources  
37 174 can make it easier for a household to purchase higher quantities and quality of food (HH food  
38 175 security), increase access to health services (health) and increase women's control over  
39 176 income and empowerment (care). Each framework highlights possible  
40 177 mediating/moderating/modifying variables that could interrupt the underlying pathways  
41 178 influence the immediate determinants of child nutrition -- shocks, feeding practices and feeding  
42 179 styles, women's time (e.g. additional travel required to collect cash and meet conditions of  
43 180 CCTs), availability of food and food prices, and existing resources for health, can have either  
44 181 positive or negative influences on the impact of cash transfers on child nutrition. The REFANI  
45 182 theory-of-change<sup>24</sup> also maps the pathways, but provides a deeper insight into household  
46 183 choices related to income use and how these might activate mechanisms of change to  
47 184 generate nutrition-related outcomes. The researchers<sup>2 3 5 6 24 25</sup> have identified several gaps in  
48 185 knowledge that warrant further research, examples include; caregiver behaviour (including  
49 186 feeding practices), quality of health and nutrition services, child dietary intake and dietary  
50 187 diversity, individual food security, the costing and cost-effectiveness of cash transfers in the  
51 188 reduction of child undernutrition.

54  
55 189 While each of the models incorporate overarching contextual factors, how context affects the  
56 190 pathways to generate outcomes remains underdeveloped. This is an important gap as  
57 191 implementation structures and programme environments for CTPs with nutrition objectives are  
58 192 heterogeneous. The systems for implementation for example, may include multiple  
59 193 government and non-government agencies and be provided to a diverse range of recipients.

1  
2  
3 194 Cash transfers take numerous forms – conditional/ unconditional cash transfers/ in-kind  
4 195 assistance/vouchers. Further, access to complementary health and welfare services varies.

6 196 Using a realist approach to develop an initial programme theory, the evaluation conducted by  
7 197 Owusu-Addo et al<sup>14</sup> of cash transfers and the social determinants of health in Ghana expands  
8 198 the knowledge of the interplay between context, potential mechanisms, and health outcomes.  
9 199 The authors hypothesise that CTPs have a strong impact on poverty reduction and improve  
10 200 access to services, however, significant changes are needed to improve programme impacts  
11 201 on the social determinants of health<sup>14</sup>. The recommended changes are similar to the findings  
12 202 from the nutrition research (i.e. addressing household motivation, risk-taking behaviour,  
13 203 intersectoral collaboration, programme awareness). The authors provide a programme theory  
14 204 that can be tested and refined in future studies, such as for the realist review proposed herein.

17 205 As discussed in the paper by Floate et al<sup>26</sup> the use of a realist approach in combination with a  
18 206 theory-of-change (e.g. the REFANI theory-of-change) can assist in identifying underlying  
19 207 mechanisms and explore the interplay with contextual factors that result in both planned and  
20 208 unplanned outcomes. While re-examining the frameworks from earlier research using a realist  
21 209 enquiry, we will extend them by explicitly considering how the various CTP programme  
22 210 elements and implementation structures influence the pathways that affect the determinants  
23 211 of child nutrition.

25 212 The review and evidence synthesis outlined in this protocol is the first stage of a research  
26 213 project that employs a theory-driven realist approach<sup>27</sup>. The programme theories developed  
27 214 in this review will be empirically tested in Kenya and Ethiopia (currently implementing large-  
28 215 scale CTPs). To our knowledge this is the first realist review of the impact of CTPs on child  
29 216 nutrition status.

## 31 217 **Methods**

### 32 218 **Realist Review Methodology**

33 219 The realist approach to synthesising evidence has become accepted as a rigorous alternative  
34 220 method to systematic reviews, where the intent is to understand causation. Other forms of  
35 221 systematic reviews were investigated (e.g. meta-analysis), however, while providing  
36 222 information on outcomes, other methods often fail to explain how or why programmes worked  
37 223 and do not easily account for the complexity found in real-world nutrition related CTPs<sup>28</sup>.

39 224 Publication standards have been issued by the RAMESES (Realist and Meta-Narrative  
40 225 Evidence Synthesis: Evolving Standards) project, and realist reviews are utilised with greater  
41 226 frequency in complex intervention evaluations, such as CTPs<sup>14 29-31</sup>. The approach is a theory-  
42 227 based approach to understanding ‘what works for whom in what circumstances’ and  
43 228 importantly, *why and in what context?*<sup>27</sup>.

44 229 The realist approach as proposed by Pawson and Tilley<sup>27</sup>, is based on a specific philosophical  
45 230 approach, that is, realism and more specifically, scientific realism, sitting somewhere between  
46 231 positivism (the belief that knowledge must be scientifically tested with systematic  
47 232 mathematical or logical proof) and constructivism (the theory that knowledge is constructed  
48 233 by humans through their own experiences)<sup>32 33</sup>. The approach is based on the understanding  
49 234 that there is a social reality, but this is socially constructed. Outcomes (O) are generated by  
50 235 mechanism(s) (M) that are triggered within certain contexts (C). The mechanism(s) from a  
51 236 realist perspective (in socially contingent interventions) is usually hidden and is the reaction  
52 237 or response of people to resources introduced by the intervention within a certain context and  
53 238 can be enabling or disabling. Context relates to the setting in which the programme operates,  
54 239 including systems such as health, political, environmental, and social systems. The context

240 can have several layers and can be separated into the outer and inner contexts of an  
241 intervention.

242 In a realist approach, the researcher seeks to understand interventions through the concept  
243 of generative causation that is hypothesised and tested through context-mechanism-  
244 configurations (CMOs)<sup>34</sup>. A key task for the researcher is to identify situations where  
245 interventions have had effective and/or ineffective implementation, achieving either planned  
246 or unplanned outcomes, and to examine the causes of these<sup>35</sup>. Typically, to achieve this  
247 differentiation, potential theories (or candidate theories) of the context, mechanisms and  
248 outcomes in which a programme is or will be implemented are generated throughout the  
249 review, to account for the processes of an intervention that lead to an outcome<sup>36</sup>. CMO  
250 configurations and potential theories are then analysed to inform the creation of protocols for  
251 data collection for the review and analysis. Realist evaluations typically use data from various  
252 sources, including qualitative, quantitative or mixed methods studies. An evidence-informed  
253 programme theory answering the realist question of what works, for whom, under what  
254 circumstances, is the result of the inquiry<sup>27</sup>. All phases of a realist inquiry are iterative, to allow  
255 for constant refinement of potential theories and CMOs. Developing and testing CMO  
256 configurations can help ensure external validity, by enabling a level of abstraction for the  
257 theory, or theories, that can be useful in other contexts.

258 A realist synthesis, which is synonymous with the realist review, applies a realist philosophy  
259 to collate findings from various studies that are related to either a single research question or  
260 a collection of questions<sup>37 38</sup>. The steps of a realist review, as recommended by Pawson et al  
261<sup>34</sup> are as follows: 1. Clarifying the scope of the review 2. Searching for evidence 3. Appraising  
262 primary studies and extracting data 4. Synthesising evidence and drawing conclusions 5.  
263 Disseminating, implementing and evaluating. All phases of a realist inquiry are iterative, to  
264 allow for constant refinement of potential theories and CMOs. Step 1 of the review has been  
265 completed, step 2 is currently in progress.

### 266 Protocol and Review Methods

267 The approach for this protocol has been informed by peer-reviewed realist review protocols  
268 published in the last ten years, RAMESES guidelines and the work of Ray Pawson<sup>27 34 37 39-49</sup>.  
269 We conducted a search of databases such as Medline, Scopus, and Google Scholar, using  
270 search terms including "realist review" and "protocol". Our search yielded 68 records, of which  
271 8 were found to be pertinent for our review<sup>28 39-42 47 49 50</sup>. Relevant protocols were chosen based  
272 on similarities in programme contextual factors, such as national operating systems, multiple  
273 implementing agencies, multifaceted causal chains, and potential outcomes. These have  
274 informed the protocol below. The review commenced in October 2018, with completion  
275 estimated to be in June 2019.

276 To ensure rigour and relevance, we adopt accepted and validated analytic techniques, for  
277 example the MMAT tool (Mixed Methods Appraisal Tool)<sup>51 52</sup>, which are described in more  
278 detail in Step 3 and 4 of this protocol. The use of these techniques will allow us to compare  
279 and consolidate key multidisciplinary implementation attributes and their relationships<sup>39</sup>. We  
280 used the PRISMA-P checklist when writing our report<sup>53</sup>.

### 281 Review objectives

282 To understand the relationships between large-scale cash transfer programmes and child  
283 nutritional status the objectives of our review are to:

- 284 1) identify the programme theories underpinning the designs of CTPs with nutrition  
285 objectives, targeting children under five and pregnant and lactating women in lower  
286 and middle-income countries;

- 1  
2  
3 287 2) identify the mechanisms that explain how CTPs affect child nutrition in lower and  
4 288 middle-income countries;  
5 289 3) examine how key contextual factors, (including implementation structures, programme  
6 290 components and recipient characteristics) interact with resources (i.e. cash transfer  
7 291 and supporting services) and participant reasoning to generate child nutrition  
8 292 outcomes;  
9 293 4) propose how and why CTPs affect, or do not affect child nutrition in lower and middle-  
10 294 income countries.

### 13 295 Patient and Public Involvement

14 296 The public and/or patients were not involved in this stage of the research project.

#### 16 297 Step 1: Clarifying the scope of the review

17 298 Clarifying the scope of review involves understanding the nature and content of the intervention,  
18 299 including its purpose and expected outcomes or impacts. It is often undertaken using an initial  
19 300 literature review and in discussion with practitioners and experts in the field. The purpose of  
20 301 this stage is to develop a framework for examining and synthesising evidence from diverse  
21 302 sources<sup>34</sup> and begin to identify key words and concepts. In this review, the initial theoretical  
22 303 and conceptual frameworks of how nutrition sensitive programmes are theorised to influence  
23 304 child nutrition status were identified based on an initial review of the literature, discussions  
24 305 with relevant stakeholders (e.g. donors, community members, development practitioners)  
25 306 working in nutrition and food security and the first author's practical experience. The initial  
26 307 literature search revealed four potentially relevant frameworks<sup>1 3 24 25</sup>. Based on these  
27 308 frameworks and the UNICEF conceptual framework<sup>1 3 8 24 25</sup>, and complemented by  
28 309 stakeholder interviews and practical experience, we identified common themes across the  
29 310 frameworks and possible gaps in knowledge. We then mapped the proposed pathways and  
30 311 underlying assumptions of how CTPs influence child nutritional status in a conceptual framing  
31 312 exercise (using the UNICEF and other relevant frameworks as our foundation) and then began  
32 313 the process of identifying potential CMO configurations and potential theories. This provides  
33 314 an initial rough programme theory to inform our search strategy and to find the data needed  
34 315 to test and refine these configurations and theories.

35 316 The results included several possible CMOs, and a series of If/Then statements to facilitate in  
36 317 the creation of theories. The CMOs have been categorised into four main domains, that were  
37 318 chosen through the grouping of common concepts and themes. The four main domains are  
38 319 implementation structures, contextual influences, food systems and community response, as  
39 320 represented in Figure 1. Implementation practices have been identified as a key contributing  
40 321 factor in CTPs achieving nutrition outcomes. Therefore, this review will also draw on the  
41 322 practical concepts of implementation research guidelines<sup>54</sup> to help with our understanding of  
42 323 what elements of CTPs contribute to planned or unplanned outcomes.

43 324 An example of two of our hypothesised CMOs and potential theories categorised under the  
44 325 domain of implementation structures and associated capacity building category are as follows:

- 45 326
- 46 327 • Nutrition education provided by a health professional (C), who is skilled in  
47 328 behaviour change techniques (resource M) and able to create nutrition  
48 329 awareness in recipients (response M) that will ensure CTP recipients provide  
49 330 food to their children in sufficient quantity and diversity and prevent/treat  
50 331 diseases, reducing chronic malnutrition rates in children under five (O)  
51 332 OR
  - 52 333 • Nutrition education provided by CTP employees (e.g. government workers or  
53 334 programme monitors) (C), unskilled in behaviour change techniques but trained

334 in CTP protocols (resource M), deliver appropriate nutrition messages and  
 335 health-seeking advice, guaranteeing CTP recipients diversify their child's daily  
 336 dietary intake and prevent diseases (response M), reducing chronic  
 337 malnutrition rates in children under the age of five (O)

## 338 Step 2: Searching for relevant evidence

339 Following specification of our potential programme theories, the next stage will be to identify  
 340 relevant literature to further develop and test the theories. The aim is to identify a broad range  
 341 of studies (including quantitative, qualitative and mixed methods) relating to CTPs and the  
 342 programme theories<sup>55</sup>. The ways in which we will undertake this step are described below.

### 343 Literature search strategy

344 Following the RAMESES guidelines for a realist review, in this step we will undertake an  
 345 iterative approach to searching for relevant literature, allowing relevant new studies to be  
 346 included continuously into findings and the overall synthesis.

347 We expect databases such as Medline, ProQuest, Cochrane, Scopus, Web of Science,  
 348 Business Source Complete, EconLit and Google Scholar to be most instrumental in our search  
 349 of the extant literature. Reports and unpublished papers from the 'gray' literature will be  
 350 sourced from websites such as the World Bank, UNICEF, WFP, WHO, FAO, 3ie Impact  
 351 Database, Transfer Project DFID and USAID. The search will be conducted in English, the  
 352 potential theories and possible CMOs have informed the selection of search terms, including  
 353 for example: cash transfer, nutrition, children, pregnant and lactating women, women of  
 354 reproductive age, nutrition sensitive, conditional cash transfer, unconditional cash transfer,  
 355 social safety nets, financial incentives, food security, food consumption, dietary diversity,  
 356 acute, chronic malnutrition, low-income, middle-income, social protection, implementation,  
 357 World Bank, WFP, UNICEF, WHO, DFID, USAID. The search strategy will include variations  
 358 of the following examples of term combinations:

- 359 • "cash transfers" AND "nutrition"
- 360 • "cash transfers" AND "nutrition" AND "children"
- 361 • "cash transfers" OR "social safety nets" OR "financial incentives" AND "nutrition" OR  
 362 "nutritional status"
- 363 • "cash transfers" OR "conditional cash transfer" OR "unconditional cash transfer" AND  
 364 "nutrition"
- 365 • "cash transfers" AND "food security"

366 All searches will be limited to those published from 1990 (reflecting the start of Latin American  
 367 CTP programmes, where the first large-scale conditional cash transfers were implemented) to  
 368 present.

### 369 Inclusion and exclusion criteria

370 As per the realist approach, in this study, we are less concerned with whether an evaluation  
 371 meets traditional epidemiological methodological standards, (e.g. must be a randomised  
 372 controlled trial or case-control trial), but rather what type of information may be gathered from  
 373 studies about how, why and for whom CTPs achieve nutritional change, and under what  
 374 circumstances. Our inclusion and exclusion criteria have been designed to reflect this, by  
 375 including a variety of studies regardless of study design. The studies will be included or  
 376 excluded based on the following criteria:

#### 377 Included

- 378 1) programmes targeting children under the age of five, including pregnant and lactating  
 379 women;

- 1  
2  
3 380 2) centrally managed programmes implemented through various systems, including  
4 381 national governments, international agencies and non-government organisations;  
5 382 3) programmes in humanitarian/relief and development settings with multiple sites;  
6 383 4) programmes targeting underlying determinants of malnutrition (aspects of food  
7 384 security, health and care) with reduction of malnutrition as a primary objective  
8 385 5) programmes measuring at least one nutrition outcome or an immediate determinant  
9 386 (such as diet, nutritional supplementation rate or associated morbidities).

11  
12 387 **Excluded**

- 13 388 1) programmes targeting school-aged children, adolescents, and adults (except pregnant  
14 389 and lactating women (PLWs))  
15 390 2) welfare programmes in high income countries

16  
17 391 **Article Screening**

18 392 One reviewer will generate a list of articles and abstracts (if available), based on the search  
19 393 strategy mentioned above. These will be separated among the review team, consisting of two  
20 394 reviewers (HF, GM) and titles and abstracts will be reviewed by individual reviewers to see if  
21 395 they 1) focused on CTPs (regardless of modality) and if 2) they appear to fit with the  
22 396 inclusion/exclusion criteria. Reviewers will list the articles as 'include', 'exclude' and 'maybe'  
23 397 <sup>50</sup>. In the absence of an abstract, titles of articles will be used to determine if they are  
24 398 appropriate for review (e.g. mention of CTPs and nutrition outcomes). If the title is ambiguous,  
25 399 the article will remain in the 'maybe' group for the next stage of the review. As described by  
26 400 Velonis<sup>50</sup>, we will ensure inner-rater reliability, through a randomly selected number of article  
27 401 titles and abstracts, each being reviewed independently to determine if the study should be  
28 402 included. In the case of discrepancies, agreements will be reached collectively.

29  
30  
31 403 Following the initial screening, articles that have been labelled 'included' and 'maybe' will be/  
32 404 reviewed a second time by the reviewers. Once completed, the reviewers will discuss and  
33 405 collate results, in cases where an article has been 'included' by one reviewer and 'excluded'  
34 406 by the second reviewer, reasoning will be discussed, and a consensus reached, where  
35 407 consensus cannot be reached a third reviewer will be brought into the discussion.

36  
37 408 The complete article or paper included at this stage, will then be obtained for the final stage  
38 409 of the screening. Inter-rater reliability will be assessed again by having the reviewers read the  
39 410 same randomly selected five articles, make their own recommendations on inclusion and  
40 411 exclusion, then meet to discuss as a group. Results will be discussed collectively between the  
41 412 reviewers to ascertain any differences between findings, points of difference in categorisation  
42 413 will be discussed and consensus reached mutually. The remaining articles will be distributed  
43 414 amongst the reviewers and skim read to make a final decision as to their inclusion or exclusion,  
44 415 findings will again be shared, and consensus reached. Articles will be used as input for step 3  
45 416 of the review.

46  
47  
48  
49 417 **Step 3: Appraising primary studies and extracting data**

50 418 This step seeks to refine our programme theories and CMOs following the initial screening of  
51 419 the literature as outlined in steps 1 and 2 of the protocol as per RAMESES and Pawson  
52 420 recommendations for realist reviews <sup>34 42</sup>. In this step we will seek to review the articles  
53 421 identified in step 2 and consider them in relation to our programme theories for integrity,  
54 422 adjudicate between rival programme theories and review the same theories in comparative  
55 423 settings <sup>34</sup>. These three strategies will facilitate in the consolidation of our programme theories.  
56 424 A final literature search, quality appraisal and data extraction of included studies is also  
57 425 included in this step of the review. For the quality appraisal, where appropriate, the MMAT  
58 426 (Mixed Methods Appraisal Tool)<sup>51 52</sup> will be used to evaluate rigour and credibility of relevant  
59 427 evidence we extract from each study has been generated.

428

1) Reviewing for programme theory integrity

The purpose of this strategy is to study how programmes have been implemented in what contexts and what results they have generated for whom. According to Pawson et al <sup>34</sup>, in a realist synthesis, this strategy can aid in the discovery of typical weak points in the history of the programme under review. For this review, this will mean for example, examining the history of CTPs to identify if changes and deviations in implementation structures have had an influence on child nutrition outcomes.

For example (hypothesised theory):

- CTPs implemented by national governments without external support (C) using standardised CTP protocols and clear guidelines with nutrition objectives (M resource), ensuring CTP implementers have a clear understanding of programme priorities and how to deliver them (M response), are more successful in changing traditional food beliefs (O).

2) Reviewing to adjudicate between rival programme theories

The purpose of this strategy is to identify which variations of mechanisms are most successful in driving different outcomes, by uncovering evidence from competing programme theories <sup>34</sup>. The conceptual frameworks, potential theories and CMOs identified in Step 1 of the review, highlight the numerous possible pathways a CTP may improve child nutrition status. By adjudicating between rival programme theories, we will elicit key causal factors that may be driving changes in outcomes in large-scale CTPs, through analysis of both relevant literature and consultation with a range of stakeholders, to identify what works for whom in what circumstances.

For example (hypothesised theory):

- CTPs provided with nutrition education training (C) are more successful in improving maternal child care practices (O), when delivered by a local midwife/traditional birth attendant (M resource) as women are more likely to trust messages given by established community members (M response).
- OR
- CTPs delivered through condition of attendance to maternal child health services (C), ensure women will improve child care practices (O) or they will not receive monthly cash payments (M resource) and positive nutrition awareness (M response) will only be achieved through constant monitoring.

3) Reviewing the same theory in comparative settings

This strategy addresses the core of realist evaluation to identify patterns in the context in which interventions interact with participant reasoning to generate outcomes <sup>34</sup>. Our theories will be compared between settings with similar CTP modalities in terms of the four domains highlighted in Figure 1.

For example (hypothesised theory):

- Conditional CTPs implemented by national and local governments (C) ensure attendance at MCH clinics for health and nutrition screening, provided by skilled health professionals (M resource), recipients will attend and receive nutrition education, creating positive behaviour change (M response) that will improve the nutrition status of children in recipient households (O).

OR

- Unconditional CTPs provided by INGOs and NGOs (C), with positive implementation histories, will provide nutrition education programmes in conjunction with cash transfers, through skilled outreach workers (M resource) who are trusted by the community (M response) and diversify diets for children in recipient households (O).

### Revisiting the literature

The purpose of a literature search in this step of the review is to further explore evidence from a wide range of programmes, including empirical studies, policy and protocol documents, evaluations, systematic reviews, gray literature (non-peer reviewed documents) from the field (e.g. programme proposals, monitoring reports and donor updates) that will add to the search from step 2 in the development of our programme theories. The search in this phase will be more purposive in nature than in step 2. Reference and citation searches from articles identified in step 2 will be tracked through 'snowballing' search techniques to identify additional documents<sup>34</sup>. Additional articles will be selected at this stage according to whether they add to our emerging theories or areas of explanatory potential in terms of context, mechanism and outcome patterns<sup>42</sup>. New targeted search terms, not included in the original search will be used in this stage of the literature search, as per realist evidence searching recommendations<sup>42 56</sup>.

Searching for new documents will end at the point of theoretical saturation, that is, when we have established there is sufficient evidence to confirm a preliminary theory for testing in the field<sup>37</sup>.

Agency project proposals, donor progress reports, protocol documents and descriptive evaluations will also be used in the identification of effective or ineffective implementation practices.

### Quality appraisal and Data Extraction

One reviewer (HF) has commenced searching databases as per step 2 of the protocol and article screening has commenced. Articles and documents will be appraised by two reviewers (HF, GM), independently using the inclusion/exclusion criteria described earlier.

Realist reviews require the use of a wide range of documents to contribute to the development of programme theories with quality appraisal conducted throughout the review process. Documents or parts of documents therefore are not excluded based on methodological quality but on relevance and rigour<sup>57</sup>. In realist syntheses, unlike a traditional systematic review, an assessment occurs in conjunction with the assessment of the study's relevance and related 'programme theories' and if the methods utilised to generate the data, or related 'programme theories' were appropriate. In other words, in this study we will seek and use different fragments of evidence within each study that are relevant to our programme theories. Each fragment of evidence will be appraised, as it is extracted, for its relevance to theory building and if the methods used to generate the data are trustworthy and credible.

Where appropriate, the MMAT (Mixed Methods Appraisal Tool)<sup>51 52</sup> will be used in our assessment of rigour and credibility of the way in which the fragments of evidence we extract from each study have been generated. The MMAT tool is recommended by RAMESES to appraise the quality of data extracted from studies as it can be applied to studies that use quantitative, qualitative and mixed methods and has been independently tested for efficiency and reliability<sup>28 51 58</sup>. The principle researcher (HF) will lead the process and will share and discuss the emerging synthesis with the other two researchers (GF, JD). In addition, JD will review approximately 10% of included papers and evaluate the extracted data using the



1  
2  
3 525 MMAT tool. Implementation practices have been identified as one of the key influencing  
4 526 factors for CTPs to achieve nutrition outcomes in our potential programme theories, therefore,  
5 527 we will also use as appropriate, the Egan et al.<sup>59</sup> implementation appraisal checklist to guide  
6 528 our appraisal of the quality of reporting of implementation practices from the articles included  
7 529 in our review. The checklist will require some modification due to differing contexts. However,  
8 530 several themes from the Egan et al. checklist are consistent with the organisational-level  
9 531 workplace interventions of the CTPs we are evaluating (e.g. motivation, theory-of-change,  
10 532 employee support, resources provided, differential effects and population characteristics)<sup>59</sup>.  
11 533 These techniques and tools will only be applied to the relevant aspects of the studies that  
12 534 relate to our programme theories rather than the study as a whole<sup>28</sup>.

15 535 Data extraction will focus on key context, mechanism and outcome findings that will contribute  
16 536 to the further development and refinement of CMO configurations and programme theories.  
17 537 Two reviewers (HF, GM) will independently read each source in full, identifying data that will  
18 538 contribute to theory building A bespoke excel spreadsheet will be developed for extracting  
19 539 data and will be formulated and agreed on between the reviewers. The study reviewers will  
20 540 use the spreadsheet to record data relevant to theory building and may include for example,  
21 541 information such as: 1) document bibliographic information 2) country of study/document, 3)  
22 542 the type of CTP , 4) what nutrition outcomes are measured and how they are measured, 5)  
23 543 what proximal outcomes (e.g. improved maternal child care practices through nutrition  
24 544 education support) are measured and how they are measured, 6) contextual factors that are  
25 545 mentioned in the article, 7) mechanisms that lead to outcomes that are mentioned in the  
26 546 article, 8) the study design, 9) the relevance to theory building and 10) the credibility of the  
27 547 methods used to generate the fragments of evidence extracted from the individual studies.  
28 548 When extracting data, if an article does not include all aspects of the theory or data relevant  
29 549 to a question 'Not reported' will be recorded. Where direct quotations are extracted the page  
30 550 number from which the quote was taken will be noted.

34 551 The reviewers will pilot the data extraction sheet by independently extracting data from  
35 552 approximately ten articles and discuss results, the spreadsheet may need modification  
36 553 following piloting. Data will be managed using Microsoft Excel, an annotated notebook will be  
37 554 kept ensuring an audit trail of decision-making is maintained. The findings of the data  
38 555 extraction will provide an overall impression of the depth of the data available and how much  
39 556 it will contribute to our programme theories<sup>50</sup>.

#### 41 557 **Step 4: Synthesising evidence and drawing conclusions**

43 558 This step will involve the identification of recurrent patterns (or demi-regularities) in outcomes,  
44 559 mechanisms and contexts<sup>37</sup> and will be focussed on addressing our research questions

46 560 A mix of inductive and deductive analytical processes will be used to identify patterns in the  
47 561 extracted data, which will be produced in the form of If/Then statements, with the aim of linking  
48 562 the chains of inference, and tracking and linking of articles. Two reviewers (HF, GM) will  
49 563 examine the If/Then statements to identify recurring themes within mechanisms that will be  
50 564 grouped thematically (as anticipated in Figure1) as well as challenging emerging findings and  
51 565 seeking divergent examples. Though this iterative process we will formulate hypotheses,  
52 566 linking themes to chains of inference, which will subsequently be empirically tested in our field  
53 567 work.

56 568 The broader literature will also be used to inform and refine our emerging theories. For  
57 569 example theories that may be drawn on, as per the Owusu-Addo et al<sup>14</sup> realist evaluation are  
58 570 capability theory (Sen<sup>60</sup>), empowerment theory (Kabeer<sup>61</sup>) and self-determination theory  
59 571 (Ryan and Deci<sup>62</sup>). These theories will be consistent with the behavioural and structural

1  
2  
3 572 mechanisms that have been identified in the causal pathways of the underlying determinants  
4 573 of child nutrition. Literature will be located through searches of social science and health  
5 574 databases, as well reviewing the reference lists of included papers and our own libraries.  
6 575 Searches of the literature will be undertaken purposively and iteratively, with the main criterion  
7 576 the ability to refine our programme theories. Search terms for this stage will be developed with  
8 577 the research team based on the key concepts and processes suggested to have explanatory  
9 578 power within the key programme theories identified.

11  
12 579 Based on the review and analysis, the CMO configurations and aspects of programmes  
13 580 theories considered to be the most influential and/or important for nutrition outcomes will be  
14 581 identified, to be tested in research to be undertaken following this review involving primary  
15 582 data collection and consultation with experts and key programme stakeholders.

### 17 583 **Step 5: Dissemination**

18 584 The findings from the review will be presented in accordance with the RAMESES guidelines  
19 585 as recommended by Wong et al<sup>37</sup>. Findings will be published in a peer-reviewed journal. The  
20 586 results will be disseminated to policymakers, external donors, relevant governments, and  
21 587 research institutes (e.g. IFPRI), through formal or informal presentations, conferences and  
22 588 reports.

### 24 589 **Discussion**

25 590 Cash transfer programmes are inherently complex, involving numerous programme  
26 591 components, systems for implementation, aiming to produce a variety of outcomes. They are  
27 592 heterogeneous interventions, ranging from conditional cash transfers to cash and in-kind  
28 593 assistance (e.g. food aid distribution), provided in a diverse range of settings to a variety of  
29 594 recipients. In theory, CTPs should be able to achieve positive nutrition outcomes through their  
30 595 ability to influence the determinants of nutrition status and CTPs are rapidly replacing  
31 596 traditional food security programmes, as a strategy to alleviate chronic poverty for households  
32 597 vulnerable to economic shocks and to improve both food security and nutrition resilience.  
33 598 Evidence suggests CTPs have a positive impact on household food consumption and asset  
34 599 holdings. However, child nutrition outcomes are not routinely achieved through social  
35 600 protection programmes<sup>4</sup> and there are gaps in knowledge of how they can be optimally  
36 601 implemented to consistently influence child nutrition status.

37  
38  
39  
40 602 One of the key contributions of this review, in relation to other CTP impact evaluations and  
41 603 systematic reviews is our focus on how the various CTP programme elements and  
42 604 implementation structures can be implemented synergistically to improve nutrition status,  
43 605 rather than evaluating the impact effect on nutrition through the cash transfer itself. Our initial  
44 606 review of the literature indicates an existing and current evidence base related to CTP impact  
45 607 on both child nutrition indicators and proximal outcomes, such as household food consumption  
46 608 and maternal childcare practices. However, evaluations that also consider the influence of  
47 609 implementation structures and processes have been limited. To our knowledge this is the first  
48 610 realist review of CTPs impact on child nutrition status. The use of this approach in conjunction  
49 611 with other methods for data analysis and synthesis, will offer a deeper understanding of the  
50 612 mechanisms and contextual factors required to address the various determinants of child  
51 613 nutrition status throughout CTP implementation processes.

52  
53  
54 614 The realist review method has limitations and findings may not be easily reproduced where  
55 615 disciplinary perspectives and judgement differs across research teams in terms of relevance  
56 616 and quality of literature identified. We have sought to address this through clear specification  
57 617 of criteria, use of validated approaches (such as the MMAT tool) and maintaining an audit trail  
58 618 throughout the review process to support structured and reproduceable decision-making. The  
59  
60

1  
2  
3 619 strength of the realist review method is its ability to be flexible and adaptable, which suits the  
4 620 complexity of cash transfer programmes with nutrition objectives.

6 621 The research will inform the development of strategies to be included in CTP project design  
7 622 and implementation guidelines to help optimise nutrition impact in contexts where cash  
8 623 transfer programmes are implemented with short or long term objectives.

10 624 **[Figure 1 near here]**

11 625

#### 12 626 **Ethics and dissemination**

14 627 This stage of the study will not involve primary research; however, ethical clearance has  
15 628 been sought through the University of Queensland for the next steps of the research project.  
16 629 Findings will be presented in accordance with RAMESES guidelines and published in a  
17 630 peer-reviewed journal.

#### 19 631 **Acknowledgements:**

20 632 The authors would like to thank the reviewers for their invaluable comments

#### 22 633 **Author Contributions:**

23 634 All authors have contributed to the conception and design of the study, protocol and  
24 635 manuscript. HF wrote the first draft. JD and GM critically reviewed it and provided comments  
25 636 to improve the manuscript. All authors read and approved the final manuscript.

#### 27 637 **Funding:**

28 638 This research received no specific grant from any funding agency in the public, commercial or  
29 639 non-for-profit sectors

#### 31 640 **Competing Interests:**

32 641 None to declare

#### 34 642 **Data Statement:**

35 643 This paper describes a protocol for undertaking a literature review. As such data are not yet  
36 644 available for lodging with a repository

38 645

40 646

41 647

43 648

45 649

47 650

49 651

51 652

52 653

54 654

56 655

58 656

59 657

658 **References**

- 659 1. Black RE, Alderman H, Bhutta ZA, et al. Maternal and child nutrition: building momentum for  
660 impact. *Lancet* 2013;382(9890):372-75. doi: 10.1016/S0140-6736(13)60988-5
- 661 2. Fenn B, Pietzsch S, Morel J. Research on Food Assistance for Nutritional Impact (REFANI):  
662 literature review. 2015
- 663 3. Leroy J, Ruel M, Verhofstadt E. The impact of conditional cash transfer programmes on child  
664 nutrition: a review of evidence using a programme theory framework. *Journal of*  
665 *Development Effectiveness* 2009;1(2):103-29. doi: 10.1080/19439340902924043
- 666 4. Manley J, Gitter S, Slavchevska V. How effective are cash transfers at improving nutritional status?  
667 *World development* 2013;48:133-55.
- 668 5. Sibson VL, Grijalva-Eternod CS, Noura G, et al. Findings from a cluster randomised trial of  
669 unconditional cash transfers in Niger. *Matern Child Nutr* 2018;14(4):e12615. doi:  
670 10.1111/mcn.12615 [published Online First: 2018/05/10]
- 671 6. Hougbe F, Tonguet-Papucci A, Altare C, et al. Unconditional Cash Transfers Do Not Prevent  
672 Children's Undernutrition in the Moderate Acute Malnutrition Out (MAM'Out) Cluster-  
673 Randomized Controlled Trial in Rural Burkina Faso. *The Journal of Nutrition*  
674 2017;147(7):1410-17. doi: 10.3945/jn.117.247858
- 675 7. Grijalva-Eternod CS, Jelle M, Haghparsad-Bidgoli H, et al. A cash-based intervention and the risk of  
676 acute malnutrition in children aged 6-59 months living in internally displaced persons camps  
677 in Mogadishu, Somalia: A non-randomised cluster trial. *PLoS Med* 2018;15(10):e1002684.  
678 doi: 10.1371/journal.pmed.1002684 [published Online First: 2018/10/30]
- 679 8. UNICEF. Conceptual framework of the causes of malnutrition. *New York: UNICEF* 1991
- 680 9. Ruel M., Alderman H. Nutrition-sensitive interventions and programmes: how can they help to  
681 accelerate progress in improving maternal and child nutrition? *Lancet* 2013;382(9891):536.  
682 doi: 10.1016/S0140-6736(13)60843-0
- 683 10. Ruel MT, Alderman H, Maternal Child Nutr Study G. Nutrition-sensitive interventions and  
684 programmes: how can they help to accelerate progress in improving maternal and child  
685 nutrition? *Lancet* 2013;382(9891):536-51. doi: 10.1016/s0140-6736(13)60843-0
- 686 11. Bhutta Zulfiqar. A, Ahmed T, Black RE, et al. What works? Interventions for maternal and child  
687 undernutrition and survival. *The Lancet* 2008;371(9610):417-40. doi: 10.1016/S0140-  
688 6736(07)61693-6
- 689 12. Bright T, Felix L, Kuper H, et al. A systematic review of strategies to increase access to health  
690 services among children in low and middle income countries. *BMC Health Serv Res*  
691 2017;17(1):252.
- 692 13. Lagarde M, Haines A, Palmer N. Conditional cash transfers for improving uptake of health  
693 interventions in low- and middle-income countries: a systematic review. *JAMA* 2007;298 doi:  
694 10.1001/jama.298.16.1900
- 695 14. Owusu-Addo E, Renzaho AMN, Smith BJ. Cash transfers and the social determinants of health:  
696 Towards an initial realist program theory. *Evaluation* 2018;0(0):1356389018814868. doi:  
697 10.1177/1356389018814868
- 698 15. Baird S, Ferreira FHG, Berk Ö, et al. Relative Effectiveness of Conditional and Unconditional Cash  
699 Transfers for Schooling Outcomes in Developing Countries: A Systematic Review. *Campbell*  
700 *Systematic Reviews* 2013;9(8)
- 701 16. Fiszbein, Schady, Ferreira. Conditional Cash Transfers Reducing Present and Future Poverty.  
702 Washington, DC: World Bank 2009.
- 703 17. Barbosa AL, Neves, De H, et al. Conditional cash transfer and informality in Brazil. *IZA Journal of*  
704 *Labor & Development* 2014;3(1):1-18. doi: <http://dx.doi.org/10.1186/s40175-014-0024-0>
- 705 18. Baird S, Ferreira FHG, Özler B, et al. Conditional, unconditional and everything in between: a  
706 systematic review of the effects of cash transfer programmes on schooling outcomes.  
707 *Journal of Development Effectiveness* 2014;6(1):1-43. doi: 10.1080/19439342.2014.890362

1  
2  
3  
4  
5  
6  
7  
8  
9  
10  
11  
12  
13  
14  
15  
16  
17  
18  
19  
20  
21  
22  
23  
24  
25  
26  
27  
28  
29  
30  
31  
32  
33  
34  
35  
36  
37  
38  
39  
40  
41  
42  
43  
44  
45  
46  
47  
48  
49  
50  
51  
52  
53  
54  
55  
56  
57  
58  
59  
60

19. Paes-Sousa R, Santos LMP, Miazaki ÉS. Effects of a conditional cash transfer programme on child nutrition in Brazil. *World Health Organization Bulletin of the World Health Organization* 2011;89(7):496-503.
20. Debela BL, Shively G, Holden ST. Does Ethiopia's Productive Safety Net Program improve child nutrition? *Food Security* 2015;7(6):1273-89. doi: 10.1007/s12571-015-0499-9
21. Berhane G, Gilligan DO, Hoddinott J, et al. Can Social Protection Work in Africa? The Impact of Ethiopia's Productive Safety Net Programme. *Economic Development and Cultural Change* 2014;63(1):1-26.
22. Gilligan DO, Hoddinott J, Taffesse AS. The Impact of Ethiopia's Productive Safety Net Programme and its Linkages. *The Journal of Development Studies* 2009;45(10):1684-706. doi: 10.1080/00220380902935907
23. Kumar N. The impact of Ethiopia's Productive Safety Net Programme on the nutritional status of children: 2008–2012: International Food Policy Research Institute (IFPRI), 2017.
24. Fenn B, Sangrasi GM, Puett C, et al. The REFANI Pakistan study--a cluster randomised controlled trial of the effectiveness and cost-effectiveness of cash-based transfer programmes on child nutrition status: study protocol. *BMC Public Health* 2015;15:1044. doi: 10.1186/s12889-015-2380-3 [published Online First: 2015/10/16]
25. de Groot R, Palermo T, Handa S, et al. Cash Transfers and Child Nutrition: Pathways and Impacts. *Development Policy Review* 2017;35(5):621-43. doi: 10.1111/dpr.12255
26. Floate H, Durham J, Marks GC. Moving on from logical frameworks to find the 'missing middle' in international development programmes. *Journal of Development Effectiveness* 2018:1-15.
27. Pawson R, Tilley N. Realistic evaluation. Thousand Oaks, Calif;London;: Sage 1997.
28. Iyengar S, Katz A, Durham J. Role of institutional entrepreneurship in building adaptive capacity in community-based healthcare organisations: realist review protocol. *BMJ Open* 2016;6(3) doi: 10.1136/bmjopen-2015-010915
29. Greenhalgh T, Humphrey C, Hughes J, et al. How Do You Modernize a Health Service? A Realist Evaluation of Whole-Scale Transformation in London. *Milbank Q* 2009;87(2):391-416. doi: 10.1111/j.1468-0009.2009.00562.x
30. Schierhout G, Hains J, Si D, et al. Evaluating the effectiveness of a multifaceted, multilevel continuous quality improvement program in primary health care: Developing a realist theory of change. *Implementation Science* 2013;8(1)
31. Nilsson D, Baxter G, Butler JRA, et al. How do community-based conservation programs in developing countries change human behaviour? A realist synthesis. *Biol Conserv* 2016;200:93-103. doi: 10.1016/j.biocon.2016.05.020
32. Westhorp G. Realist impact evaluation: An introduction (Methods Lab). London: Overseas Development Institute, 2014.
33. Westhorp G. Using complexity-consistent theory for evaluating complex systems. *Evaluation* 2012;18(4):405-20. doi: 10.1177/1356389012460963
34. Pawson R, Greenhalgh T, Harvey G, et al. Realist review-a new method of systematic review designed for complex policy interventions. *J Health Serv Res Policy* 2005;10(1\_suppl):21-34.
35. Pawson R. Protocols, policy making and scientific progress. *Journal of Epidemiology and Community Health (1979-)* 2012;66(5):386-87. doi: 10.1136/jech-2012-201061
36. Marchal B, van Belle S, van Olmen J, et al. Is realist evaluation keeping its promise? A review of published empirical studies in the field of health systems research. *Evaluation* 2012;18(2):192-212. doi: 10.1177/1356389012442444
37. Wong G, Greenhalgh T, Westhorp G, et al. RAMESES publication standards: realist syntheses. *BMC Med* 2013;11(1):1-14. doi: 10.1186/1741-7015-11-21
38. Pawson R. Evidence-based policy: a realist perspective. London: SAGE 2006.
39. Kastner M, Estey E, Perrier L, et al. Understanding the relationship between the perceived characteristics of clinical practice guidelines and their uptake: protocol for a realist review.

- 1  
2  
3 758 *Implementation Science* 2011;6:69. doi: 10.1186/1748-5908-6-69 [published Online First:  
4 759 2011/07/08]
- 5 760 40. Hudon C, Chouinard MC, Aubrey-Bassler K, et al. Case management in primary care among  
6 761 frequent users of healthcare services with chronic conditions: protocol of a realist synthesis.  
7 762 *BMJ Open* 2017;7(9):e017701. doi: 10.1136/bmjopen-2017-017701 [published Online First:  
8 763 2017/09/06]
- 9 764 41. Papoutsi C, Hargreaves D, Colligan G, et al. Group clinics for young adults with diabetes in an  
10 765 ethnically diverse, socioeconomically deprived setting (TOGETHER study): protocol for a  
11 766 realist review, co-design and mixed methods, participatory evaluation of a new care model.  
12 767 *BMJ Open* 2017;7(6):e017363. doi: 10.1136/bmjopen-2017-017363 [published Online First:  
13 768 2017/06/24]
- 14 769 42. Cooper C, Lhussier M, Shucksmith J, et al. Protocol for a realist review of complex interventions  
15 770 to prevent adolescents from engaging in multiple risk behaviours. *BMJ Open* 2017;7(9) doi:  
16 771 10.1136/bmjopen-2016-015477
- 17 772 43. Wiese A, Kilty C, Bergin C, et al. Protocol for a realist review of workplace learning in  
18 773 postgraduate medical education and training. *Systematic Reviews* 2017;6(1) doi:  
19 774 10.1186/s13643-017-0415-9
- 20 775 44. Menear M, Gervais M, Careau E, et al. Strategies and impacts of patient and family engagement  
21 776 in collaborative mental healthcare: Protocol for a systematic and realist review. *BMJ Open*  
22 777 2016;6(9) doi: 10.1136/bmjopen-2016-012949
- 23 778 45. Booth V, Harwood R, Hood V, et al. Understanding the theoretical underpinning of the exercise  
24 779 component in a fall prevention programme for older adults with mild dementia: A realist  
25 780 review protocol. *Systematic Reviews* 2016;5(1) doi: 10.1186/s13643-016-0212-x
- 26 781 46. Coles E, Wells M, Maxwell M, et al. The influence of contextual factors on healthcare quality  
27 782 improvement initiatives: What works, for whom and in what setting? Protocol for a realist  
28 783 review. *Systematic Reviews* 2017;6(1) doi: 10.1186/s13643-017-0566-8
- 29 784 47. Groot G, Waldron T, Carr T, et al. Development of a program theory for shared decision-making:  
30 785 A realist review protocol. *Systematic Reviews* 2017;6(1) doi: 10.1186/s13643-017-0508-5
- 31 786 48. McGaughey J, O'Halloran P, Porter S, et al. Early warning systems and rapid response to the  
32 787 deteriorating patient in hospital: A systematic realist review. *J Adv Nurs* 2017;73(12):2877-  
33 788 91. doi: 10.1111/jan.13398
- 34 789 49. Zubair M, Chadborn NH, Gladman JRF, et al. Using comprehensive geriatric assessment for  
35 790 quality improvements in healthcare of older people in UK care homes: Protocol for realist  
36 791 review within Proactive Healthcare of Older People in Care Homes (PEACH) study. *BMJ Open*  
37 792 2017;7(10) doi: 10.1136/bmjopen-2017-017270
- 38 793 50. Velonis AJ, Cheff R, Finn D, et al. Searching for the mechanisms of change: a protocol for a realist  
39 794 review of batterer treatment programmes. *BMJ Open* 2016;6(4) doi: 10.1136/bmjopen-  
40 795 2015-010173
- 41 796 51. Pace R, Pluye P, Bartlett G, et al. Testing the reliability and efficiency of the pilot Mixed Methods  
42 797 Appraisal Tool (MMAT) for systematic mixed studies review. *Int J Nurs Stud* 2011;49(1) doi:  
43 798 10.1016/j.ijnurstu.2011.07.002
- 44 799 52. Pluye P, Gagnon M-P, Griffiths F, et al. A scoring system for appraising mixed methods research,  
45 800 and concomitantly appraising qualitative, quantitative and mixed methods primary studies  
46 801 in Mixed Studies Reviews. *Int J Nurs Stud* 2009;46(4):529-46. doi:  
47 802 <https://doi.org/10.1016/j.ijnurstu.2009.01.009>
- 48 803 53. Moher D, Shamseer L, Clarke M, et al. Preferred reporting items for systematic review and meta-  
49 804 analysis protocols (PRISMA-P) 2015 statement.(Research)(Report). *Systematic Reviews*  
50 805 2015;4(1):1. doi: 10.1186/2046-4053-4-1
- 51 806 54. Werner A. A guide to implementation research: Washington, D.C. : Urban Institute Press 2004.
- 52 807 55. Pawson R, Greenhalgh T, Harvey G, et al. Realist synthesis: an introduction. *Manchester: ESRC*  
53 808 *Research Methods Programme, University of Manchester* 2004

- 1  
2  
3 809 56. Pawson R. Digging for Nuggets: How 'Bad' Research Can Yield 'Good' Evidence. *International*  
4 810 *Journal of Social Research Methodology* 2006;9(2):127-42. doi:  
5 811 10.1080/13645570600595314  
6 812 57. Wong G, Westhorp G, Pawson R, et al. Realist synthesis. *RAMESES training materials London: The*  
7 813 *RAMESES Project* 2013  
8 814 58. Mertens DM. Transformative research and evaluation. New York: Guilford Press 2009.  
9 815 59. Egan M, Bambra C, Petticrew M, et al. Reviewing evidence on complex social interventions:  
10 816 appraising implementation in systematic reviews of the health effects of organisational-level  
11 817 workplace interventions. 2008;63(1) doi: 10.1136/jech.2007.071233  
12 818 60. Sen A. Development as freedom: Oxford : Oxford University Press 1999.  
13 819 61. Kabeer N. Resources, Agency, Achievements: Reflections on the Measurement of Women's  
14 820 Empowerment. *Development and Change* 1999;30(3):435-64. doi: 10.1111/1467-  
15 821 7660.00125  
16 822 62. Ryan RM, Deci EL. Self-Determination Theory and the Facilitation of Intrinsic Motivation, Social  
17 823 Development, and Well-Being. *Am Psychol* 2000;55(1):68-78. doi: 10.1037/0003-  
18 824 066X.55.1.68  
19  
20  
21  
22 825  
23

#### 826 Figure Captions

827 Figure 1: Theoretical framework domains  
828  
829  
830  
831

1  
2  
3  
4  
5  
6  
7  
8  
9  
10  
11  
12  
13  
14  
15  
16  
17  
18  
19  
20  
21  
22  
23  
24  
25  
26  
27  
28  
29  
30  
31  
32  
33  
34  
35  
36  
37  
38  
39  
40  
41  
42  
43  
44  
45  
46  
47  
48  
49  
50  
51  
52  
53  
54  
55  
56  
57  
58  
59  
60



Created by Universal Document Converter

Figure 1: Theoretical Framework Domains

209x297mm (300 x 300 DPI)



# Reporting checklist for protocol of a systematic review.

Based on the PRISMA-P guidelines.

## Instructions to authors

Complete this checklist by entering the page numbers from your manuscript where readers will find each of the items listed below.

Your article may not currently address all the items on the checklist. Please modify your text to include the missing information. If you are certain that an item does not apply, please write "n/a" and provide a short explanation.

Upload your completed checklist as an extra file when you submit to a journal.

In your methods section, say that you used the PRISMA-P reporting guidelines, and cite them as:

Moher D, Shamseer L, Clarke M, Ghersi D, Liberati A, Petticrew M, Shekelle P, Stewart LA. Preferred Reporting Items for Systematic Review and Meta-Analysis Protocols (PRISMA-P) 2015 statement. Syst Rev. 2015;4(1):1.

|                |     |                                                                                    | Page   |
|----------------|-----|------------------------------------------------------------------------------------|--------|
|                |     | Reporting Item                                                                     | Number |
| Identification | #1a | Identify the report as a protocol of a systematic review                           | 1      |
| Update         | #1b | If the protocol is for an update of a previous systematic review, identify as such | N/A    |

|    |                      |     |                                                                 |     |
|----|----------------------|-----|-----------------------------------------------------------------|-----|
| 1  |                      | #2  | If registered, provide the name of the registry (such as        | 1   |
| 2  |                      |     | PROSPERO) and registration number                               |     |
| 3  |                      |     |                                                                 |     |
| 4  |                      |     |                                                                 |     |
| 5  |                      |     |                                                                 |     |
| 6  | Contact              | #3a | Provide name, institutional affiliation, e-mail address of all  | 1   |
| 7  |                      |     | protocol authors; provide physical mailing address of           |     |
| 8  |                      |     | corresponding author                                            |     |
| 9  |                      |     |                                                                 |     |
| 10 |                      |     |                                                                 |     |
| 11 |                      |     |                                                                 |     |
| 12 |                      |     |                                                                 |     |
| 13 |                      |     |                                                                 |     |
| 14 | Contribution         | #3b | Describe contributions of protocol authors and identify the     | 13  |
| 15 |                      |     | guarantor of the review                                         |     |
| 16 |                      |     |                                                                 |     |
| 17 |                      |     |                                                                 |     |
| 18 |                      |     |                                                                 |     |
| 19 |                      |     |                                                                 |     |
| 20 |                      | #4  | If the protocol represents an amendment of a previously         | N/A |
| 21 |                      |     | completed or published protocol, identify as such and list      |     |
| 22 |                      |     | changes; otherwise, state plan for documenting important        |     |
| 23 |                      |     | protocol amendments                                             |     |
| 24 |                      |     |                                                                 |     |
| 25 |                      |     |                                                                 |     |
| 26 |                      |     |                                                                 |     |
| 27 |                      |     |                                                                 |     |
| 28 |                      |     |                                                                 |     |
| 29 | Sources              | #5a | Indicate sources of financial or other support for the review   | 13  |
| 30 |                      |     |                                                                 |     |
| 31 |                      |     |                                                                 |     |
| 32 | Sponsor              | #5b | Provide name for the review funder and / or sponsor             | N/A |
| 33 |                      |     |                                                                 |     |
| 34 |                      |     |                                                                 |     |
| 35 |                      |     |                                                                 |     |
| 36 | Role of sponsor or   | #5c | Describe roles of funder(s), sponsor(s), and / or               | N/A |
| 37 | funder               |     | institution(s), if any, in developing the protocol              |     |
| 38 |                      |     |                                                                 |     |
| 39 |                      |     |                                                                 |     |
| 40 |                      |     |                                                                 |     |
| 41 | Rationale            | #6  | Describe the rationale for the review in the context of what is | 5   |
| 42 |                      |     | already known                                                   |     |
| 43 |                      |     |                                                                 |     |
| 44 |                      |     |                                                                 |     |
| 45 |                      |     |                                                                 |     |
| 46 | Objectives           | #7  | Provide an explicit statement of the question(s) the review     | 7   |
| 47 |                      |     | will address with reference to participants, interventions,     |     |
| 48 |                      |     | comparators, and outcomes (PICO)                                |     |
| 49 |                      |     |                                                                 |     |
| 50 |                      |     |                                                                 |     |
| 51 |                      |     |                                                                 |     |
| 52 |                      |     |                                                                 |     |
| 53 |                      |     |                                                                 |     |
| 54 | Eligibility criteria | #8  | Specify the study characteristics (such as PICO, study          | 8   |
| 55 |                      |     | design, setting, time frame) and report characteristics (such   |     |
| 56 |                      |     |                                                                 |     |
| 57 |                      |     |                                                                 |     |
| 58 |                      |     |                                                                 |     |
| 59 |                      |     |                                                                 |     |
| 60 |                      |     |                                                                 |     |

|    |                   |      |                                                                |    |
|----|-------------------|------|----------------------------------------------------------------|----|
| 1  |                   |      | as years considered, language, publication status) to be       |    |
| 2  |                   |      |                                                                |    |
| 3  |                   |      | used as criteria for eligibility for the review                |    |
| 4  |                   |      |                                                                |    |
| 5  |                   |      |                                                                |    |
| 6  | Information       | #9   | Describe all intended information sources (such as             | 8  |
| 7  |                   |      |                                                                |    |
| 8  | sources           |      | electronic databases, contact with study authors, trial        |    |
| 9  |                   |      |                                                                |    |
| 10 |                   |      | registers or other grey literature sources) with planned dates |    |
| 11 |                   |      |                                                                |    |
| 12 |                   |      | of coverage                                                    |    |
| 13 |                   |      |                                                                |    |
| 14 |                   |      |                                                                |    |
| 15 |                   |      |                                                                |    |
| 16 | Search strategy   | #10  | Present draft of search strategy to be used for at least one   | 8  |
| 17 |                   |      |                                                                |    |
| 18 |                   |      | electronic database, including planned limits, such that it    |    |
| 19 |                   |      |                                                                |    |
| 20 |                   |      | could be repeated                                              |    |
| 21 |                   |      |                                                                |    |
| 22 |                   |      |                                                                |    |
| 23 | Study records -   | #11a | Describe the mechanism(s) that will be used to manage          | 11 |
| 24 |                   |      |                                                                |    |
| 25 | data management   |      | records and data throughout the review                         |    |
| 26 |                   |      |                                                                |    |
| 27 |                   |      |                                                                |    |
| 28 |                   |      |                                                                |    |
| 29 | Study records -   | #11b | State the process that will be used for selecting studies      | 9  |
| 30 |                   |      |                                                                |    |
| 31 | selection process |      | (such as two independent reviewers) through each phase of      |    |
| 32 |                   |      |                                                                |    |
| 33 |                   |      | the review (that is, screening, eligibility and inclusion in   |    |
| 34 |                   |      |                                                                |    |
| 35 |                   |      | meta-analysis)                                                 |    |
| 36 |                   |      |                                                                |    |
| 37 |                   |      |                                                                |    |
| 38 |                   |      |                                                                |    |
| 39 | Study records -   | #11c | Describe planned method of extracting data from reports        | 11 |
| 40 |                   |      |                                                                |    |
| 41 | data collection   |      | (such as piloting forms, done independently, in duplicate),    |    |
| 42 |                   |      |                                                                |    |
| 43 | process           |      | any processes for obtaining and confirming data from           |    |
| 44 |                   |      |                                                                |    |
| 45 |                   |      | investigators                                                  |    |
| 46 |                   |      |                                                                |    |
| 47 |                   |      |                                                                |    |
| 48 | Data items        | #12  | List and define all variables for which data will be sought    | 10 |
| 49 |                   |      |                                                                |    |
| 50 |                   |      | (such as PICO items, funding sources), any pre-planned         |    |
| 51 |                   |      |                                                                |    |
| 52 |                   |      | data assumptions and simplifications                           |    |
| 53 |                   |      |                                                                |    |
| 54 |                   |      |                                                                |    |
| 55 |                   |      |                                                                |    |
| 56 |                   |      |                                                                |    |
| 57 |                   |      |                                                                |    |
| 58 |                   |      |                                                                |    |
| 59 |                   |      |                                                                |    |
| 60 |                   |      |                                                                |    |

|    |                                         |                                       |                                                                                                                                            |                                                                                                                                                                                                                               |                                                                                                                                                                                                                                                                    |     |
|----|-----------------------------------------|---------------------------------------|--------------------------------------------------------------------------------------------------------------------------------------------|-------------------------------------------------------------------------------------------------------------------------------------------------------------------------------------------------------------------------------|--------------------------------------------------------------------------------------------------------------------------------------------------------------------------------------------------------------------------------------------------------------------|-----|
| 1  | Outcomes and<br>prioritization          | #13                                   | List and define all outcomes for which data will be sought,<br>including prioritization of main and additional outcomes, with<br>rationale | 12                                                                                                                                                                                                                            |                                                                                                                                                                                                                                                                    |     |
| 2  |                                         | Risk of bias in<br>individual studies | #14                                                                                                                                        | Describe anticipated methods for assessing risk of bias of<br>individual studies, including whether this will be done at the<br>outcome or study level, or both; state how this information<br>will be used in data synthesis | 11                                                                                                                                                                                                                                                                 |     |
| 3  |                                         |                                       | Data synthesis                                                                                                                             | #15a                                                                                                                                                                                                                          | Describe criteria under which study data will be<br>quantitatively synthesised                                                                                                                                                                                     | N/A |
| 4  |                                         |                                       |                                                                                                                                            | #15b                                                                                                                                                                                                                          | If data are appropriate for quantitative synthesis, describe<br>planned summary measures, methods of handling data and<br>methods of combining data from studies, including any<br>planned exploration of consistency (such as I <sup>2</sup> , Kendall's $\tau$ ) | N/A |
| 5  |                                         |                                       |                                                                                                                                            | #15c                                                                                                                                                                                                                          | Describe any proposed additional analyses (such as<br>sensitivity or subgroup analyses, meta-regression)                                                                                                                                                           | N/A |
| 6  |                                         |                                       |                                                                                                                                            | #15d                                                                                                                                                                                                                          | If quantitative synthesis is not appropriate, describe the type<br>of summary planned                                                                                                                                                                              | 12  |
| 7  |                                         |                                       | Meta-bias(es)                                                                                                                              | #16                                                                                                                                                                                                                           | Specify any planned assessment of meta-bias(es) (such as<br>publication bias across studies, selective reporting within<br>studies)                                                                                                                                | 11  |
| 8  | Confidence in<br>cumulative<br>evidence |                                       |                                                                                                                                            | #17                                                                                                                                                                                                                           | Describe how the strength of the body of evidence will be<br>assessed (such as GRADE)                                                                                                                                                                              | 6   |
| 9  |                                         |                                       |                                                                                                                                            |                                                                                                                                                                                                                               |                                                                                                                                                                                                                                                                    |     |
| 10 |                                         |                                       |                                                                                                                                            |                                                                                                                                                                                                                               |                                                                                                                                                                                                                                                                    |     |

1 The PRISMA-P checklist is distributed under the terms of the Creative Commons Attribution License  
2  
3 CC-BY 4.0. This checklist was completed on 06. November 2018 using <http://www.goodreports.org/>,  
4  
5 a tool made by the [EQUATOR Network](#) in collaboration with [Penelope.ai](#)  
6  
7  
8  
9  
10  
11  
12  
13  
14  
15  
16  
17  
18  
19  
20  
21  
22  
23  
24  
25  
26  
27  
28  
29  
30  
31  
32  
33  
34  
35  
36  
37  
38  
39  
40  
41  
42  
43  
44  
45  
46  
47  
48  
49  
50  
51  
52  
53  
54  
55  
56  
57  
58  
59  
60

For peer review only
